# Supplementary material for: Universal or targeted approach to prevent the transmission of extended-spectrum beta-lactamase-producing Enterobacteriaceae in intensive care units: a cost-effectiveness analysis
Source: PubMed Central journal article supplement — BMJ Open. 2017 Nov 3;7(11):e017402. doi: 10.1136/bmjopen-2017-017402 (PMC5722099; doi:10.1136/bmjopen-2017-017402), 2017-11-03

# BMJ Open

BMJ Open is committed to open peer review. As part of this commitment we make the peer review history of every article we publish publicly available.

When an article is published we post the peer reviewers' comments and the authors' responses online. We also post the versions of the paper that were used during peer review. These are the versions that the peer review comments apply to.

The versions of the paper that follow are the versions that were submitted during the peer review process. They are not the versions of record or the final published versions. They should not be cited or distributed as the published version of this manuscript.

BMJ Open is an open access journal and the full, final, typeset and author-corrected version of record of the manuscript is available on our site with no access controls, subscription charges or pay-per-view fees (<http://bmjopen.bmj.com>).

If you have any questions on BMJ Open's open peer review process please email [info.bmjopen@bmj.com](mailto:info.bmjopen@bmj.com)

# BMJ Open

## Universal or targeted approach to prevent the transmission of extended-spectrum beta-lactamase-producing Enterobacteriaceae in intensive care units? A cost-effectiveness analysis

|                                 |                                                                                                                                                                                                                                                                                                                                                                                                                                                                                                  |
|---------------------------------|--------------------------------------------------------------------------------------------------------------------------------------------------------------------------------------------------------------------------------------------------------------------------------------------------------------------------------------------------------------------------------------------------------------------------------------------------------------------------------------------------|
| Journal:                        | <i>BMJ Open</i>                                                                                                                                                                                                                                                                                                                                                                                                                                                                                  |
| Manuscript ID                   | bmjopen-2017-017402                                                                                                                                                                                                                                                                                                                                                                                                                                                                              |
| Article Type:                   | Research                                                                                                                                                                                                                                                                                                                                                                                                                                                                                         |
| Date Submitted by the Author:   | 21-Apr-2017                                                                                                                                                                                                                                                                                                                                                                                                                                                                                      |
| Complete List of Authors:       | Sloma, Lidia; Inserm UMR 1137, UMR 1137 – UFR de Médecine Paris 7 Denis Diderot<br>Lucet, Jean-Christophe ; INSERM, UMR 1137<br>perozziello, anne; Inserm, UMR 1137<br>Pelat, Camille; Inserm, UMR 1137<br>Birgand, Gabriel; Assistance Publique - Hopitaux de Paris<br>Ruppé, Etienne; Assistance Publique - Hopitaux de Paris<br>Boelle, Pierre-Yves; INSERM UMR S 707, ; INSERM, U707<br>Andremont, Antoine; Assistance Publique - Hopitaux de Paris<br>yazdanpanah, yazdan; INSERM, UMR 1137 |
| <b>Primary Subject Heading</b>: | Infectious diseases                                                                                                                                                                                                                                                                                                                                                                                                                                                                              |
| Secondary Subject Heading:      | Epidemiology, Health economics, Public health, Intensive care, Health policy                                                                                                                                                                                                                                                                                                                                                                                                                     |
| Keywords:                       | Infection control < INFECTIOUS DISEASES, Adult intensive & critical care < INTENSIVE & CRITICAL CARE, Cost-effectiveness                                                                                                                                                                                                                                                                                                                                                                         |
|                                 |                                                                                                                                                                                                                                                                                                                                                                                                                                                                                                  |

SCHOLARONE™  
Manuscripts

1  
2  
3 1 Intended category: Research  
4

5  
6 2 **Universal or targeted approach to prevent the transmission of**  
7  
8  
9 3 **extended-spectrum beta-lactamase–producing *Enterobacteriaceae* in**  
10  
11  
12 4 **intensive care units? A cost-effectiveness analysis**  
13

14  
15  
16 5 Lidia Kardaś-Słoma, PhD;<sup>1,2</sup>, Jean-Christophe Lucet, Prof; <sup>1,2,3</sup>, Anne Perozziello, MS;<sup>1,2</sup>,  
17  
18 6 Camille Pelat, PhD;<sup>1,2</sup>, Gabriel Birgand, PhD;<sup>1,2,3</sup>, Etienne Ruppé, PhD;<sup>4</sup>, Pierre-Yves  
19  
20 7 Boëlle, Prof;<sup>5</sup>, Antoine Andremont, Prof;<sup>4</sup> and Yazdan Yazdanpanah, Prof<sup>1,2,6</sup>  
21

22  
23 8 <sup>1</sup> INSERM, Infection, Antimicrobials, Modelisation, Evolution (IAME), UMR 1137, F-75018  
24  
25  
26 9 Paris, France  
27

28 10 <sup>2</sup>University of Paris Diderot, IAME, UMR 1137, Sorbonne Paris Cité, F-75018 Paris, France  
29

30 11 <sup>3</sup> AP-HP, Bichat-Claude Bernard Hospital, Infection Control Unit, F-75018 Paris, France  
31

32 12 <sup>4</sup>AP-HP, Bichat-Claude Bernard Hospital, Bacteriology Laboratory, F-75018 Paris, France  
33

34  
35 13 <sup>5</sup> Sorbonne University, UPMC Univ Paris 06, INSERM, Pierre Louis Institute of Epidemiology  
36  
37 14 and Public Health (IPLESP UMRS 1136), 75012, Paris, France  
38

39  
40 15 <sup>6</sup>AP-HP, Bichat-Claude Bernard Hospital, Infectious and Tropical Diseases Department, F-75018  
41  
42 16 Paris, France  
43

44  
45 17 **Corresponding author:**

46  
47 18 Lidia Kardaś-Słoma  
48

49  
50  
51 19 University of Paris Diderot, Inserm-IAME, UMR 1137  
52

53  
54 20 16, rue Henri Huchard, 75018 Paris, France  
55

56  
57 21 E-mail address: [lidia.kardas@inserm.fr](mailto:lidia.kardas@inserm.fr)  
58  
59  
60

## 22 ABSTRACT

### 23 Objective

24 Several control strategies have been used to limit the transmission of multidrug-resistant  
25 organisms in hospitals. However, their implementation is expensive and effectiveness of  
26 interventions for the control of extended-spectrum beta-lactamase-producing Enterobacteriaceae  
27 (ESBL-PE) spread is controversial. Here we aim to assess the cost-effectiveness of hospital-based  
28 strategies to prevent ESBL-PE transmission and infections.

### 29 Design

30 Cost-effectiveness analysis based on dynamic, stochastic transmission model over a one-year  
31 time horizon.

### 32 Patients and setting

33 Patients hospitalized in a hypothetical 10- bed intensive care unit (ICU).

### 34 Interventions

35 Base case scenario compared to 1) universal strategies (e.g. improvement of hand hygiene (HH)  
36 among healthcare workers (HCWs), antibiotic stewardship), 2) targeted strategies (e.g. screening  
37 of patient for ESBL-PE at ICU admission and contact precautions or cohorting of carriers) and 3)  
38 mixed strategies (e.g. targeted approaches combined with antibiotic stewardship).

39 **Main Outcomes and Measures:** Cases of ESBL-PE transmission, infections, cost of  
40 intervention, cost of infections, incremental cost per infection avoided.

### 41 Results

42 In the base case scenario, 15 transmissions and 5 infections due to ESBL-PE occurred per 100  
43 ICU admissions, representing a mean cost of €94 792. All control strategies improved health

1  
2  
3 44 outcomes and reduced costs associated with ESBL-PE infections. The overall costs (cost of  
4  
5 45 intervention and infections) were the lowest for HH compliance improvement to 80%/80%.  
6  
7  
8 46 Two strategies required higher investments than the HH programme, but also improved health  
9  
10 47 benefits; 1) HH improvement to 80%/80% combined with antibiotic stewardship and 2) screening  
11  
12 48 and cohorting strategy combined with antibiotic stewardship.  
13  
14

## 15 **Conclusions**

16  
17 50 Improved compliance with HH was the most cost-saving strategy to prevent the transmission of  
18  
19 51 ESBL-PE. Adding antibiotic restriction to HH or screening and cohorting slightly improved their  
20  
21 52 effectiveness and may be worthy of consideration by decision-makers'.  
22  
23  
24

## 25 53

## 26 54 **Strength and limitations of this study**

- 27 55     ▪ We used a dynamic transmission model to take into account that the risk of colonization  
28  
29 56         in the ICU depends on the number of ESBL-PE carriers and could change over time.
- 30  
31 57     ▪ Parameters used in the model were derived from recent multicentre studies.
- 32  
33 58     ▪ We undertook sensitivity analyses to show the impact of uncertainty in parameter  
34  
35 59         estimation and the impact of model assumptions on the conclusions.
- 36  
37 60     ▪ Direct HCW-to-HCW transmissions as well as environmental contamination were not  
38  
39 61         included in the model.  
40  
41  
42  
43  
44  
45  
46  
47

## 48 63 **INTRODUCTION**

49  
50 64 The incidence of infection and colonization with extended-spectrum beta-lactamase-producing  
51  
52 65 *Enterobacteriaceae* (ESBL-PE) has increased worldwide. In Europe, in 2014, the percentage of  
53  
54 66 *Escherichia coli* and *Klebsiella pneumoniae* resistant to 3<sup>rd</sup> generation cephalosporins in invasive  
55  
56  
57  
58  
59  
60

1  
2  
3 67 isolates was 12% and 23%, respectively<sup>1</sup>. A similar trend was observed in the United States,  
4  
5 68 although with large variations between states<sup>2</sup>.

6 69 In hospital settings, ESBL-PE acquisition is mainly due to indirect transmission between patients  
7  
8 70 with the hands of healthcare workers (HCWs) as vectors. Increased prevalence of colonization  
9  
10 71 augments the risk of acquiring ESBL-PE infection<sup>3</sup>. Such infections represent a serious socio-  
11  
12 72 economic burden and are associated with a raised mortality, a longer hospitalization, and  
13  
14 73 additional costs<sup>4</sup>.

15 74 Many interventions have been proposed to limit the transmission of multidrug-resistant  
16  
17 75 organisms (MDROs) in hospitals. They can be classified as either 1) a 'universal' or 'horizontal'  
18  
19 76 approach, applied to all patients e.g. improvement of hand hygiene (HH) among HCWs or  
20  
21 77 antibiotic stewardship or 2) a 'targeted' or 'vertical' approach, e.g. screening and isolation of  
22  
23 78 asymptomatic carriers in addition to infected patients, with the aim of identifying carriers and  
24  
25 79 implementing measures to prevent the transmission from carriers to other patients<sup>5</sup>.

26  
27 80 There is general agreement that HH reduces the transmission of MDROs, especially MRSA<sup>3</sup>.  
28  
29 81 However, few studies have evaluated the impact of HH on the prevention of ESBL-PE  
30  
31 82 dissemination and, so far, most of those studies have not provided evidence of HH benefit<sup>6</sup>, with  
32  
33 83 the exception of one recently published study<sup>7</sup>. The effectiveness of targeted measures in  
34  
35 84 controlling the spread of MDROs, and especially ESBL-PE, remains controversial. This approach  
36  
37 85 is mainly recommended in high-risk units, e.g. intensive care units (ICUs)<sup>8</sup>.

38  
39 86 The implementation of interventions with demonstrated effectiveness in reducing ESBL-PE  
40  
41 87 infections is associated with costs that are generally supported by hospitals. However, when  
42  
43 88 evaluating implementation of an infection prevention programme, one should also take into  
44  
45 89 account savings associated with these interventions, but this has been largely ignored in previous  
46  
47 90 studies.

1  
2  
3 91 In this study, we used a mathematical model to evaluate the effectiveness and cost-effectiveness  
4  
5 92 of universal and targeted control strategies for the prevention of ESBL-PE transmission in an  
6  
7  
8 93 ICU in a high-income country.  
9

10 94

## 13 95 **METHODS**

### 16 96 The model

17  
18 97 We extended a previously described stochastic, compartmental and dynamic model of ESBL-PE  
19  
20  
21 98 transmission<sup>9</sup> to assess the economic impact of infection control strategies implemented in a  
22  
23 99 hypothetical, ICU setting over a one-year time horizon.

24  
25  
26 100 The model simulated the spread of ESBL-PE among patients through contacts with HCWs in an  
27  
28 101 ICU, taking into account hospital admissions and discharges of patients, antibiotic exposure, and  
29  
30 102 control interventions (**Figure 1**).

31  
32  
33 103 The **Supplementary Text S1** provides details of the model and its assumptions.

### 35 104 **Model simulations and outcomes**

36  
37 105 Simulations of the model were performed using Gillespie's method and programmed in C++  
38  
39 106 language. The outcomes (cases of ESBL-PE transmission, infections, cost of intervention, cost of  
40  
41 107 infections) were calculated after a period of 1 year and averaged over the 1,000 Monte Carlo  
42  
43 108 simulations. Cost-effectiveness analysis and graphics were performed in R<sup>10</sup>.  
44  
45  
46

47 109

### 50 110 Base case scenario

51  
52 111 In the base case scenario, with no control intervention, we considered that compliance with hand  
53  
54 112 hygiene before/after contact with a patient was 55%/60% respectively<sup>11</sup> and 56% of patients  
55  
56 113 received antibiotics at ICU admission<sup>12</sup>.  
57  
58  
59  
60

1  
2  
3 114 Infection control strategies  
4  
5

6 115 **Universal approaches**  
7

8 116 We evaluated control strategies implemented in all patients (independently of their colonization  
9 status), that comprised one or both of the following interventions: 1) improved compliance with  
10 117 HH, and 2) antibiotic stewardship. For HH, we considered different levels of compliance. First,  
11 118 compliance with HH before/after contact with a patient was improved from 55%/60% at baseline  
12 119 to 55%/80% or 80%/80%. Second, antibiotic stewardship resulted in halving the proportion of  
13 120 patients on antibiotics at ICU admission and in reducing by 25% the duration of antibiotic  
14 121 treatment.  
15 122  
16 123  
17  
18  
19  
20  
21  
22  
23  
24  
25  
26

27 124 **Targeted approaches**  
28

29 125 We evaluated 2 strategies that combined screening of patients for ESBL-PE at ICU admission  
30 126 and one of the following interventions implemented: 1) contact precautions (improved  
31 127 compliance with HH before/after contact with carriers to 80%/80%); or 2) cohorting of ESBL-PE  
32 128 carriers with dedicated HCWs. HH compliance for other patients was maintained at baseline  
33 129 level.  
34  
35  
36  
37  
38  
39  
40  
41  
42  
43

44 131 **Mixed approaches**  
45

46 132 We evaluated two strategies combining the targeted approaches with antibiotic stewardship.  
47  
48 133

49  
50  
51 134 Model parameters  
52

53  
54 135 Model parameters and their values are presented in **Supplementary Table 1**.  
55  
56  
57  
58  
59  
60



1  
2  
3 136 Based on recent French data, we assumed that 15% of patients were colonized with ESBL-PE at  
4  
5 137 ICU admission<sup>13</sup>.  
6  
7  
8 138 Infection status was not included in the model, so we estimated the number of infections by  
9  
10 139 multiplying the cumulated number of colonized patients after one year by the probability of  
11  
12 140 developing an infection during an ICU stay, set at 16.4%<sup>14</sup>. Even though this value came from a  
13  
14  
15 141 recent large multicentre study, we also considered the impact of lower (8%) and higher (30%)  
16  
17 142 probability of infection in alternative analyses.  
18  
19  
20 143

#### 21 22 144 Costs

23  
24 145 The analysis was performed from a public hospital perspective. Cost estimates are based on  
25  
26 146 values reported in Euros from 2015 (1 € = US \$0.94). We considered the following costs in the  
27  
28 147 model: 1) costs of intervention (material resources and personnel costs), 2) costs of ESBL-PE  
29  
30 148 infections. The cost of an ESBL-PE infection was estimated using the ESBL-PE-attributable LOS  
31  
32 149 and the cost of a hospital bed-day for infected patients<sup>13,15,16</sup>. See **Table 1** for cost parameters and  
33  
34  
35 150 **Supplementary Text 1** for more details.  
36  
37  
38 151

#### 39 40 41 152 Cost-effectiveness evaluation

42  
43 153 To conduct the cost-effectiveness<sup>17</sup>, we estimated the costs associated with each intervention  
44  
45 154 implemented, and the health benefits were related to the number of avoided cases of ESBL-PE  
46  
47 155 infections. First, we determined whether any strategy was dominated by another in terms of costs  
48  
49 156 and health benefits. Second, we determined whether any strategy was dominated through  
50  
51 157 principles of extended dominance (i.e. whether the incremental cost-effectiveness ratios  
52  
53 158 [ICERs] decrease as the strategies increases in cost<sup>17,18</sup>). Finally, for the non-dominated strategies,  
54  
55  
56  
57  
58  
59  
60

1  
2  
3 159 we calculated the incremental cost per case of infection avoided, which is the ratio of the  
4  
5 160 difference in costs between two strategies to the difference in health benefits. This process  
6  
7  
8 161 produces an “efficient frontier” indicating more costly, but more effective strategies.  
9  
10  
11 162

### 12 13 Sensitivity analysis

14  
15 164 We performed supplementary analyses to assess the impact of parameter uncertainty on the  
16  
17  
18 165 model’s predictions. We first ran a univariate sensitivity analysis to evaluate the cost-  
19  
20 166 effectiveness of strategies in settings with either low or high prevalence of patients colonized at  
21  
22 167 admission (from 5% to 50%). We also considered the impact of a lower (8%) and a higher (30%)  
23  
24 168 probability of infection in colonized patients. We then investigated the model assuming 1) a  
25  
26 169 lower baseline compliance with HH and 2) a lower sensitivity of the screening method used to  
27  
28  
29 170 detect ESBL-PE carriers at ICU admission.  
30  
31  
32 171

33  
34 172 We also performed an analysis to explore the uncertainty in human time required in an HH  
35  
36 173 programme and its potential effects. In this analysis, we varied the time an infection control nurse  
37  
38 174 works on the programme (quarter-time, half-time or full-time) simultaneously with the level of  
39  
40 175 HH compliance achieved (from 55%/60% to 80%/80% before after contact).  
41  
42  
43 176

44  
45  
46 177 Finally, we performed a probabilistic sensitivity analysis to explore the effect of joint uncertainty  
47  
48 178 across parameters on the cost-effectiveness of universal vs targeted strategies. We varied the  
49  
50 179 following parameters concurrently: 1) number of HCW contacts with patients, 2) transmission  
51  
52 180 parameters, 3) length of stay of ICU patients, 4) natural decontamination rate for HCW, 5)  
53  
54 181 antibiotic initiation rate, 6) prevalence of ESBL-PE carriage among patients admitted to the ICU,  
55  
56  
57  
58  
59  
60

1  
2  
3 182 7) death rate of patients, 8) probability of infection in colonized patients and 9) cost parameters.  
4  
5 183 We randomly sampled values from each of the parameter distributions and calculated the mean  
6  
7  
8 184 costs and mean number of infections for each strategy (averaged over 1,000 simulations).  
9  
10  
11 185

## 12 13 186 **RESULTS**

14  
15 187 In the absence of control interventions (base case strategy), 15 new acquisitions (i.e.  
16  
17 188 transmissions) and 5 new infections due to ESBL-PE occurred per 100 admissions. Compared to  
18  
19 189 the base case (Strategy 1), all strategies reduced ESBL-PE acquisition and infections within one  
20  
21 190 year (**Figure 2**).

22  
23  
24 191 Among universal strategies, HH compliance improvement to 80%/80% (Strategy 2) was the most  
25  
26 192 effective, resulting in a mean reduction to 2.9 acquired infections per 100 admissions. Among  
27  
28 193 targeted strategies, screening of patients on admission and cohorting of carriers (Strategy 6) was  
29  
30 194 the most effective strategy and resulted in a mean reduction to 2.8 infections per 100 admissions.  
31  
32 195 Screening followed by contact precautions (Strategy 5) was the least effective in comparison with  
33  
34 196 all other options. Adding antibiotic stewardship to HH or targeted strategies only slightly  
35  
36 197 improved their effectiveness.  
37  
38  
39  
40  
41  
42

### 43 44 199 **Cost-saving analysis**

45  
46 200 In **Table 2** we present the estimated costs and outcomes over one year for all strategies. The  
47  
48 201 mean total cost associated with the base case strategy was estimated at €105 344/100 admissions,  
49  
50 202 €94 792 of which was related to infections and €10 552 to interventions. Investments in infection  
51  
52 203 prevention was always cost-saving because they avoided cases of ESBL-PE infections and thus  
53  
54 204 costs associated with these infections. For instance, when HH compliance was improved to  
55  
56  
57  
58  
59  
60

1  
2  
3 205 80%/80%, the mean cost of the strategy implementation increased to €25 639/100 admissions,  
4  
5 206 but the costs related to infections decreased to €54 916, resulting in an overall monetary benefit  
6  
7  
8 207 of €24 788/100 admissions in comparison with the base case. This strategy was associated with  
9  
10 208 the highest savings within all evaluated strategies.  
11  
12

13 209

### 14 210 **Cost-effectiveness analysis**

15  
16  
17 211 HH compliance improvement to 80%/80% was the least expensive strategy. However, two  
18  
19 212 strategies required higher investments than the HH programme, but also improved health  
20  
21 213 benefits. To help choose between strategies we calculated the incremental cost-effectiveness ratio  
22  
23 214 (**Figure 3**). The ICER of HH improvement to 80%/80% and antibiotic stewardship (Strategy 7)  
24  
25 215 vs. HH compliance improvement to 80%/80% was estimated at €49 025/avoided infection (**Table**  
26  
27 216 **2**). The ICER of screening, cohorting and antibiotic stewardship (Strategy 10) vs. HH  
28  
29 217 improvement to 80%/80% and antibiotic stewardship was estimated at €62 005/avoided infection.  
30  
31  
32 218 Other strategies were dominated (more expensive and less effective).  
33  
34  
35

36 219

### 37 220 **Sensitivity analysis**

38  
39 221 Findings from sensitivity analysis showed the robustness of predictions to: 1) the lower/higher  
40  
41 222 prevalence of ESBL-PE carriage on ICU admission, 2) the lower/higher probability of infections  
42  
43 223 in colonized patients, 3) the baseline compliance with HH lower than in our core analysis  
44  
45 224 (20%/40%), and 4) the lower sensitivity to detect ESBL-PE carriers at ICU admission. Results of  
46  
47 225 this analysis are shown in **Supplementary Text 2** (Figure S1 and Table S1, Table S2 A and B,  
48  
49 226 Table S3, and Figure S2).  
50  
51  
52

53 227  
54  
55  
56  
57  
58  
59  
60

1  
2  
3 228 In a second sensitivity analysis, we focused on human time and performance to improve HH  
4  
5 229 compliance. If an infection control nurse was assumed to work quarter-time, half-time or full-  
6  
7 230 time on the programme, the HH compliance had to increase by at least 5%, 7.5% or 15%,  
8  
9 231 respectively, to make the programme cost saving compared to the base case (**Supplementary**  
10  
11 232 **Table S4A**).

12  
13  
14  
15 233 In comparison with the screening and cohorting strategy, the HH improvement was cost-saving  
16  
17 234 when an infection control nurse worked quarter-time or half-time on the programme, and HH  
18  
19 235 compliance increased by at least 12.5% or 17.5%, respectively. The screening and cohorting  
20  
21 236 strategy dominated the HH improvement programme when an infection control nurse was  
22  
23 237 working full-time on the programme (**Supplementary Table S4B**).

24  
25  
26  
27 238  
28  
29 239 Finally, the probabilistic sensitivity analysis showed that improvement of HH to 80%/80%  
30  
31 240 (Strategy 2) was less expensive than the screening and cohorting intervention (Strategy 6) in 91%  
32  
33 241 of simulations. Among them, in 42% of simulations, the HH strategy was less expensive but  
34  
35 242 more effective (dominated the Strategy 6), and in 49% of runs the screening and cohorting was  
36  
37 243 more effective and more expensive (**Supplementary Figure S3**). Screening and contact  
38  
39 244 precautions (Strategy 5) were always less effective than improvement of HH to 80%/80%  
40  
41 245 (Strategy 2) (**Supplementary Figure S4**).

42  
43  
44  
45  
46 246

## 47 48 49 247 **DISCUSSION**

50  
51 248 The impact of infection control strategies for preventing ESBL-PE transmission is controversial  
52  
53 249 because clinical studies cannot account for the multiple confounding factors, notably both  
54  
55 250 infection control measures and antibiotic stewardship. Despite several recent high-level  
56  
57  
58  
59  
60

1  
2  
3 251 interventional studies (Climo et al.<sup>19</sup>; Derde et al.<sup>6</sup>; Huang et al.<sup>20</sup>), the most effective and cost-  
4  
5 252 effective interventions for controlling MDROs are still debated. Since the spread of ESBL-PE  
6  
7  
8 253 between patients is a dynamic and complex process, modelling can help for understanding the  
9  
10 254 transmission mechanisms and deciding which intervention are to be preferred (Doan et al.<sup>21</sup>;  
11  
12 255 Grundmann et al.<sup>22</sup>).

13  
14  
15 256 Our model estimated the annual burden of ESBL-PE infections in a French ICU at €94 792 per  
16  
17 257 100 admissions in the base case strategy. Several prior studies have reported the cost of infections  
18  
19 258 due to multidrug resistant organisms in the ICU<sup>23-26</sup>. However, even though all authors  
20  
21 259 underlined the high costs of infections, comparison between studies remains difficult. Estimated  
22  
23 260 costs varied according to the country, but also to the population studied, e.g. patients with site-  
24  
25 261 specific or microorganism-specific infections. Moreover, the methods used to estimate the costs  
26  
27  
28  
29 262 were not similar in all publications.

30  
31  
32  
33 263 Implementation of infection control programmes may reduce the high cost of healthcare-  
34  
35 264 associated infections. However, when evaluating the cost-effectiveness and benefits of such  
36  
37 265 programmes, it is crucial to consider their cost.

38  
39  
40 266 In recent years, mathematical models have increasingly been used to study the cost-effectiveness  
41  
42 267 of control strategies. For example, Robotham et al.<sup>27</sup> compared a wide range of strategies to  
43  
44 268 control MRSA transmission in ICUs and found that universal decolonization was the most cost-  
45  
46 269 effective option. In another study, Gidengil et al.<sup>28</sup> compared hospital strategies to prevent MRSA  
47  
48 270 transmission and infections in an ICU. They confirmed that universal decolonization was the  
49  
50  
51 271 most cost-saving strategy.  
52  
53  
54  
55  
56  
57  
58  
59  
60

1  
2  
3 272 Our study is the first to compare the effectiveness and the costs of universal and targeted control  
4  
5 273 strategies in the context of the spread of ESBL-PE in ICUs. Our model predicted that improving  
6  
7  
8 274 HH to 80%/80% in contacts with all patients would prevent 83% of ESBL-PE acquisitions and  
9  
10 275 avoid at least two out of five infections per 100 admissions. This strategy represented the most  
11  
12 276 cost-saving, with a monetary benefit of €24 788 per 100 admissions.

13  
14  
15 277 The association between HH and reduction of MDROs infections has long been known and HH  
16  
17 278 has been accepted as a crucial component of infection prevention. HH has in addition the benefit  
18  
19 279 of being effective for reducing transmission of many resistant or susceptible bacteria. A recent  
20  
21 280 publication reported that a programme designed to control MRSA by implementing universal  
22  
23 281 components in addition to screening and contact precautions for MRSA carriers also effectively  
24  
25 282 reduced the incidence of resistant gram-negative bacteria, the most likely being ESBL-PE<sup>7</sup>. Thus,  
26  
27 283 the overall economic benefit of an HH programme for the hospital might be greater than reported  
28  
29 284 in our study.

30  
31  
32 285 Despite the confirmed effectiveness of HH and national and international recommendations,  
33  
34 286 compliance with HH remains low and is often lower than values used in our base case  
35  
36 287 analysis<sup>29,30</sup>. However, we showed in a sensitivity analysis that improving HH remained the most  
37  
38 288 cost-saving strategy even in a low baseline compliance scenario.

39  
40  
41 289  
42  
43 290 Different strategies have been suggested to improve HH in hospitals<sup>31</sup>, but the evidence-based  
44  
45 291 approach is still lacking. Recently, a revue<sup>32</sup> concluded that a multimodal strategy proposed by  
46  
47 292 the WHO and consisting of five components: 1) system change, 2) training and education, 3)  
48  
49 293 observation and feedback, 4) reminders in the hospital, and 5) a hospital safety climate, was  
50  
51 294 effective at increasing HH among HCWs. Moreover, the authors underlined that additional

1  
2  
3 295 measures (e.g. reward incentives for reaching a certain level of compliance) could lead to further  
4  
5  
6 296 improvements. In our study, we assumed that a key component of an HH programme was a  
7  
8 297 dedicated staff working on the programme (i.e. HH education, observation and feedback). We  
9  
10 298 hypothesized, for example, that to improve HH compliance an infection control nurse working  
11  
12 299 half-time would be sufficient. However, to explore the uncertainty of the required time dedicated  
13  
14 300 to the HH programme and its expected effects, we performed a sensitivity analysis.  
15  
16  
17  
18 301

19  
20 302 Screening strategies have been used to prevent transmission of MDROs, however their  
21  
22 303 effectiveness and cost-effectiveness have been largely debated. In this study, we showed, that in  
23  
24 304 endemic settings, screening and cohorting strategy had comparable efficacy as HH but was more  
25  
26 305 expensive and dominated by other control options. We can hypothesize that in the case of highly  
27  
28 306 resistant bacteria (e.g. Carbapenem-resistant *Enterobacteriaceae*) where there is a highest clinical  
29  
30 307 impact on the outcomes of infected patients, given the lack of therapeutic options, a rapid  
31  
32 308 identification and cohorting of carriers may be more beneficial from the hospital but also societal  
33  
34 309 perspective.  
35  
36  
37  
38

39 310 While antibiotic use is the major driver for the selection of antibiotic-resistant bacteria, there is  
40  
41 311 no clear evidence of the effectiveness of antimicrobial restriction policies on resistance<sup>33</sup>. We  
42  
43 312 assumed in the model that a reduction in antibiotic use acted in 2 ways: it decreased the  
44  
45 313 colonization probability of uncolonized patients and the probability of transmission from  
46  
47 314 colonized patients to HCWs. However, we found that reducing antibiotic use was less effective  
48  
49 315 than HH or a screening and cohorting strategy. Under the hypotheses used in our model, we also  
50  
51 316 demonstrated in a previous study through sensitivity analyses that antibiotic parameters did not  
52  
53 317 significantly influence the effectiveness of interventions<sup>9</sup>.  
54  
55  
56  
57  
58  
59  
60



1  
2  
3 318 However, adding antibiotic stewardship to an HH strategy slightly improved its effectiveness and  
4  
5 319 may be worthy of consideration if the decision-makers are willing to pay at least €49 025 per  
6  
7  
8 320 infection avoided (we calculated that it would be equivalent to €5 562 per life-year gained  
9  
10 321 (LYG)). Combining antibiotic stewardship with screening and cohorting was even more effective  
11  
12 322 than combining HH and antibiotic stewardship, but with an additional cost of €62 005 per  
13  
14 323 infection avoided (or €7 030/LYG).

15  
16  
17  
18 324 Our study has several strengths. Firstly, we used a dynamic model to represent interactions  
19  
20 325 between patients and HCWs and to take into account that the risk of colonization in the ICU  
21  
22 326 depends on the number of ESBL carriers and could change over time. Moreover, our model  
23  
24 327 incorporated the key elements of ESBL-PE transmission, such as the impact of prevalence at  
25  
26 328 admission or antibiotic treatment. Secondly, we used input parameters derived from recent  
27  
28 329 multicentre studies. Thirdly, we estimated the cost of HCW according to the time they spend  
29  
30 330 working on the programme based on the best evidence from the literature and expert opinion.  
31  
32 331 Finally, we assessed the impact of uncertainty in parameter estimation and the impact of model  
33  
34 332 assumptions on the model's predictions by performing multiple sensitivity analyses.

35  
36  
37  
38 333 Our study also has several limitations. Firstly, ICU parameters and costs were based mostly on  
39  
40 334 French data, and ESBL-PE infections, prevalence, compliance with control measures and costs  
41  
42 335 may be different in other countries. Secondly, we modelled an ICU as a single-room unit where  
43  
44 336 transmission among patients results via contacts with HCWs. In the absence of detailed  
45  
46 337 information on transmission of ESBL-PE in hospital wards, we ignored direct HCW-to-HCW  
47  
48 338 transmissions as well as environmental contamination. Finally, ESBL-PE acquisition in the ICU  
49  
50 339 can lead to transmission from an ICU-acquired case and infection in downstream units, thus  
51  
52 340 increasing costs of hospitalization. Our cost evaluation was therefore conservative, since  
53  
54  
55  
56  
57  
58  
59  
60

1  
2  
3 341 transmission and infection after ICU discharge were not added to the global costs of infections. A  
4  
5 342 ward-based model, including other hospital units, should be tested.  
6  
7

8 343

## 10 344 **CONCLUSION**

11  
12  
13 345 Our study suggests that a universal approach with improved compliance with HH was the most  
14  
15 346 cost-saving strategy to prevent the transmission of ESBL-PE in an ICU setting. Screening and  
16  
17 347 cohorting of carriers had comparable effectiveness to HH improvement, but was more expensive.  
18  
19 348 Adding antibiotic restriction to the HH or the screening and cohorting strategies slightly  
20  
21 349 improved their effectiveness and may be worthy of consideration by decision-makers.  
22  
23  
24

25 350

## 27 351 **ACKNOWLEDGMENTS**

28  
29  
30 352 We thank Dr. Laurence Armand for useful discussion on our study.  
31  
32

33 353

## 35 354 **FOOTNOTES**

36  
37  
38 355 **Contributors:** YY, JCL, CP and LKS designed the study. YY, JCL, PYB, AA, CP and LKS  
39  
40 356 contributed to the development of the model. CP, AP, GB, ER and LKS collected the data. CP  
41  
42 357 and LKS wrote the code. LKS conducted computer simulations and result analysis. LKS, JCL  
43  
44 358 and YY drafted the manuscript. All authors read and critically revised the manuscript.

45  
46  
47 359 **Funding:** This work was supported by the French government (PREPS program [grant number  
48  
49 360 13-0693]) and by the National Institute for Health and Medical Research (INSERM).  
50

51  
52 361 **Competing interests:** None declared.  
53

54  
55 362 **Data sharing statement:** Details of the computer code for the model are available from the  
56  
57 363 corresponding author.  
58  
59  
60

364

365 **REFERENCES**

- 366 1 European Centre for Disease Prevention and Control (ECDC). SURVEILLANCE REPORT:  
367 Antimicrobial resistance surveillance in Europe 2014.  
368 <http://ecdc.europa.eu/en/publications/publications/antimicrobial-resistance-europe-2014.pdf>  
369 (accessed Sept 30, 2016).
- 370 2 Centers for Disease Control and Prevention (CDC). Antibiotic Resistance Patient Safety Atlas.  
371 Summary of Results. [http://gis.cdc.gov/grasp/PSA/Downloads/ARPatientSafetyAtlas-](http://gis.cdc.gov/grasp/PSA/Downloads/ARPatientSafetyAtlas-SummaryofResults.pdf)  
372 [SummaryofResults.pdf](http://gis.cdc.gov/grasp/PSA/Downloads/ARPatientSafetyAtlas-SummaryofResults.pdf) (accessed Sept 30, 2016).
- 373 3 World Health Organization. Evidence of hand hygiene to reduce transmission and infections  
374 by multi-drug resistant organisms in health-care settings.  
375 [http://www.who.int/gpsc/5may/MDRO\\_literature-review.pdf](http://www.who.int/gpsc/5may/MDRO_literature-review.pdf) (accessed Sept 7, 2016).
- 376 4 Gandra S, Barter DM, Laxminarayan R. Economic burden of antibiotic resistance: how much  
377 do we really know? *Clin Microbiol Infect Off Publ Eur Soc Clin Microbiol Infect Dis* 2014;  
378 **20**: 973–80.
- 379 5 Septimus E, Weinstein RA, Perl TM, Goldmann DA, Yokoe DS. Approaches for preventing  
380 healthcare-associated infections: go long or go wide? *Infect Control Hosp Epidemiol* 2014; **35**  
381 **Suppl 2**: S10-14.
- 382 6 Derde LPG, Cooper BS, Goossens H, *et al.* Interventions to reduce colonisation and  
383 transmission of antimicrobial-resistant bacteria in intensive care units: an interrupted time  
384 series study and cluster randomised trial. *Lancet Infect Dis* 2014; **14**: 31–9.

- 1  
2  
3 385 7 Goto M, O'Shea AMJ, Livorsi DJ, *et al.* The Effect of a Nationwide Infection Control  
4  
5 386 Program Expansion on Hospital-Onset Gram-Negative Rod Bacteremia in 130 Veterans  
6  
7  
8 387 Health Administration Medical Centers: An Interrupted Time-Series Analysis. *Clin Infect Dis*  
9  
10 388 *Off Publ Infect Dis Soc Am* 2016; **63**: 642–50.
- 11  
12  
13  
14 389 8 Otter JA, Mutters NT, Tacconelli E, Gikas A, Holmes AH. Controversies in guidelines for the  
15  
16 390 control of multidrug-resistant Gram-negative bacteria in EU countries. *Clin Microbiol Infect*  
17  
18 391 *Off Publ Eur Soc Clin Microbiol Infect Dis* 2015; **21**: 1057–66.
- 19  
20  
21  
22 392 9 Pelat C, Kardaś-Słoma L, Birgand G, *et al.* Hand Hygiene, Cohorting, or Antibiotic Restriction  
23  
24 393 to Control Outbreaks of Multidrug-Resistant Enterobacteriaceae. *Infect Control Hosp*  
25  
26 394 *Epidemiol* 2016; **37**: 272–80.
- 27  
28  
29  
30 395 10 R Core Team. R: The R Project for Statistical Computing. <https://www.r-project.org/> (accessed  
31  
32 396 Sept 15, 2016).
- 33  
34  
35  
36 397 11 Venier AG, Zaro-Goni D, Pefau M, *et al.* Performance of hand hygiene in 214 healthcare  
37  
38 398 facilities in South-Western France. *J Hosp Infect* 2009; **71**: 280–2.
- 39  
40  
41  
42 399 12 REA-Raisin network. Surveillance des infections nosocomiales en réanimation adulte / 2012 /  
43  
44 400 Maladies infectieuses / Rapports et synthèses / Publications et outils / Accueil.  
45  
46 401 <http://invs.santepubliquefrance.fr/Publications-et-outils/Rapports-et-syntheses/Maladies->  
47  
48 402 [infectieuses/2012/Surveillance-des-infections-nosocomiales-en-reanimation-adulte](http://invs.santepubliquefrance.fr/Publications-et-outils/Rapports-et-syntheses/Maladies-) (accessed  
49  
50 403 Sept 15, 2016).
- 51  
52  
53  
54  
55  
56  
57  
58  
59  
60

- 1  
2  
3 404 13 Razazi K, Derde LPG, Verachten M, Legrand P, Lesprit P, Brun-Buisson C. Clinical impact  
4  
5 405 and risk factors for colonization with extended-spectrum  $\beta$ -lactamase-producing bacteria in the  
6  
7 406 intensive care unit. *Intensive Care Med* 2012; **38**: 1769–78.
- 8  
9  
10  
11 407 14 Barbier F, Pommier C, Essaïed W, *et al.* Colonization and infection with extended-spectrum  $\beta$ -  
12  
13 408 lactamase-producing Enterobacteriaceae in ICU patients: what impact on outcomes and  
14  
15 409 carbapenem exposure? *J Antimicrob Chemother* 2016; **71**: 1088–97.
- 16  
17  
18  
19 410 15 Viau R, Frank KM, Jacobs MR, *et al.* Intestinal Carriage of Carbapenemase-Producing  
20  
21 411 Organisms: Current Status of Surveillance Methods. *Clin Microbiol Rev* 2016; **29**: 1–27.
- 22  
23  
24  
25 412 16 Vasudevan A, Memon BI, Mukhopadhyay A, Li J, Tambyah PA. The costs of nosocomial  
26  
27 413 resistant gram negative intensive care unit infections among patients with the systemic  
28  
29 414 inflammatory response syndrome- a propensity matched case control study. *Antimicrob Resist*  
30  
31 415 *Infect Control* 2015; **4**: 3.
- 32  
33  
34  
35 416 17 Briggs A, Claxton K, Sculpher M. Decision modelling for health economic evaluation. Oxford  
36  
37 417 University Press, 2006 <https://www.york.ac.uk/che/publications/books/decision-modelling/>  
38  
39 418 (accessed Sept 6, 2016).
- 40  
41  
42  
43 419 18 Cantor SB, Ganiats TG. Incremental cost-effectiveness analysis: the optimal strategy depends  
44  
45 420 on the strategy set. *J Clin Epidemiol* 1999; **52**: 517–22.
- 46  
47  
48  
49 421 19 Climo MW, Yokoe DS, Warren DK, *et al.* Effect of daily chlorhexidine bathing on hospital-  
50  
51 422 acquired infection. *N Engl J Med* 2013; **368**: 533–42.
- 52  
53  
54  
55 423 20 Huang SS, Septimus E, Kleinman K, *et al.* Targeted versus universal decolonization to prevent  
56  
57 424 ICU infection. *N Engl J Med* 2013; **368**: 2255–65.

- 1  
2  
3 425 21 Doan TN, Kong DCM, Kirkpatrick CMJ, McBryde ES. Optimizing hospital infection control:  
4  
5 426 the role of mathematical modeling. *Infect Control Hosp Epidemiol* 2014; **35**: 1521–30.  
6  
7  
8  
9 427 22 Grundmann H, Hellriegel B. Mathematical modelling: a tool for hospital infection control.  
10  
11 428 *Lancet Infect Dis* 2006; **6**: 39–45.  
12  
13  
14  
15 429 23 Chaix C, Durand-Zaleski I, Alberti C, Brun-Buisson C. Control of endemic methicillin-  
16  
17 430 resistant *Staphylococcus aureus*: a cost-benefit analysis in an intensive care unit. *JAMA* 1999;  
18  
19 431 **282**: 1745–51.  
20  
21  
22  
23 432 24 Roberts RR, Hota B, Ahmad I, *et al.* Hospital and societal costs of antimicrobial-resistant  
24  
25 433 infections in a Chicago teaching hospital: implications for antibiotic stewardship. *Clin Infect*  
26  
27 434 *Dis Off Publ Infect Dis Soc Am* 2009; **49**: 1175–84.  
28  
29  
30  
31 435 25 Mauldin PD, Salgado CD, Hansen IS, Durup DT, Bosso JA. Attributable hospital cost and  
32  
33 436 length of stay associated with health care-associated infections caused by antibiotic-resistant  
34  
35 437 gram-negative bacteria. *Antimicrob Agents Chemother* 2010; **54**: 109–15.  
36  
37  
38  
39 438 26 Lee SY, Kotapati S, Kuti JL, Nightingale CH, Nicolau DP. Impact of extended-spectrum beta-  
40  
41 439 lactamase-producing *Escherichia coli* and *Klebsiella* species on clinical outcomes and hospital  
42  
43 440 costs: a matched cohort study. *Infect Control Hosp Epidemiol* 2006; **27**: 1226–32.  
44  
45  
46  
47 441 27 Robotham JV, Graves N, Cookson BD, *et al.* Screening, isolation, and decolonisation  
48  
49 442 strategies in the control of methicillin resistant *Staphylococcus aureus* in intensive care units:  
50  
51 443 cost effectiveness evaluation. *BMJ* 2011; **343**: d5694.  
52  
53  
54  
55  
56  
57  
58  
59  
60

- 1  
2  
3 444 28Gidengil CA, Gay C, Huang SS, Platt R, Yokoe D, Lee GM. Cost-effectiveness of strategies to  
4  
5 445 prevent methicillin-resistant *Staphylococcus aureus* transmission and infection in an intensive  
6  
7 446 care unit. *Infect Control Hosp Epidemiol* 2015; **36**: 17–27.
- 8  
9  
10  
11 447 29Scheithauer S, Haefner H, Schwanz T, *et al.* Compliance with hand hygiene on surgical,  
12  
13 448 medical, and neurologic intensive care units: direct observation versus calculated disinfectant  
14  
15 449 usage. *Am J Infect Control* 2009; **37**: 835–41.
- 16  
17  
18  
19 450 30Cepeda JA, Whitehouse T, Cooper B, *et al.* Isolation of patients in single rooms or cohorts to  
20  
21 451 reduce spread of MRSA in intensive-care units: prospective two-centre study. *Lancet Lond*  
22  
23 452 *Engl* 2005; **365**: 295–304.
- 24  
25  
26  
27 453 31Pittet D, Hugonnet S, Harbarth S, *et al.* Effectiveness of a hospital-wide programme to  
28  
29 454 improve compliance with hand hygiene. Infection Control Programme. *Lancet Lond Engl*  
30  
31 455 2000; **356**: 1307–12.
- 32  
33  
34  
35 456 32Luangasanatip N, Hongsuwan M, Limmathurotsakul D, *et al.* Comparative efficacy of  
36  
37 457 interventions to promote hand hygiene in hospital: systematic review and network meta-  
38  
39 458 analysis. *BMJ* 2015; **351**: h3728.
- 40  
41  
42  
43 459 33Smith, R.D., Coast, J., Millar, M.R., Wilton P., Karcher, A-M. Interventions against an  
44  
45 460 antibiotic resistance: A review of the literature and exploration of modelling cost-  
46  
47 461 effectiveness. A report prepared for the Global Forum for Health Research. World Health  
48  
49 462 Organization [http://announcementsfiles.cohred.org/gfhr\\_pub/assoc/s14820e/s14820e.pdf](http://announcementsfiles.cohred.org/gfhr_pub/assoc/s14820e/s14820e.pdf)  
50  
51 463 (accessed Sept 21, 2016).
- 52  
53  
54  
55  
56  
57  
58  
59  
60

- 1  
2  
3 464 34 Girard R, Aupee M, Erb M, Bettinger A, Jouve A. Hand rub dose needed for a single  
4  
5 465 disinfection varies according to product: a bias in benchmarking using indirect hand hygiene  
6  
7 466 indicator. *J Epidemiol Glob Health* 2012; **2**: 193–8.
- 8  
9  
10  
11 467 35 Kaier K. Economic implications of the dynamic relationship between antibiotic use and  
12  
13 468 hospital-acquired infections. *Value Health J Int Soc Pharmacoeconomics Outcomes Res* 2012;  
14  
15 469 **15**: 87–93.
- 16  
17  
18  
19 470 36 Armand L. Place des nouvelles techniques dans l'optimisation diagnostique et thérapeutique  
20  
21 471 des infections nosocomiales en réanimation. [http://cclin-sudest.chu-](http://cclin-sudest.chu-lyon.fr/Reseaux/REA/Journee/2014/6_Bacterio_NouveauxOutils.pdf)  
22  
23 472 [lyon.fr/Reseaux/REA/Journee/2014/6\\_Bacterio\\_NouveauxOutils.pdf](http://cclin-sudest.chu-lyon.fr/Reseaux/REA/Journee/2014/6_Bacterio_NouveauxOutils.pdf) (accessed Sept 6, 2016).
- 24  
25  
26  
27 473 37 Birgand G, Ruimy R, Schwarzinger M, *et al.* Rapid detection of glycopeptide-resistant  
28  
29 474 enterococci: impact on decision-making and costs. *Antimicrob Resist Infect Control* 2013; **2**:  
30  
31 475 30.
- 32  
33  
34  
35 476



1  
2  
3 477 **FIGURE LEGENDS**

4  
5 478 **Figure 1.** Model of transmission of ESBL-PE between patients through contacts with health-care  
6  
7  
8 479 workers (HCWs) and impact of infection control measures in the transmission process. Solid  
9  
10 480 lines represent the transitions between population groups and dashed lines represent the  
11  
12 481 transmission between patients and HCWs.

13  
14  
15 482**A.** Impact of universal (horizontal) control measures: 1) hand hygiene (reduces the transmission  
16  
17 483 among patients and HCWs); 2) antibiotic restriction (reduces the risk of transmission from  
18  
19 484 colonized patients receiving antibiotics to HCWs or from contaminated HCWs to uncolonized  
20  
21 485 patients receiving antibiotics).  
22  
23  
24

25 486  
26  
27 487**B.** Impact of targeted (vertical) control measures: screening of patients on ICU admission and  
28  
29 488 identification of patients who had positive screening results (patients surrounded by a shaded  
30  
31 489 box). Implementation of: 1) contact precautions (hand hygiene reduces the transmission from  
32  
33 490 identified ESBL-PE carriers to HCWs); 2) cohorting of identified ESBL-PE carriers and  
34  
35 491 attribution of a dedicated HCW (prevents the transmission from cohorted patients to other HCWs  
36  
37 492 and patients). Note that we included two categories of colonized patients: 1) who had false  
38  
39 493 negative admission screening results; 2) who had positive admission screening results (patients  
40  
41 494 surrounded by a shaded box).  
42  
43  
44

45  
46 495  
47  
48 496 **Figure 2.** Patient outcomes after one year under the different control strategies tested. (A) New  
49  
50 497 acquisitions (transmissions) of ESBL-PE per 100 admissions, (B) Total number of ESBL-PE  
51  
52 498 infections per 100 admissions in patients who: 1) acquired colonization in the ICU, and 2) those  
53  
54 499 who were already colonized at ICU admission.  
55  
56  
57  
58  
59  
60

1  
2  
3 500 Strategies are: (1) Base case (reference strategy with no control intervention and hand hygiene  
4  
5 501 compliance of 55%/60% before/after patient contact); (2) Hand hygiene improvement to  
6  
7 502 80%/80%; (3) Hand hygiene improvement to 55%/80%; (4) Antibiotic reduction; (5) Screening  
8  
9 503 of all admissions and contact precautions for identified carriers; (6) Screening of all admissions  
10  
11 504 and cohorting of identified carriers; (7) Hand hygiene improvement to 80%/80% and antibiotic  
12  
13 505 reduction; (8) Hand hygiene improvement to 55%/80% and antibiotic reduction; (9) Screening of  
14  
15 506 all admissions, contact precautions with identified carriers and antibiotic reduction; (10)  
16  
17 507 Screening of all admissions, cohorting of identified carriers and antibiotic reduction.  
18  
19  
20  
21  
22  
23

24 508  
25 **Figure 3.** Cost-effectiveness plane showing the incremental health benefits (infections avoided)  
26  
27 509 and costs relative to the least expensive strategy (Strategy 2). Strategies 1, 3, 4, 5, 8, 9 are  
28  
29 510 dominated as they have both a worse outcome and a higher cost. The efficiency frontier (grey  
30  
31 511 line), joins Strategy 2 with more expensive and more efficient strategies (7 and 10). Strategy 6 is  
32  
33 512 extended to this frontier and excluded by the principle of extended dominance. The slope of the  
34  
35 513 efficiency frontier represents the incremental cost-effectiveness.  
36  
37  
38

39 514 Strategies are: (1) Base case (reference strategy with no control intervention and hand hygiene  
40  
41 515 compliance of 55%/60% before/after patient contact); (2) Hand hygiene improvement to  
42  
43 516 80%/80%; (3) Hand hygiene improvement to 55%/80%; (4) Antibiotic reduction; (5) Screening  
44  
45 517 of all admissions and contact precautions with identified carriers; (6) Screening of all admissions  
46  
47 518 and cohorting of identified carriers; (7) Hand hygiene improvement to 80%/80% and antibiotic  
48  
49 519 reduction; (8) Hand hygiene improvement to 55%/80% and antibiotic reduction; (9) Screening of  
50  
51 520 all admissions, contact precautions with identified carriers and antibiotic reduction; (10)  
52  
53 521 Screening of all admissions, cohorting of identified carriers and antibiotic reduction.  
54  
55  
56  
57  
58  
59  
60

524 **TABLES**525 **Table 1. Cost parameters, their sources and ranges for sensitivity analyses.**

526 Costs of control strategies were based on material and personnel. For example, the cost of the HH  
 527 improvement strategy included the cost of HH (hand-rub and HCWs' time) and the cost of an  
 528 infection control nurse working on the programme, i.e. HH education, observation and feedback.

529

|                                                                                              | <u>Resource</u>                                 | <u>Cost (€<sup>a</sup>)</u> |           | <u>Source</u>      | <u>Distribution</u> |
|----------------------------------------------------------------------------------------------|-------------------------------------------------|-----------------------------|-----------|--------------------|---------------------|
|                                                                                              |                                                 | <u>mean</u>                 | <u>SD</u> |                    |                     |
|                                                                                              | ICU bed-day                                     | 1,583                       | 226       | AP-HP <sup>b</sup> | Gamma               |
| <u>Universal strategies</u>                                                                  |                                                 |                             |           |                    |                     |
| Hand hygiene                                                                                 | Alcohol-based hand rub                          | 0.011                       | 0.0055    | 34,35              | Gamma               |
|                                                                                              | HCW's time per hand hygiene                     | 0.143                       | 0.0714    |                    | Gamma               |
|                                                                                              | Infection control nurse at half-time/month      | 2,048 <sup>c</sup>          | 164       | AP-HP <sup>b</sup> | Gamma               |
| Antibiotic stewardship                                                                       | Infectious disease physician at half-time/month | 5,500 <sup>c</sup>          | 273       | AP-HP <sup>b</sup> | Gamma               |
| <u>Targeted strategies</u>                                                                   |                                                 |                             |           |                    |                     |
| Screening                                                                                    | Screening test + laboratory costs               | 40                          | 20        | 35-37              | Gamma               |
| Contact precautions<br>(= hand hygiene at<br>80%/80% with<br>identified ESBL-PE<br>patients) | Alcohol-based hand rub                          | 0.011                       | 0.0055    | 34,35              | Gamma               |
|                                                                                              | HCW's time per hand hygiene                     | 0.143                       | 0.0714    |                    | Gamma               |

|    |                      |                                |                    |        |                    |       |
|----|----------------------|--------------------------------|--------------------|--------|--------------------|-------|
| 1  |                      |                                |                    |        |                    |       |
| 2  |                      |                                |                    |        |                    |       |
| 3  | Cohorting            | Additional full-time HCW/month | 3,598 <sup>c</sup> | 642    | AP-HP <sup>b</sup> | Gamma |
| 4  | (additional HCW +    |                                |                    |        |                    |       |
| 5  | contact precautions) |                                |                    |        |                    |       |
| 6  |                      |                                |                    |        |                    |       |
| 7  |                      |                                |                    |        |                    |       |
| 8  |                      |                                |                    |        |                    |       |
| 9  |                      |                                |                    |        |                    |       |
| 10 |                      | Alcohol-based hand rub         | 0.011              | 0.0055 | 34,35              | Gamma |
| 11 |                      |                                |                    |        |                    |       |
| 12 |                      |                                |                    |        |                    |       |
| 13 |                      |                                |                    |        |                    |       |
| 14 |                      |                                |                    |        |                    |       |
| 15 |                      | HCW's time per hand hygiene    | 0.143              | 0.0714 |                    | Gamma |
| 16 |                      |                                |                    |        |                    |       |
| 17 |                      |                                |                    |        |                    |       |

17 530 <sup>a</sup> 1€ = US \$0.94

18  
19 531 <sup>b</sup> AP-HP: The Assistance publique – Hôpitaux de Paris

20  
21 532 <sup>c</sup> Cost of staff from a hospital perspective (salary + employer contributions)

22  
23 533

24  
25 534

26  
27 535

28  
29  
30  
31  
32  
33  
34  
35  
36  
37  
38  
39  
40  
41  
42  
43  
44  
45  
46  
47  
48  
49  
50  
51  
52  
53  
54  
55  
56  
57  
58  
59  
60

536 **Table 2.** Results of cost-effectiveness analysis.

| Strategy                                  | Number of ICU admissions | Total cost/100 admissions (€) | Cost of infections/100 admissions (€) | Cost of intervention/100 admissions (€) | Infections due to ESBL-PE/100 admissions | Incremental cost/100 admissions (€) | Incremental effect (ΔE) (infections avoided/100 admissions) | ICER (ΔC/ΔE) (€ / infection avoided) |
|-------------------------------------------|--------------------------|-------------------------------|---------------------------------------|-----------------------------------------|------------------------------------------|-------------------------------------|-------------------------------------------------------------|--------------------------------------|
| 2: HH 80%/80%                             | 573                      | 80 556                        | 54 916                                | 25 639                                  | 2.9                                      | -                                   | -                                                           | -                                    |
| 7: HH 80%/80% + ATB reduction             | 581                      | 88 498                        | 51 840                                | 36 657                                  | 2.7                                      | 7 941 <sup>a</sup>                  | 0.1618 <sup>a</sup>                                         | 49 025 <sup>a</sup>                  |
| 10: Screening + cohorting + ATB reduction | 584                      | 94 313                        | 50 058                                | 44 255                                  | 2.6                                      | 5 815 <sup>b</sup>                  | 0.0937 <sup>b</sup>                                         | 62 005 <sup>b</sup>                  |
| 3: HH 55%/80%                             | 548                      | 84 751                        | 66 773                                | 17 978                                  | 3.5                                      |                                     |                                                             | Dominated <sup>c</sup>               |
| 6: Screening + cohorting                  | 575                      | 86 713                        | 53 278                                | 33 435                                  | 2.8                                      |                                     |                                                             | Dominated <sup>d</sup>               |
| 8: HH 55%/80% + ATB reduction             | 565                      | 88 621                        | 59 445                                | 29 176                                  | 3.1                                      |                                     |                                                             | Dominated <sup>c</sup>               |

1  
2  
3  
4  
5  
6  
7  
8  
9  
10  
11  
12  
13  
14  
15  
16  
17  
18  
19  
20  
21  
22  
23  
24  
25  
26  
27  
28  
29  
30  
31  
32  
33  
34  
35  
36  
37  
38  
39  
40  
41  
42  
43  
44  
45  
46  
47  
48  
49

|                                    |     |         |        |        |     |  |                        |
|------------------------------------|-----|---------|--------|--------|-----|--|------------------------|
| 9: Screening + contact precautions |     |         |        |        |     |  |                        |
| + ATB reduction                    | 546 | 94 309  | 67 560 | 26 749 | 3.6 |  | Dominated <sup>c</sup> |
| 5: Screening + contact precautions | 519 | 96 716  | 81 582 | 15 134 | 4.3 |  | Dominated <sup>c</sup> |
| 4: ATB reduction                   | 528 | 100 128 | 77 641 | 22 486 | 4.1 |  | Dominated <sup>c</sup> |
| 1: <b>Base case</b>                | 498 | 105 344 | 94 792 | 10 552 | 5.0 |  | Dominated <sup>c</sup> |

537 <sup>a</sup> Relative to strategy 2

538 <sup>b</sup> Relative to strategy 7

539 <sup>c</sup> Dominated: A strategy is dominated when it has higher cost and lower health benefit than another strategy.

540 <sup>d</sup> Dominated by extended dominance: Strategy is dominated by extended dominance if the linear combination of other strategies produces greater benefit at lower cost.

1  
2  
3  
4  
5  
6  
7  
8  
9  
10  
11  
12  
13  
14  
15  
16  
17  
18  
19  
20  
21  
22  
23  
24  
25  
26  
27  
28  
29  
30  
31  
32  
33  
34  
35  
36  
37  
38  
39  
40  
41  
42  
43  
44  
45  
46  
47  
48  
49  
50  
51  
52  
53  
54  
55  
56  
57  
58  
59  
60

For peer review only

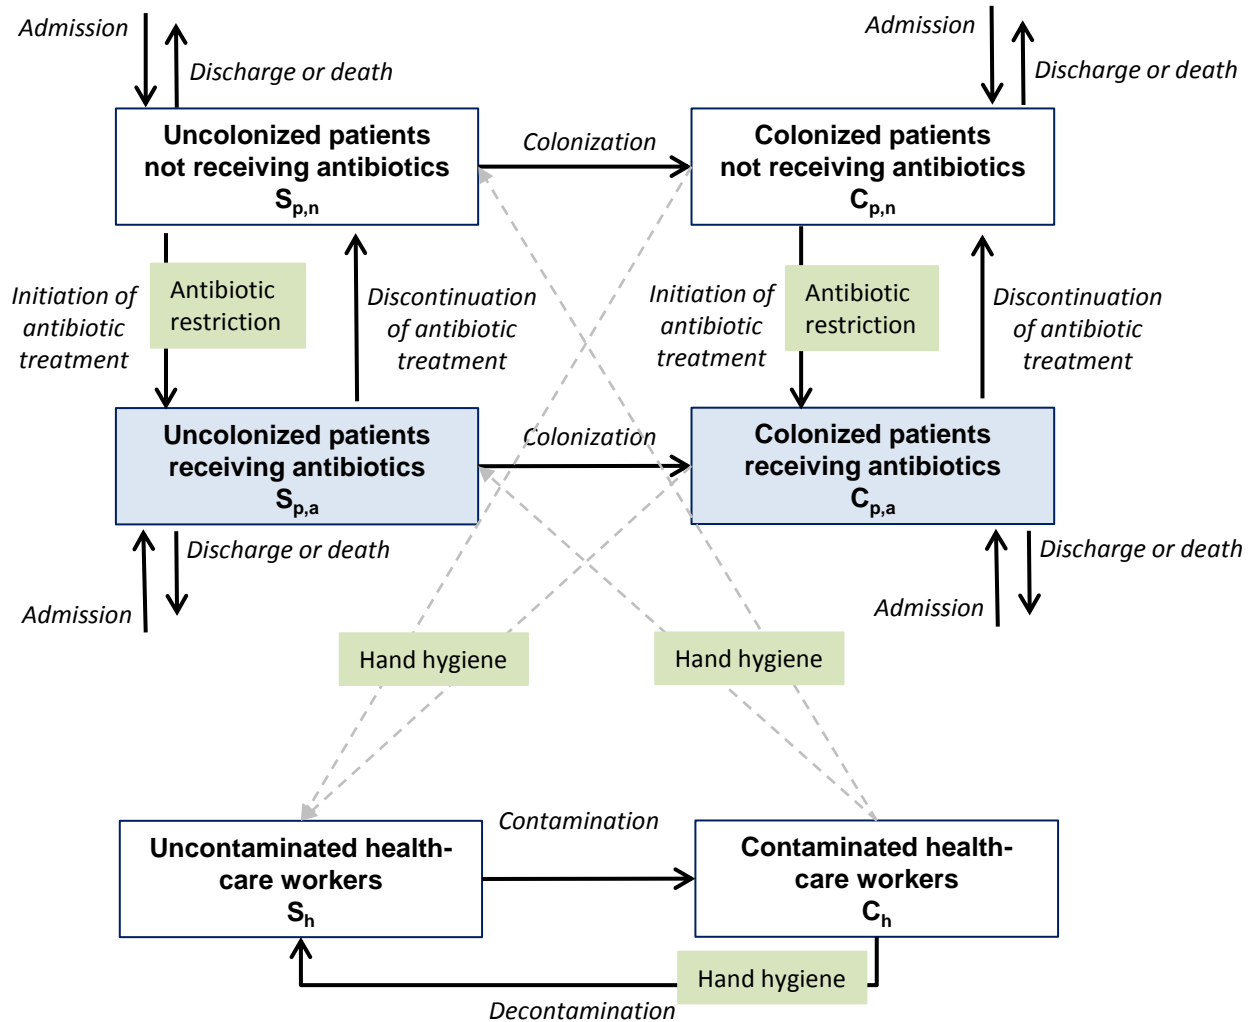



### BMJ Open

1  
2  
3  
4  
5  
6  
7  
8  
9  
10  
11  
12  
13  
14  
15  
16  
17  
18  
19  
20  
21  
22  
23  
24  
25  
26  
27  
28  
29  
30  
31  
32  
33  
34  
35  
36  
37  
38  
39  
40  
41  
42  
43

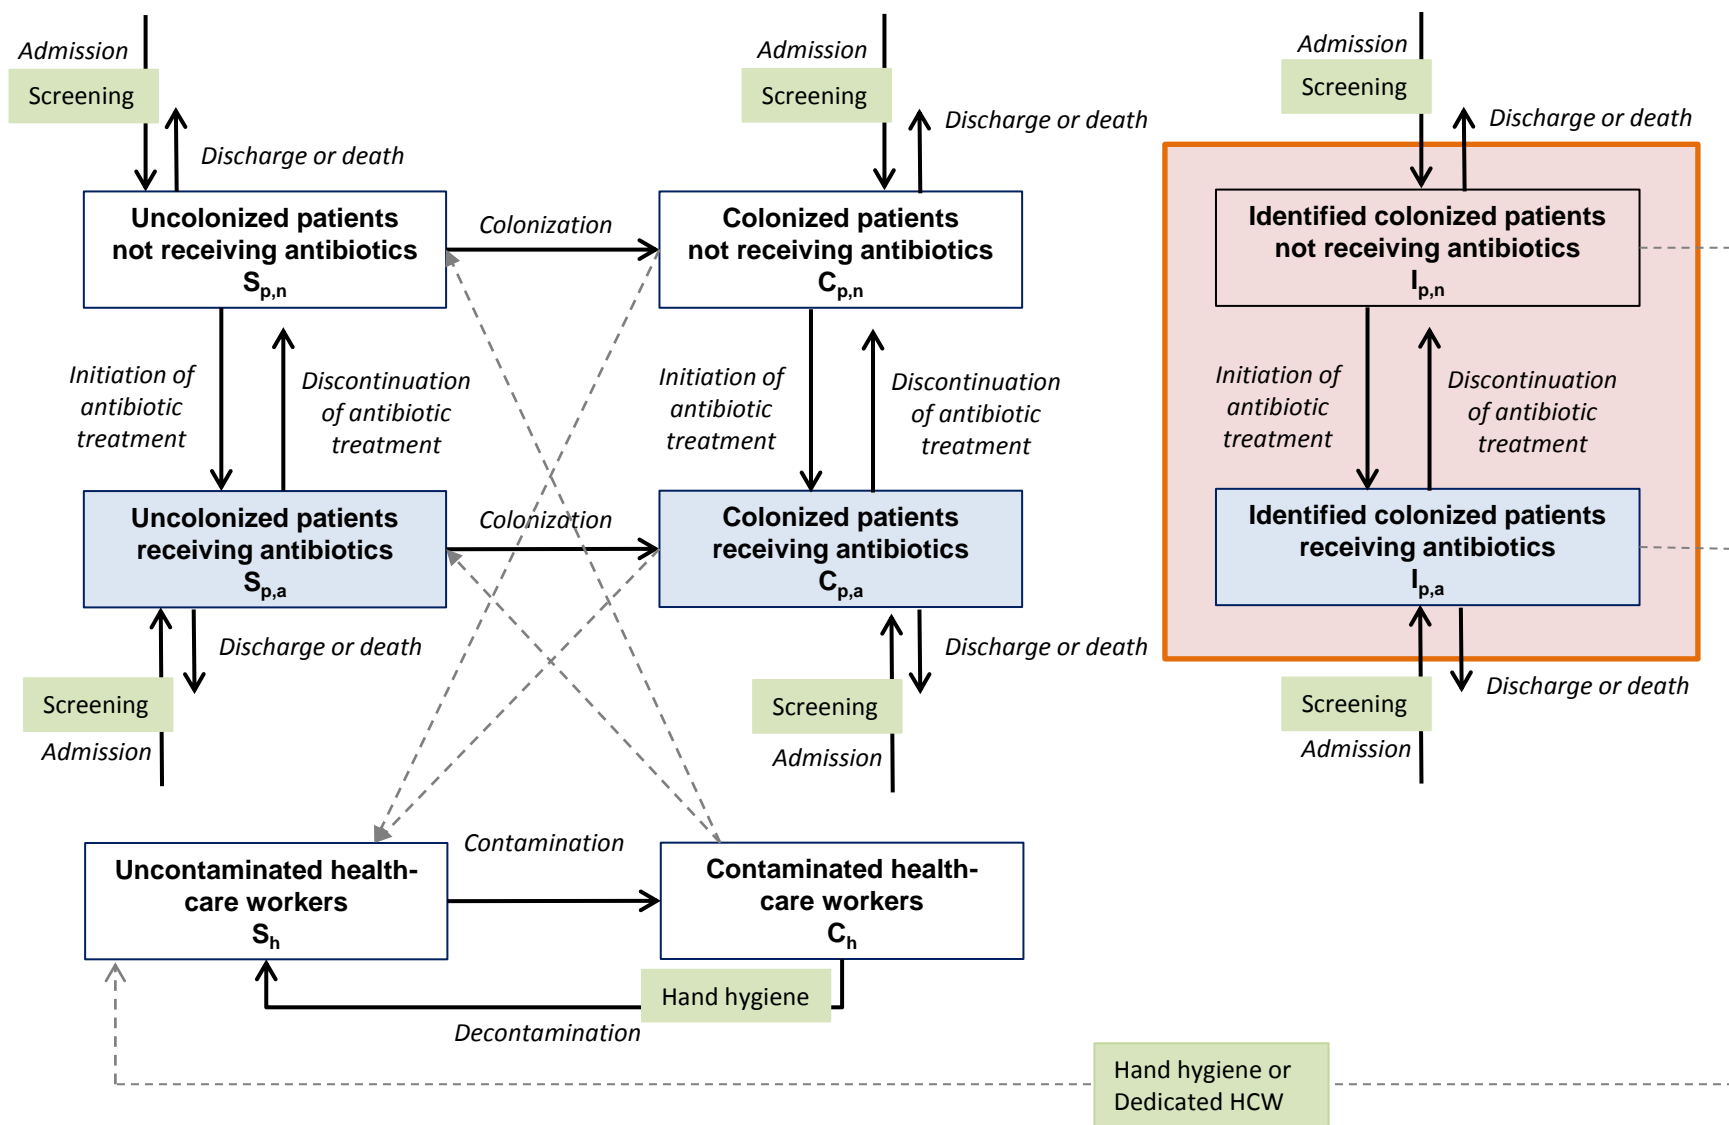

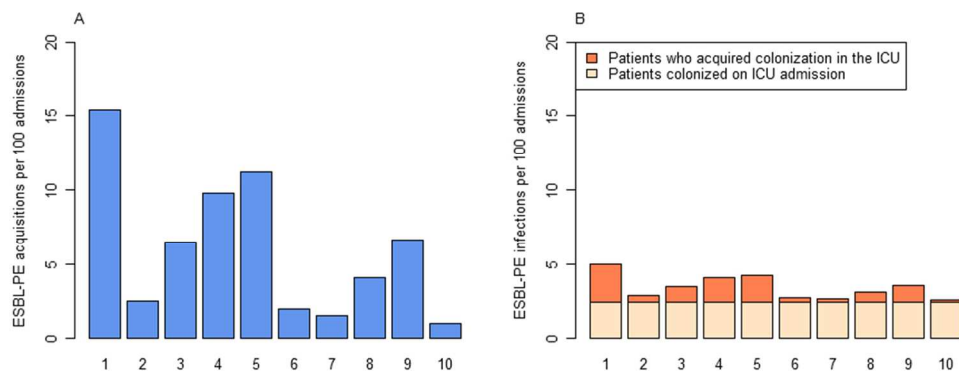

Figure 2. Patient outcomes after one year under the different control strategies tested. (A) New acquisitions (transmissions) of ESBL-PE per 100 admissions, (B) Total number of ESBL-PE infections per 100 admissions in patients who: 1) acquired colonization in the ICU, and 2) those who were already colonized at ICU admission.

Strategies are: (1) Base case (reference strategy with no control intervention and hand hygiene compliance of 55%/60% before/after patient contact); (2) Hand hygiene improvement to 80%/80%; (3) Hand hygiene improvement to 55%/80%; (4) Antibiotic reduction; (5) Screening of all admissions and contact precautions for identified carriers; (6) Screening of all admissions and cohorting of identified carriers; (7) Hand hygiene improvement to 80%/80% and antibiotic reduction; (8) Hand hygiene improvement to 55%/80% and antibiotic reduction; (9) Screening of all admissions, contact precautions with identified carriers and antibiotic reduction; (10) Screening of all admissions, cohorting of identified carriers and antibiotic reduction.

317x141mm (72 x 72 DPI)

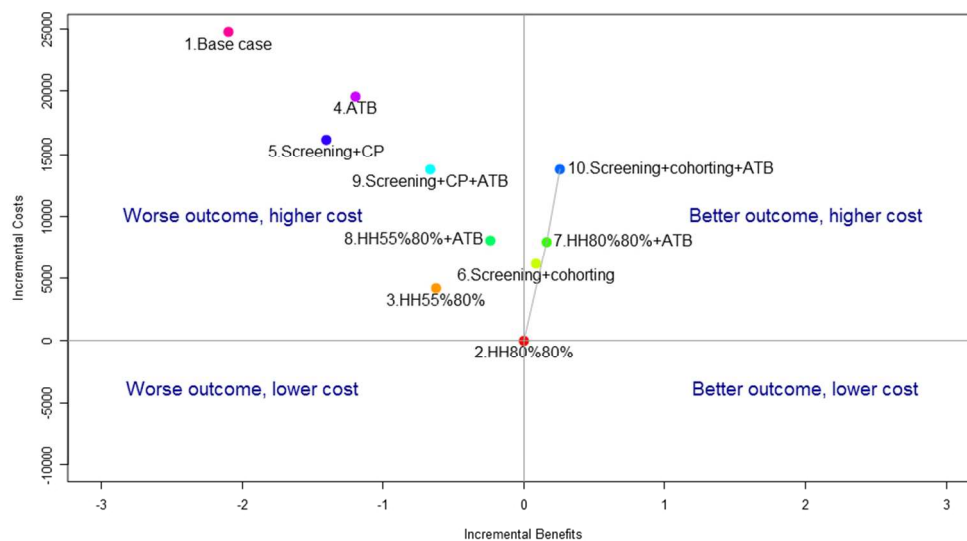

Figure 3. Cost-effectiveness plane showing the incremental health benefits (infections avoided) and costs relative to the least expensive strategy (Strategy 2). Strategies 1, 3, 4, 5, 8, 9 are dominated as they have both a worse outcome and a higher cost. The efficiency frontier (grey line), joins Strategy 2 with more expensive and more efficient strategies (7 and 10). Strategy 6 is extended to this frontier and excluded by the principle of extended dominance. The slope of the efficiency frontier represents the incremental cost-effectiveness.

Strategies are: (1) Base case (reference strategy with no control intervention and hand hygiene compliance of 55%/60% before/after patient contact); (2) Hand hygiene improvement to 80%/80%; (3) Hand hygiene improvement to 55%/80%; (4) Antibiotic reduction; (5) Screening of all admissions and contact precautions with identified carriers; (6) Screening of all admissions and cohorting of identified carriers; (7) Hand hygiene improvement to 80%/80% and antibiotic reduction; (8) Hand hygiene improvement to 55%/80% and antibiotic reduction; (9) Screening of all admissions, contact precautions with identified carriers and antibiotic reduction; (10) Screening of all admissions, cohorting of identified carriers and antibiotic reduction.

352x211mm (72 x 72 DPI)

## Supplementary material

### Supplementary Text S1

| <b>Defining the objectives, scope and policy context of a model.</b> |                                                                                                                                                                                                      |
|----------------------------------------------------------------------|------------------------------------------------------------------------------------------------------------------------------------------------------------------------------------------------------|
| Decision objective                                                   | To evaluate ESBL-PE control strategies                                                                                                                                                               |
| Policy context                                                       | This analysis was used to support decision makers in choosing the best strategy for controlling ESBL-PE                                                                                              |
| Funding source                                                       | PREPS Program*, Inserm**                                                                                                                                                                             |
| Disease                                                              | ESBL-PE infections                                                                                                                                                                                   |
| Perspective                                                          | Hospital perspective                                                                                                                                                                                 |
| Target population                                                    | ICU patients                                                                                                                                                                                         |
| Health benefits                                                      | Reduction in ESBL-PE infections                                                                                                                                                                      |
| Strategies                                                           | Universal strategies (hand hygiene improvement or antibiotic reduction)<br>Targeted strategies (screening of patients on ICU admission and contact precaution in contact with carriers or cohorting) |
| Resources/costs                                                      | Staff time working on the program, materials                                                                                                                                                         |
| Time horizon                                                         | 1 year                                                                                                                                                                                               |
| *PREPS - French government's program on Care System Performance      |                                                                                                                                                                                                      |
| **Inserm- National Institute for Health and Medical Research         |                                                                                                                                                                                                      |

### Transmission model

We have used an extended version of a previously developed compartmental, dynamic, stochastic model to simulate the transmission of ESBL-PE in a hypothetical ICU with 10 single-bed rooms among patients through contacts with healthcare workers (HCWs)<sup>1</sup>.

For each simulation, we introduced a single unidentified ESBL-PE carrier receiving antibiotics within the ward and simulated the ESBL-PE dynamics for one year. In this version of the model, following the first admitted colonized patient,  $\phi$  was the fraction of admitted patients assumed to be colonized with ESBL-PE. Patients are discharged at rate  $\gamma$  or die at rate  $\nu$  but bed occupancy is assumed to be 100% (the population of patients in the ward is constant).

Patients may or may not receive antibiotics at admission; antibiotics are initiated during the patient's stay at rate  $\tau$  per day and antibiotics are discontinued at rate  $\theta$  per day.

In the model, all patients were classified as 1) uncolonized receiving antibiotics ( $S_{p,a}$ ) or not ( $S_{p,n}$ ), 2) unidentified ESBL-PE carriers receiving antibiotics ( $C_{p,a}$ ) or not ( $C_{p,n}$ ) (**Figure 1A**).

Antibiotics in the model acted in two ways: 1) increased the risk of becoming colonized for uncolonized patients receiving antibiotics; and 2) increased the risk of transmission from colonized patients receiving antibiotics.

Initially uncontaminated HCWs ( $S_h$ ) can become transiently contaminated (and go to the compartment  $C_h$ ) after contact with a colonized patient ( $C_{p,n}$  or  $C_{p,a}$ ).

### Transmission parameters

Exposure to antibiotics has been associated with increased probability of colonization for uncolonized patients<sup>2,3</sup> and of transmission from colonized patients to HCWs<sup>4</sup>. Thus, we hypothesized that: 1) the colonization probability after contact with a contaminated HCW was higher in patients on antibiotics than in untreated patients ( $b_{p,a} > b_{p,n}$ ), 2) the probability of contamination of an HCW through contact with a colonized patient was higher if the patient was treated with antibiotics ( $b_{h,a} > b_{h,n}$ ).

The model parameters and their values are presented in **Supplementary Table 1**.

### Model calibration

The model was simulated stochastically. We calibrated the colonization and contamination parameters using Monte Carlo methods in order to reproduce the observed 12.9% acquisition rate in an ICU after a 6-month period<sup>5</sup>.

### Mathematical model under targeted infection control measures

The model was modified to account for the effect of targeted control measures. To detect ESBL-PE carriers, we simulated the screening of patients at ICU admission. We assumed that the screening method had 95% sensitivity and 100% specificity. Thus in the model, all patients were classified as 1) uncolonized receiving antibiotics ( $S_{p,a}$ ) or not ( $S_{p,n}$ ), 2) unidentified ESBL-PE carriers receiving antibiotics ( $C_{p,a}$ ) or not ( $C_{p,n}$ ), and 3) identified ESBL-PE carriers receiving antibiotics ( $I_{p,a}$ ) or not ( $I_{p,n}$ ) (**Figure 1B**).

The transmission parameter  $\beta$  depends on the rate of HCW visits followed by contacts with the patient ( $a$ ), the probability of ESBL-PE bacteria transmission per infectious contact ( $b_{..}$ ), and the compliance with hand hygiene (HH) ( $p_p$  and  $p_h$ ).

The risk of transmission from an unidentified ESBL-PE carrier to n HCW might differ from that of an identified ESBL-PE carrier, because of the implementation of targeted control measures.

Firstly, we modelled the implementation of contact precautions (improvement of HH) in contacts with identified ESBL-PE carriers. HH for other patients was maintained at baseline level.

The transmission parameters were defined as follows:

$$\begin{aligned} \beta_{p,a} &= a \cdot b_{p,a} \cdot (1 - p_p) \\ \beta_{p,n} &= a \cdot b_{p,n} \cdot (1 - p_p) \end{aligned} \quad \left. \vphantom{\begin{aligned} \beta_{p,a} \\ \beta_{p,n} \end{aligned}} \right\} \text{Transmission from contaminated HCWs to uncolonized patients (receiving antibiotics or not)}$$

$$\begin{aligned} \beta_{h,a} &= a \cdot b_{h,a} \cdot (1 - p_h) \\ \beta_{h,n} &= a \cdot b_{h,n} \cdot (1 - p_h) \end{aligned} \quad \left. \vphantom{\begin{aligned} \beta_{h,a} \\ \beta_{h,n} \end{aligned}} \right\} \text{Transmission from non-identified, colonized patients (receiving antibiotics or not) to HCWs}$$

$$\begin{aligned} \beta_{h,a,I} &= a \cdot b_{h,a,I} \cdot (1 - p_{h,Is}) \\ \beta_{h,n,I} &= a \cdot b_{h,n,I} \cdot (1 - p_{h,Is}) \end{aligned} \quad \left. \vphantom{\begin{aligned} \beta_{h,a,I} \\ \beta_{h,n,I} \end{aligned}} \right\} \text{Transmission from identified, colonized patients (receiving antibiotics or not) to HCWs}$$

Secondly, we modelled the introduction of a dedicated HCW to interact only with identified, colonized patients. The transmission parameters were defined as follows:

|                                                 |   |                                                                                                                        |
|-------------------------------------------------|---|------------------------------------------------------------------------------------------------------------------------|
| $\beta_{p,a} = a \cdot b_{p,a} \cdot (1 - p_p)$ | } | Transmission from contaminated HCWs to uncolonized patients (receiving antibiotics or not)                             |
| $\beta_{p,n} = a \cdot b_{p,n} \cdot (1 - p_p)$ |   |                                                                                                                        |
| $\beta_{h,a} = a \cdot b_{h,a} \cdot (1 - p_h)$ | } | Transmission from non-identified, colonized patients (receiving antibiotics or not) to HCWs                            |
| $\beta_{h,n} = a \cdot b_{h,n} \cdot (1 - p_h)$ |   |                                                                                                                        |
| $\beta_{h,a,l} = 0$                             | } | Transmission from identified, colonized patients (receiving antibiotics or not) to HCWs (other than the dedicated HCW) |
| $\beta_{h,n,l} = 0$                             |   |                                                                                                                        |



1  
2  
3 Once colonized, patients do not clear ESBL-PE colonization before discharge. HCWs are  
4  
5 transiently contaminated and they become decontaminated either by performing HH or after a  
6  
7 mean waiting time of one hour.  
8  
9

### 10 **Model parameters**

11  
12 The model parameters and their values are presented in **Supplementary Table 1**. Parameter  
13  
14 values were derived from multicentre studies if available, and by default based on best evidence  
15  
16 from the literature or expert opinion.  
17  
18

19  
20 We modelled an ICU with 10 single-rooms with continuous presence of 6 HCWs<sup>6</sup>. We assumed  
21  
22 100% bed occupancy. Consequently, a shorter length of stay (LOS) implies a higher turnover and  
23  
24 possible admission of colonized patients<sup>7</sup>. As reported recently, the ICU LOS of ESBL-PE  
25  
26 carriers is longer (13 days) than uncolonized patients (5 days)<sup>8</sup>. The extended LOS in ESBL-PE  
27  
28 carriers increases the colonization pressure in the ICU, consequently increasing the risk of cross-  
29  
30 transmission.  
31  
32

33  
34 When targeted control strategies were used, colonization was detected using a screening method  
35  
36 assuming that the time between collection of specimens and reporting results to the ward was less  
37  
38 than 1 day. We assumed that the sensitivity of the screening method was 95%<sup>9</sup>. Screening results  
39  
40 had 100% specificity.  
41  
42  
43  
44  
45  
46  
47

### 48 **Costs of control strategies**

49  
50 We estimated the costs of control strategies over the one-year simulation period. See **Table 1** for  
51  
52 details on cost parameters. The cost of the base case strategy (reference strategy) was considered  
53  
54  
55  
56  
57  
58  
59  
60

1  
2  
3 to be the cost of HH at baseline level, namely cost of the alcohol-based hand rub and costs  
4 associated with the time HCWs required for hand disinfection.  
5  
6  
7  
8  
9

10 As reported recently, the highest cost of an HH program arose from the time people spent  
11 working on the program<sup>10</sup>. We therefore assumed that the cost of an HH improvement strategy  
12 included the cost of HH (hand-rub and HCWs' time) and the cost of an infection control nurse  
13 working on the program, i.e. HH education, observation and feedback<sup>10,11</sup>. We assumed that  
14 improving hand HH compliance to 55/80% and to 80/80% required respectively a quarter and a  
15 half of the working time of an infection control nurse. In accordance with staffing practices  
16 common in the European Union, we assumed that one staff position requires the recruitment of  
17 three nurses<sup>12</sup>.  
18  
19  
20  
21  
22  
23  
24  
25  
26  
27  
28  
29  
30

31 Antibiotic stewardship programs (ASPs) have proven efficient in reducing antibiotic use and  
32 antibiotic duration in hospitals<sup>13,14</sup>. Interventions included in ASPs require additional resources  
33 associated with higher costs<sup>15</sup>. One of the resources needed and associated with the highest costs  
34 is the staff time<sup>16</sup>. We calculated the cost of an action to reduce antibiotic use as the cost of a  
35 half-time infectious disease physician working on the ASP. The cost of antibiotics is considered  
36 to be marginal and was not considered in our study<sup>14</sup>.  
37  
38  
39  
40  
41  
42  
43  
44  
45  
46  
47

48 The cost of screening was first based on the cost of testing materials and on the cost of laboratory  
49 technician time. For the strategy in which screening at admission was combined with contact  
50 precautions for identified ESBL-PE carriers, we also included the cost of contact precautions  
51 such as the cost of improved HH (i.e. the cost of the alcohol-based hand rub), and the costs  
52 associated with the time HCWs required for hand disinfection. Here we did not consider the cost  
53  
54  
55  
56  
57  
58  
59  
60

1  
2  
3 of an infection control nurse. We hypothesized that knowing that the patient is an ESBL-PE  
4 carrier, HCWs would adhere more easily to HH.  
5  
6

7  
8 For the strategy in which screening on admission was combined with cohorting of identified  
9 ESBL-PE patients, the cost of cohorting was the cost of contact precautions and the cost of  
10 additional HCWs caring for cohorted patients. For screening interventions, the cost of HH in non-  
11 carriers and unidentified carriers was considered to be identical to the costs of the baseline level.  
12  
13  
14  
15

### 16 17 18 19 20 **Cost of hospital-acquired infections**

21  
22 The mean cost of an ICU bed-day was estimated at €1,583 (based on the average amount paid in  
23 2015 for ICUs in Paris public hospitals (AP-HP). This amount is based on French Diagnosis-  
24 Related Groups and complementary revenues specific to ICU units and divided by the mean  
25 length of stay in ICUs in 2015<sup>17</sup>. Based on published reports, the cost per day of a patient with  
26 ESBL-PE infection was 50% higher than the cost of an uninfected patient<sup>18,19</sup>. The cost of an  
27 ESBL-PE infection was estimated using the ESBL-PE-attributable LOS and the cost of a hospital  
28 bed-day for infected patients<sup>20,21</sup>.  
29  
30  
31  
32  
33  
34  
35  
36  
37  
38  
39  
40  
41

### 42 **Model simulations and outcomes**

43  
44 Simulations of the model were performed using Gillespie's method and programmed in C++  
45 language. The outcomes were calculated after a period of 1 year and averaged over the 1,000  
46 Monte Carlo simulations. Cost-effectiveness analysis and graphics were performed in R<sup>22</sup>.  
47  
48  
49  
50  
51  
52  
53  
54  
55  
56  
57  
58  
59  
60

## TABLES

**Supplementary Table 1.** Base case values and ranges for probabilistic sensitivity analysis of input parameters used in the compartmental model of ESBL-PE transmission.

**Comment.** As can be seen, for some parameters the ranges for a sensitivity analysis are omitted (e.g.  $d_{ATB,S}$ ). This is because these parameters are specific to a strategy (e.g. Atb reduction) and must be fixed in sensitivity analysis to allow the comparison of outcomes with other strategies.

| Parameter | Description                                                                           | Value  | Source                                             | Sensitivity analysis                         |                             |
|-----------|---------------------------------------------------------------------------------------|--------|----------------------------------------------------|----------------------------------------------|-----------------------------|
|           |                                                                                       |        |                                                    | Range                                        | Distribution                |
| $N_p$     | Number of beds                                                                        | 10     | <sup>23</sup>                                      |                                              |                             |
| $N_h$     | Number of HCWs                                                                        | 6      | <sup>24</sup>                                      |                                              |                             |
| $c_p$     | Number of HCW visits associated with at least one aseptic contact per patient per day | 81     | <sup>25-27</sup>                                   | 13.8 <sup>28</sup> - 160 <sup>25,29,30</sup> | triangular (peak at 81)     |
| $a$       | Number of HCW visits associated with at least one aseptic contact per HCW per day     | 13.5   | $c_p/N_h$                                          |                                              |                             |
| $b_{p,n}$ | Colonization probability for patients not receiving antibiotics                       | 0.0127 | Calibrated, consistent with data from <sup>5</sup> | 0-0.1                                        | triangular (peak at 0.0127) |
| $b_{p,a}$ | Colonization probability for patients receiving antibiotics                           | 0.0530 |                                                    | $b_{p,n}-0.5$                                | uniform                     |

|            |                                                                                                                         |        |                                                    |                |                             |
|------------|-------------------------------------------------------------------------------------------------------------------------|--------|----------------------------------------------------|----------------|-----------------------------|
| $b_{h,n}$  | Probability of contamination of an HCW with ESBL-PE during a contact with a colonized patient not receiving antibiotics | 0.0379 | Calibrated, consistent with data from <sup>5</sup> | 0-0.6          | triangular (peak at 0.0379) |
| $b_{h,a}$  | Probability of contamination of an HCW during a contact with a colonized patient receiving antibiotics                  | 0.3198 | Calibrated, consistent with data from <sup>5</sup> | $b_{h,n}-0.8$  | uniform                     |
| $d_s$      | Mean length of stay of uncolonized patients (days)                                                                      | 5      | <sup>8</sup>                                       | $3-9^8$        | triangular (peak at 5)      |
| $d_c$      | Mean length of stay of colonized patients (days)                                                                        | 13     | <sup>8</sup>                                       | $6-26^8$       | triangular (peak at 13)     |
| $d_{is}$   | Mean length of stay of isolated patients (days)                                                                         | 13     | <sup>8</sup>                                       | $6-26^8$       | triangular (peak at 13)     |
| $\gamma_s$ | Discharge rate of uncolonized patients (/day)                                                                           | 0.2    | $1/d_s$                                            |                |                             |
| $\gamma_c$ | Discharge rate of colonized patients (/day)                                                                             | 0.0154 | $1/d_c$                                            |                |                             |
| $\nu$      | Death rate of patients (/day)                                                                                           | 0.0027 | <sup>8</sup>                                       | 0.00135-0.0054 | triangular (peak at 0.0027) |

|             |                                                                                    |         |               |          |                           |
|-------------|------------------------------------------------------------------------------------|---------|---------------|----------|---------------------------|
| $\mu_0$     | Natural decontamination rate for HCW (i.e. not by hand hygiene) (/day)             | 24      | 28,31         | 12-48    | triangular (peak at 24)   |
| $\psi$      | Prevalence of antibiotic therapy among admitted patients                           | 0.56    | 32,33         | 0.2-0.9  | triangular (peak at 0.56) |
| $\tau$      | Antibiotic initiation rate (/day)                                                  | 0.1     | assumed       | 0.05-0.2 | triangular (peak at 0.1)  |
| $d_{ATB,S}$ | Antibiotic therapy duration for uncolonized patients (days)                        | 8       | 33            |          |                           |
| $d_{ATB,C}$ | Antibiotic therapy duration for colonized patients (days)                          | 18      | 33            |          |                           |
| $\theta_S$  | Antibiotic therapy discontinuation rate for uncolonized patients (/day)            | 0.125   | $1/d_{ATB_S}$ |          |                           |
| $\theta_C$  | Antibiotic therapy discontinuation rate for colonized patients (/day)              | 0.05556 | $1/d_{ATB_C}$ |          |                           |
| $p_p$       | Probability of hand hygiene before contact with patient (uncolonized or colonized) | 0.55    | 34            |          |                           |

|           |                                                                                                |       |               |            |                            |
|-----------|------------------------------------------------------------------------------------------------|-------|---------------|------------|----------------------------|
|           | unidentified)                                                                                  |       |               |            |                            |
| $p_h$     | Probability of hand hygiene after contact with patient (uncolonized or colonized unidentified) | 0.6   | <sup>34</sup> |            |                            |
| $p_{pls}$ | Probability of hand hygiene before contact with isolated patient                               | 0.8   | assumed       |            |                            |
| $p_{his}$ | Probability of hand hygiene after contact with isolated patient                                | 0.8   | assumed       |            |                            |
| $\phi$    | Prevalence of ESBL-PE carriage among admitted patients                                         | 0.15  | <sup>20</sup> | 0.07-0.3   | triangular (peak at 0.15)  |
| $p_i$     | Probability of infection in colonized patient                                                  | 0.164 | <sup>8</sup>  | 0.08- 0.32 | triangular (peak at 0.164) |
| $d_i$     | Mean length of stay of infected patients (days)                                                | 13    | <sup>8</sup>  | 6-29 [12]  | triangular (peak at 13)    |
| $s_b$     | Sensitivity of the screening method (%)                                                        | 95    | <sup>9</sup>  |            |                            |
| $s_p$     | Specificity of the screening method (%)                                                        | 100   | assumed       |            |                            |

## REFERENCES

- 1 Pelat C, Kardaś-Słoma L, Birgand G, *et al.* Hand Hygiene, Cohorting, or Antibiotic Restriction to Control Outbreaks of Multidrug-Resistant Enterobacteriaceae. *Infect Control Hosp Epidemiol* 2016; **37**: 272–80.
- 2 Nicolas-Chanoine M-H, Jarlier V, Robert J, *et al.* Patient's origin and lifestyle associated with CTX-M-producing *Escherichia coli*: a case-control-control study. *PLoS One* 2012; **7**: e30498.
- 3 Colodner R, Rock W, Chazan B, *et al.* Risk factors for the development of extended-spectrum beta-lactamase-producing bacteria in nonhospitalized patients. *Eur J Clin Microbiol Infect Dis Off Publ Eur Soc Clin Microbiol* 2004; **23**: 163–7.
- 4 D'Agata EMC, Webb G, Horn M. A mathematical model quantifying the impact of antibiotic exposure and other interventions on the endemic prevalence of vancomycin-resistant enterococci. *J Infect Dis* 2005; **192**: 2004–11.
- 5 Derde LPG, Cooper BS, Goossens H, *et al.* Interventions to reduce colonisation and transmission of antimicrobial-resistant bacteria in intensive care units: an interrupted time series study and cluster randomised trial. *Lancet Infect Dis* 2014; **14**: 31–9.
- 6 French Ministry, of Health website. Décret n°2002-466 du 5 avril 2002 relatif aux conditions techniques de fonctionnement auxquelles doivent satisfaire les établissements de santé pour pratiquer les activités de réanimation, de soins intensifs et de surveillance continue et modifiant le code de la santé publique (troisième partie : Décrets simples). 2002.
- 7 Cooper BS, Medley GF, Scott GM. Preliminary analysis of the transmission dynamics of nosocomial infections: stochastic and management effects. *J Hosp Infect* 1999; **43**: 131–47.
- 8 Barbier F, Pommier C, Essaïed W, *et al.* Colonization and infection with extended-spectrum  $\beta$ -lactamase-producing Enterobacteriaceae in ICU patients: what impact on outcomes and carbapenem exposure? *J Antimicrob Chemother* 2016; **71**: 1088–97.
- 9 Chavada R, Maley M. Evaluation of a Commercial Multiplex PCR for Rapid Detection of Multi Drug Resistant Gram Negative Infections. *Open Microbiol J* 2015; **9**: 125–35.
- 10 Page K, Barnett AG, Campbell M, *et al.* Costing the Australian National Hand Hygiene Initiative. *J Hosp Infect* 2014; **88**: 141–8.
- 11 World Health Organization. WHO Guidelines on Hand Hygiene in Health Care. 2009. [http://apps.who.int/iris/bitstream/10665/44102/1/9789241597906\\_eng.pdf](http://apps.who.int/iris/bitstream/10665/44102/1/9789241597906_eng.pdf) (accessed Sept 6, 2016).
- 12 Ferrer J, Boelle P-Y, Salomon J, *et al.* Management of nurse shortage and its impact on pathogen dissemination in the intensive care unit. *Epidemics* 2014; **9**: 62–9.
- 13 Davey P, Brown E, Charani E, *et al.* Interventions to improve antibiotic prescribing practices for hospital inpatients. *Cochrane Database Syst Rev* 2013; : CD003543.



- 1  
2  
3 14 Rimawi RH, Mazer MA, Siraj DS, Gooch M, Cook PP. Impact of regular collaboration between  
4 infectious diseases and critical care practitioners on antimicrobial utilization and patient outcome. *Crit*  
5 *Care Med* 2013; **41**: 2099–107.  
6  
7 15 Dik J-WH, Vemer P, Friedrich AW, *et al*. Financial evaluations of antibiotic stewardship programs-a  
8 systematic review. *Front Microbiol* 2015; **6**: 317.  
9  
10 16 Page K, Graves N, Halton K, Barnett AG. Humans, ‘things’ and space: costing hospital infection  
11 control interventions. *J Hosp Infect* 2013; **84**: 200–5.  
12  
13 17 Assistance publique – Hôpitaux de Paris (AP-HP). Base de données PMSI. 2015.  
14  
15 18 Vasudevan A, Memon BI, Mukhopadhyay A, Li J, Tambyah PA. The costs of nosocomial resistant  
16 gram negative intensive care unit infections among patients with the systemic inflammatory response  
17 syndrome- a propensity matched case control study. *Antimicrob Resist Infect Control* 2015; **4**: 3.  
18  
19 19 MacVane SH, Tuttle LO, Nicolau DP. Impact of extended-spectrum  $\beta$ -lactamase-producing organisms  
20 on clinical and economic outcomes in patients with urinary tract infection. *J Hosp Med* 2014; **9**: 232–8.  
21  
22 20 Razazi K, Derde LPG, Verachten M, Legrand P, Lesprit P, Brun-Buisson C. Clinical impact and risk  
23 factors for colonization with extended-spectrum  $\beta$ -lactamase-producing bacteria in the intensive care  
24 unit. *Intensive Care Med* 2012; **38**: 1769–78.  
25  
26 21 Viau R, Frank KM, Jacobs MR, *et al*. Intestinal Carriage of Carbapenemase-Producing Organisms:  
27 Current Status of Surveillance Methods. *Clin Microbiol Rev* 2016; **29**: 1–27.  
28  
29 22 R Core Team. R: The R Project for Statistical Computing. <https://www.r-project.org/> (accessed Sept  
30 15, 2016).  
31  
32 23 The French Intensive Care Society. SRLF. <http://www.srlf.org/en/the-french-intensive-care-society/>  
33 (accessed Sept 15, 2016).  
34  
35 24 French Ministry, of Health website. Décret n° 2002-466 du 5 avril 2002 relatif aux conditions  
36 techniques de fonctionnement auxquelles doivent satisfaire les établissements de santé pour pratiquer  
37 les activités de réanimation, de soins intensifs et de surveillance continue et modifiant le code de la  
38 santé publique (troisième partie : Décrets simples). 2002.  
39  
40 25 Steed C, Kelly JW, Blackhurst D, *et al*. Hospital hand hygiene opportunities: where and when  
41 (HOW2)? The HOW2 Benchmark Study. *Am J Infect Control* 2011; **39**: 19–26.  
42  
43 26 Beggs CB, Noakes CJ, Shepherd SJ, Kerr KG, Sleigh PA, Banfield K. The influence of nurse cohorting  
44 on hand hygiene effectiveness. *Am J Infect Control* 2006; **34**: 621–6.  
45  
46 27 Guyot, J.M. Etude sur l'évaluation des pratiques dans le cadre de la lutte contre les infections  
47 nosocomiales sur les « frictions hydro-alcooliques par spécialités médico-chirurgicales ». Lot n°2 :  
48 Enquête sur le nombre d'opportunités d'hygiène des mains par spécialité médico-chirurgicale: 2008.  
49  
50 28 Austin DJ, Bonten MJ, Weinstein RA, Slaughter S, Anderson RM. Vancomycin-resistant enterococci  
51 in intensive-care hospital settings: transmission dynamics, persistence, and the impact of infection  
52 control programs. *Proc Natl Acad Sci U S A* 1999; **96**: 6908–13.  
53  
54  
55  
56  
57  
58  
59  
60

- 1  
2  
3 29 McArdle FI, Lee RJ, Gibb AP, Walsh TS. How much time is needed for hand hygiene in intensive  
4 care? A prospective trained observer study of rates of contact between healthcare workers and intensive  
5 care patients. *J Hosp Infect* 2006; **62**: 304–10.  
6  
7  
8 30 Scheithauer S, Haefner H, Schwanz T, *et al.* Compliance with hand hygiene on surgical, medical, and  
9 neurologic intensive care units: direct observation versus calculated disinfectant usage. *Am J Infect*  
10 *Control* 2009; **37**: 835–41.  
11  
12 31 Sypsa V, Psychogiou M, Bouzala G-A, Hadjihannas L, Hatzakis A, Daikos GL. Transmission dynamics  
13 of carbapenemase-producing *Klebsiella pneumoniae* and anticipated impact of infection control  
14 strategies in a surgical unit. *PloS One* 2012; **7**: e41068.  
15  
16 32 REA-Raisin network. Surveillance des infections nosocomiales en réanimation adulte / 2012 / Maladies  
17 infectieuses / Rapports et synthèses / Publications et outils / Accueil.  
18 [http://invs.santepubliquefrance.fr/Publications-et-outils/Rapports-et-syntheses/Maladies-](http://invs.santepubliquefrance.fr/Publications-et-outils/Rapports-et-syntheses/Maladies-infectieuses/2012/Surveillance-des-infections-nosocomiales-en-reanimation-adulte)  
19 [infectieuses/2012/Surveillance-des-infections-nosocomiales-en-reanimation-adulte](http://invs.santepubliquefrance.fr/Publications-et-outils/Rapports-et-syntheses/Maladies-infectieuses/2012/Surveillance-des-infections-nosocomiales-en-reanimation-adulte) (accessed Sept 15,  
20 2016).  
21  
22 33 Robert J, Péan Y, Varon E, *et al.* Point prevalence survey of antibiotic use in French hospitals in 2009.  
23 *J Antimicrob Chemother* 2012; **67**: 1020–6.  
24  
25  
26 34 Venier AG, Zaro-Goni D, Pefau M, *et al.* Performance of hand hygiene in 214 healthcare facilities in  
27 South-Western France. *J Hosp Infect* 2009; **71**: 280–2.  
28  
29  
30  
31  
32  
33  
34  
35  
36  
37  
38  
39  
40  
41  
42  
43  
44  
45  
46  
47  
48  
49  
50  
51  
52  
53  
54  
55  
56  
57  
58  
59  
60

## Supplementary material

### Supplementary Text S2- Sensitivity analyses

#### 1. Impact of prevalence on admission on health outcomes and costs

The prevalence of ESBL-PE carriage on ICU admission highly influenced health outcomes and costs (**Supplementary Figure S1**) as well as the ranking of the strategies (**Supplementary Table S1**). However, improvement of HH to 80%/80% (Strategy 2) remained the most cost saving strategy, if the prevalence on admission was from 5% to 50%. If 50% of patients carried ESBL-PE on ICU admission, Strategy 2 was dominated by screening + cohorting (Strategy 6).

**Figure S1** Impact of prevalence on admission on the number of ESBL-PE infections and total cost of strategies for: (1) Base Case (reference strategy with no control intervention and hand hygiene compliance of 55%/60% before/after patient contact); (2) Hand hygiene improvement to 80%/80%; (6) Screening of all admissions and cohorting of identified carriers; (7) Hand hygiene improvement to 80%/80% and Antibiotic reduction; (10) Screening of all admissions, cohorting of identified carriers and Antibiotic reduction.

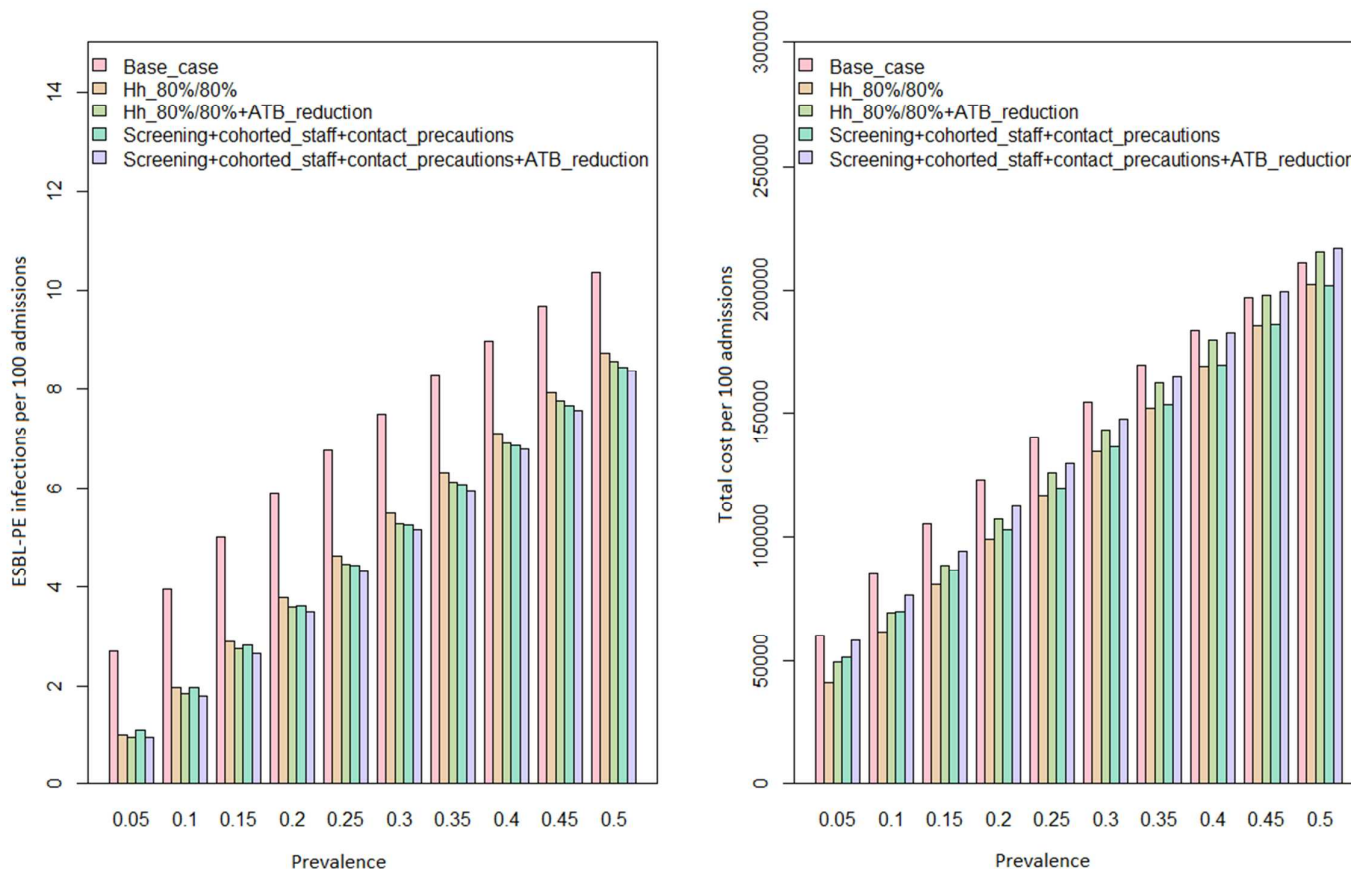

When the prevalence on admission was less than 15%, the improvement of hand hygiene to 80%/80% (Strategy 2) was the most cost-saving strategy. The second strategy on the efficiency frontier was the combination of hand hygiene 80%/80% with antibiotic reduction (Strategy 7). When the prevalence was 15%, the Strategy 10 (Screening + cohorting + ATB reduction) joined the efficiency frontier too. When the prevalence varied from 20% to 45%, Hand hygiene 80%/80% was always on the top of the ranking, followed by Screening + cohorting (Strategy 6) and Screening + cohorting + ATB reduction (Strategy 10). Finally, when 50% of patients carried ESBL-PE on ICU admission, hand hygiene was dominated by screening + cohorting (Strategy 6).

**Supplementary Table S1.** Results of sensitivity analysis. Cost-effectiveness of strategies under **different levels of ESBL-PE carriage on admission**. The prevalence on admission varied from 0.05 to 0.5.

| Strategy                                  | Prevalence on admission | Total cost/100 admissions (€) | Infections/100 admissions | Incremental cost/100 admissions ( $\Delta C$ ) (€) | Incremental effect ( $\Delta E$ ) (infections avoided/100 admissions) | ICER ( $\Delta C/\Delta E$ ) (€ / infection avoided) |
|-------------------------------------------|-------------------------|-------------------------------|---------------------------|----------------------------------------------------|-----------------------------------------------------------------------|------------------------------------------------------|
| <b>2: Hh 80%/80%</b>                      | 0.05                    | 41 225                        | 1.01                      |                                                    |                                                                       |                                                      |
| 7: Hh 80%/80% + ATB reduction             |                         | 49 639                        | 0.94                      | 8 414                                              | 0.07                                                                  | 122 909                                              |
| 6: Screening + cohorting                  |                         | 51 542                        | 1.09                      |                                                    |                                                                       | Dominated                                            |
| 10: Screening + cohorting + ATB reduction |                         | 58 218                        | 0.94                      |                                                    |                                                                       | Dominated by extended dominance                      |
| 1: Base case                              |                         | 60 031                        | 2.68                      |                                                    |                                                                       | Dominated                                            |
| <b>2: Hh 80%/80%</b>                      | 0.15                    | 80 556                        | 2.89                      |                                                    |                                                                       |                                                      |
| 7: Hh 80%/80% + ATB reduction             |                         | 88 498                        | 2.73                      | 7 942                                              | 0.16                                                                  | 49 055                                               |
| 10: Screening + cohorting + ATB reduction |                         | 94 313                        | 2.63                      | 5 815                                              | 0.09                                                                  | 62 005                                               |
| 6: Screening + cohorting                  |                         | 86 713                        | 2.80                      |                                                    |                                                                       | Dominated by extended dominance                      |
| 1: Base case                              |                         | 105 344                       | 4.99                      |                                                    |                                                                       | Dominated                                            |

|                                           |     |         |       |        |      |                                 |
|-------------------------------------------|-----|---------|-------|--------|------|---------------------------------|
| <b>2: Hh 80%/80%</b>                      | 0.2 | 98 843  | 3.77  |        |      |                                 |
| 6: Screening + cohorting                  |     | 103 075 | 3.61  | 4 232  | 0.16 | 26 631                          |
| 10: Screening + cohorting + ATB reduction |     | 112 565 | 3.49  | 9 490  | 0.12 | 77 958                          |
| 7: Hh 80%/80% + ATB reduction             |     | 107 275 | 3.59  |        |      | Dominated by extended dominance |
| 1: Base case                              |     | 123 231 | 5.90  |        |      | Dominated                       |
| <b>6: Screening + cohorting</b>           | 0.5 | 201 668 | 8.43  |        |      |                                 |
| 10: Screening + cohorting + ATB reduction |     | 216 470 | 8.36  | 14 802 | 0.07 | 208 058                         |
| 2: Hh 80%/80%                             |     | 202 288 | 8.72  |        |      | Dominated                       |
| 1: Base case                              |     | 210 957 | 10.35 |        |      | Dominated                       |
| 7: Hh 80%/80% + ATB reduction             |     | 215 102 | 8.54  |        |      | Dominated                       |

2. Impact of **probability of infection** in patients colonized with ESBL-PE.

Results of sensitivity analysis for a lower and higher probability of infection in colonized ESBL-PE patients versus the basecase analysis are presented in **Supplementary Table S2 A and B**. Overall main results of our analysis were robust to variation in the probability of infection of colonized patients (8% or 30% vs. 16% in our central analysis).

**Supplementary Table S2A** Results of sensitivity analysis. Cost-effectiveness of strategies when **the probability of infection was set at 0.08**.

| Strategy                                           | Total cost/<br>100<br>admissions<br>(€) | Infections/<br>100<br>admissions | Incremental<br>cost/100<br>admissions<br>(ΔC) (€) | Incremental<br>effect (ΔE)<br>(infections<br>avoided/100<br>admissions) | ICER (ΔC/ΔE) (€ / infection avoided) |
|----------------------------------------------------|-----------------------------------------|----------------------------------|---------------------------------------------------|-------------------------------------------------------------------------|--------------------------------------|
| <b>3: Hh 55%/80%</b>                               | 50 550                                  | 1.71                             |                                                   |                                                                         |                                      |
| 2: Hh 80%/80%                                      | 52 428                                  | 1.41                             | 1 878                                             | 0.304                                                                   | 6 178                                |
| 7: Hh 80%/80% + ATB reduction                      | 61 945                                  | 1.33                             | 9 517                                             | 0.079                                                                   | 120 468                              |
| 10: Screening + cohorting + ATB reduction          | 68 673                                  | 1.29                             | 6 728                                             | 0.046                                                                   | 146 261                              |
| 5: Screening + contact precautions                 | 54 930                                  | 2.10                             |                                                   |                                                                         | Dominated                            |
| 1: Base case                                       | 56 792                                  | 2.43                             |                                                   |                                                                         | Dominated                            |
| 8: Hh 55%/80% + ATB reduction                      | 58 173                                  | 1.53                             |                                                   |                                                                         | Dominated by extended dominance      |
| 6: Screening + cohorting                           | 59 424                                  | 1.37                             |                                                   |                                                                         | Dominated by extended dominance      |
| 9: Screening + contact precautions + ATB reduction | 59 706                                  | 1.74                             |                                                   |                                                                         | Dominated                            |
| 4: ATB reduction                                   | 60 360                                  | 1.99                             |                                                   |                                                                         | Dominated                            |

**Supplementary Table S2B** Results of sensitivity analysis. Cost-effectiveness of strategies when **the probability of infection was set at 0.30**.

| Strategy                                           | Total cost/ 100 admissions (€) | Infections/ 100 admissions | Incremental cost/100 admissions (ΔC) (€) | Incremental effect (ΔE) (infections avoided/100 admissions) | ICER (ΔC/ΔE) (€ / infection avoided) |
|----------------------------------------------------|--------------------------------|----------------------------|------------------------------------------|-------------------------------------------------------------|--------------------------------------|
| <b>2: Hh 80%/80%</b>                               | 126 096                        | 5.29                       |                                          |                                                             |                                      |
| 7: Hh 80%/80% + ATB reduction                      | 131 487                        | 4.99                       | 5 391                                    | 0.296                                                       | 18 204                               |
| 10: Screening + cohorting + ATB reduction          | 135 825                        | 4.82                       | 4 338                                    | 0.172                                                       | 25 283                               |
| 6: Screening + cohorting                           | 130 896                        | 5.13                       |                                          |                                                             | Dominated by extended dominance      |
| 8: Hh 55%/80% + ATB reduction                      | 137 917                        | 5.72                       |                                          |                                                             | Dominated                            |
| 3: Hh 55%/80%                                      | 140 124                        | 6.43                       |                                          |                                                             | Dominated                            |
| 9: Screening + contact precautions + ATB reduction | 150 335                        | 6.50                       |                                          |                                                             | Dominated                            |
| 5: Screening + contact precautions                 | 164 370                        | 7.85                       |                                          |                                                             | Dominated                            |
| 4: ATB reduction                                   | 164 513                        | 7.48                       |                                          |                                                             | Dominated                            |
| 1: Base case                                       | 183 951                        | 9.13                       |                                          |                                                             | Dominated                            |



### 3. Impact of lower compliance with HH than in the base case scenario.

If the baseline compliance with HH was lower than in our core analysis, e.g. 20% before and 40% after patient contact, HH improvement, e.g. to 50%/60% was confirmed to be cost-saving. Screening + cohorting was the second strategy with an ICER of €3 236/infection avoided vs. HH improvement (**Supplementary Table S3**).

**Supplementary Table S3** Results of sensitivity analysis. Cost-effectiveness of strategies when the baseline compliance with **Hand hygiene was set to 20%/40% (instead of 55%/60%)**.

| Strategy                                           | Total cost/ 100 admissions (€) | Infections/ 100 admissions | Incremental cost/100 admissions (ΔC) (€) | Incremental effect (ΔE) (infections avoided/100 admissions) | ICER (ΔC/ΔE) (€ / infection avoided) |
|----------------------------------------------------|--------------------------------|----------------------------|------------------------------------------|-------------------------------------------------------------|--------------------------------------|
| 2: Hh 50%/60%                                      | 81 676                         | 3.14                       |                                          |                                                             |                                      |
| 6: Screening + cohorting                           | 82 867                         | 2.772                      | 1 191                                    | 0.368                                                       | 3 236                                |
| 10: Screening + cohorting + ATB reduction          | 91 134                         | 2.632                      | 8 267                                    | 0.14                                                        | 59 050                               |
| 3: Hh 20%/60%                                      | 85 059                         | 3.758                      |                                          |                                                             | Dominated                            |
| 8: Hh 20%/60% + ATB reduction                      | 87 440                         | 3.284                      |                                          |                                                             | Dominated                            |
| 7: Hh 50%/60% + ATB reduction                      | 88 144                         | 2.891                      |                                          |                                                             | Dominated by extended dominance      |
| 9: Screening + contact precautions + ATB reduction | 93 552                         | 3.741                      |                                          |                                                             | Dominated                            |
| 4: ATB reduction                                   | 95 195                         | 4.075                      |                                          |                                                             | Dominated                            |
| 5: Screening + contact precautions                 | 97 350                         | 4.571                      |                                          |                                                             | Dominated                            |
| 1: Base case Hh 20% 40%                            | 100 905                        | 5.02                       |                                          |                                                             | Dominated                            |

1  
2  
3  
4  
5  
6  
7 4. Impact of lower **sensitivity to detect ESBL-PE carriage** in screening strategies.  
8

9  
10 If the sensitivity to detect ESBL-PE on ICU admission was lower than in our core analysis and varied from 80% to 95%, HH 80%/80% (Strategy  
11 2) and HH 80%/80% and antibiotic reduction (Strategy 7) always dominated the screening strategies (Strategy 6 and 10) (**Supplementary**  
12 **Figure S2**).  
13  
14  
15  
16  
17  
18  
19  
20  
21  
22  
23  
24  
25  
26  
27  
28  
29  
30  
31  
32  
33  
34  
35  
36  
37  
38  
39  
40  
41  
42  
43  
44  
45  
46  
47  
48  
49

1  
2  
3  
4  
5  
6  
7  
8  
9  
10  
11  
12  
13  
14  
15  
16  
17  
18  
19  
20  
21  
22  
23  
24  
25  
26  
27  
28  
29  
30  
31  
32  
33  
34  
35  
36  
37  
38  
39  
40  
41  
42  
43  
44  
45  
46  
47  
48  
49

**Figure S2** Cost-effectiveness plane showing the incremental health benefits (infections avoided) and costs of screening and cohorting strategies relative to the Strategy 2. The sensitivity of detection of ESBL carriers at ICU admission in screening and isolation strategies varied from 80% to 95%. Strategies are: (2) Hand hygiene improvement to 80%/80%; (6) Screening of all admissions and cohorting of identified carriers; (7) Hand hygiene improvement to 80%/80% and Antibiotic reduction; (10) Screening of all admissions, cohorting of identified carriers and Antibiotic reduction.

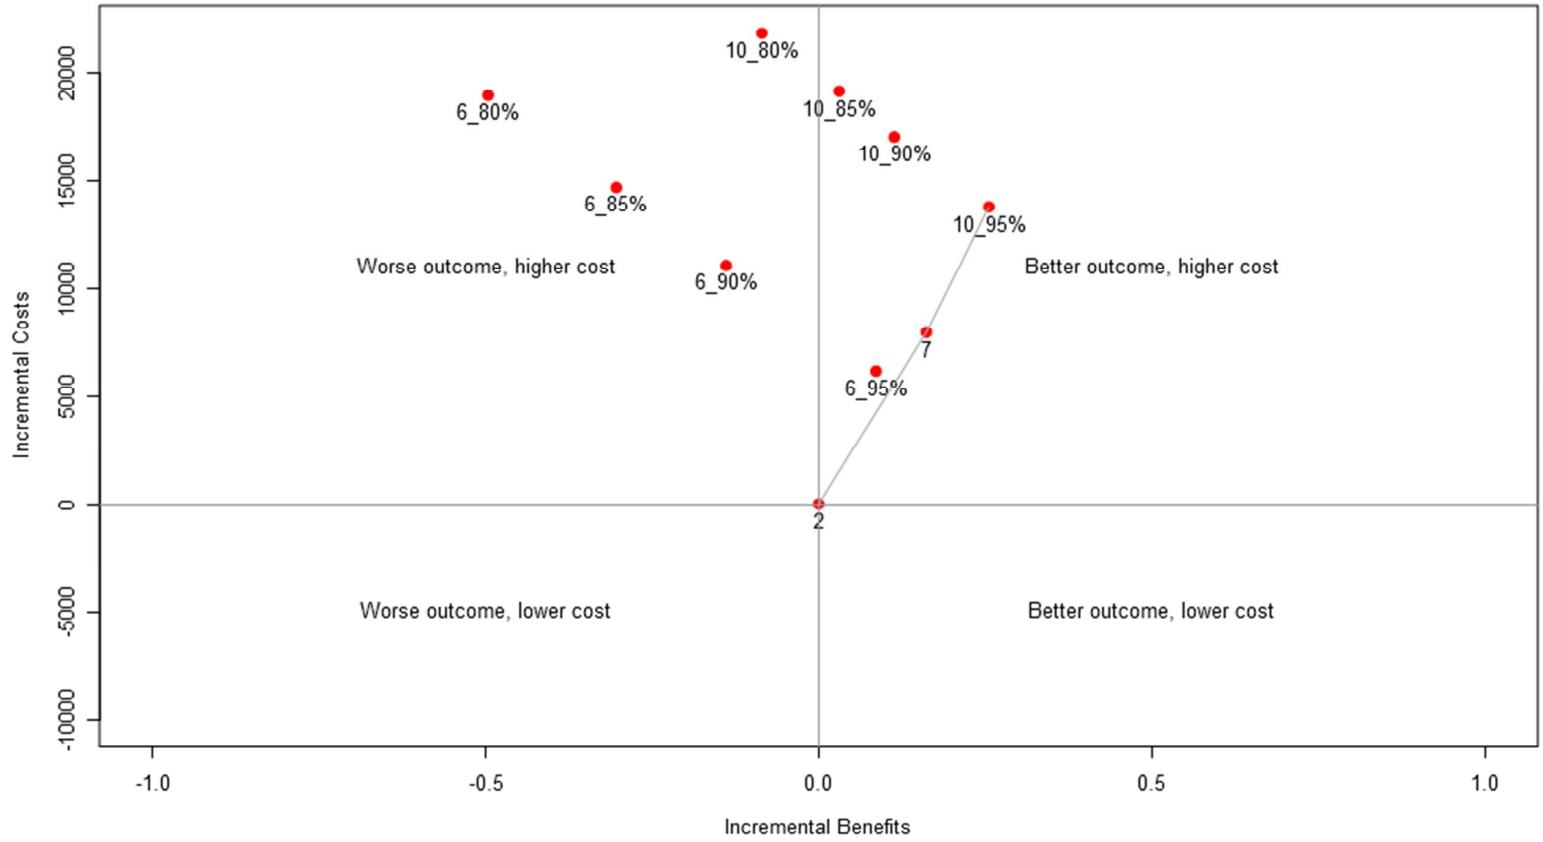

**Supplementary Table S4A** Impact of infection control nurse's time working on the hand hygiene program and the level of hand hygiene achieved on model predictions compared to the Base case strategy. The cost-effective ratio (CER) was calculated when the hand hygiene strategy was more expensive but more effective than the base case.

| Level of hand hygiene before contact with patient (%) | Level of hand hygiene after contact with patient (%) | Mean increase in hand hygiene from baseline (%) | Number of infections /100 admissions | Total cost /100 admissions (€) | CER (vs base case)                            |
|-------------------------------------------------------|------------------------------------------------------|-------------------------------------------------|--------------------------------------|--------------------------------|-----------------------------------------------|
| <b>Base case</b>                                      |                                                      |                                                 |                                      |                                |                                               |
| 55                                                    | 60                                                   | -                                               | 4.99                                 | 105 344                        | -                                             |
| <b>ICN working on Hh program at 1/4 time</b>          |                                                      |                                                 |                                      |                                |                                               |
| 55                                                    | 60                                                   | 0.0                                             | 4.99                                 | 112 783                        | Hh strategy dominated by the Base case        |
| 60                                                    | 60                                                   | 2.5                                             | 4.65                                 | 106 497                        | 3 433                                         |
| 55                                                    | 65                                                   | 2.5                                             | 4.64                                 | 106 366                        | 2 965                                         |
| 60                                                    | 65                                                   | <b>5.0</b>                                      | <b>4.29</b>                          | <b>99 722</b>                  | <b>Base case dominated by the Hh strategy</b> |
| ⋮                                                     | ⋮                                                    | ⋮                                               | ⋮                                    | ⋮                              | Base case dominated by the Hh strategy        |
| 80                                                    | 80                                                   | 22.5                                            | 2.89                                 | 74 103                         | Base case dominated by the Hh strategy        |
| <b>ICN working on Hh strategy at 1/2 time</b>         |                                                      |                                                 |                                      |                                |                                               |
| 55                                                    | 60                                                   | 0.0                                             | 4.99                                 | 120 222                        | Hh strategy dominated by the Base case        |
| 60                                                    | 60                                                   | 2.5                                             | 4.65                                 | 113 789                        | 25 146                                        |
| 55                                                    | 65                                                   | 2.5                                             | 4.64                                 | 113 675                        | 24 160                                        |
| 60                                                    | 65                                                   | 5.0                                             | 4.29                                 | 106 861                        | 2 182                                         |
| 65                                                    | 65                                                   | <b>7.5</b>                                      | <b>4.02</b>                          | <b>101 484</b>                 | <b>Base case dominated by the Hh strategy</b> |
| ⋮                                                     | ⋮                                                    | ⋮                                               | ⋮                                    | ⋮                              | Base case dominated by the Hh strategy        |
| 80                                                    | 80                                                   | 22.5                                            | 2.89                                 | 80 556                         | Base case dominated by the Hh strategy        |
| <b>ICN working on Hh strategy at full time</b>        |                                                      |                                                 |                                      |                                |                                               |
| 55                                                    | 60                                                   | 0.0                                             | 4.99                                 | 135 100                        | Hh strategy dominated by the Base case        |
| 60                                                    | 60                                                   | 2.5                                             | 4.65                                 | 128 375                        | 68 573                                        |
| 55                                                    | 65                                                   | 2.5                                             | 4.64                                 | 128 292                        | 66 551                                        |

1  
2  
3  
4  
5  
6  
7  
8  
9  
10  
11  
12  
13  
14  
15  
16  
17  
18  
19  
20  
21  
22  
23  
24  
25  
26  
27  
28  
29  
30  
31  
32  
33  
34  
35  
36  
37  
38  
39  
40  
41  
42  
43  
44  
45  
46  
47  
48  
49

|    |    |      |      |         |                                        |
|----|----|------|------|---------|----------------------------------------|
| 60 | 65 | 5.0  | 4.29 | 121 137 | 22 712                                 |
| 65 | 65 | 7.5  | 4.02 | 115 442 | 10 397                                 |
| 55 | 70 | 5.0  | 4.22 | 119 423 | 18 278                                 |
| 60 | 70 | 7.5  | 3.98 | 114 488 | 9 029                                  |
| 65 | 70 | 10.0 | 3.75 | 110 092 | 3 823                                  |
| 70 | 70 | 12.5 | 3.53 | 105 942 | 411                                    |
| 55 | 75 | 7.5  | 3.85 | 111 932 | 5 806                                  |
| 60 | 75 | 10.0 | 3.68 | 108 574 | 2 468                                  |
| 65 | 75 | 12.5 | 3.51 | 105 357 | 9                                      |
| 70 | 75 | 15.0 | 3.32 | 101 754 | Base case dominated by the Hh strategy |
| ⋮  | ⋮  | ⋮    | ⋮    | ⋮       | Base case dominated by the Hh strategy |
| 80 | 80 | 22.5 | 2.89 | 93 462  | Base case dominated by the Hh strategy |

**Supplementary Table S4B** Impact of infection control nurse's time working on the hand hygiene strategy and the level of hand hygiene achieved on model predictions compared to the Screening and cohorting strategy. The cost-effective ratio (CER) was calculated when the screening and cohorting strategy was more expensive but more effective than the hand hygiene.

| Level of hand hygiene before contact with patient (%) | Level of hand hygiene after contact with patient (%) | Mean increase in hand hygiene from baseline (%) | Number of infections/100 admissions | Total cost/100 admissions (€) | CER (vs Hand hygiene strategy)                   |
|-------------------------------------------------------|------------------------------------------------------|-------------------------------------------------|-------------------------------------|-------------------------------|--------------------------------------------------|
| <b>Screening and cohorting</b>                        |                                                      |                                                 |                                     |                               |                                                  |
| 55 (with non cohorted patients)                       | 60 (with non cohorted patients)                      |                                                 | 2,80                                | 86 713                        |                                                  |
| <b>ICN working on Hh strategy at 1/4 time</b>         |                                                      |                                                 |                                     |                               |                                                  |
| 55                                                    | 60                                                   | 0,0                                             | 4,99                                | 112 783                       | Hh strategy dominated by Screening and cohorting |
| :                                                     | :                                                    | :                                               | :                                   | :                             | Hh strategy dominated by Screening and cohorting |
| 70                                                    | 70                                                   | 12,5                                            | 3,53                                | 85 621                        | 1 496                                            |
| 55                                                    | 75                                                   | 7,5                                             | 3,85                                | 91 212                        | Hh strategy dominated by Screening and cohorting |
| 60                                                    | 75                                                   | 10,0                                            | 3,68                                | 88 104                        | Hh strategy dominated by Screening and cohorting |
| 65                                                    | 75                                                   | 12,5                                            | 3,51                                | 85 102                        | 2 283                                            |
| 70                                                    | 75                                                   | 15,0                                            | 3,32                                | 81 748                        | 9 554                                            |
| 75                                                    | 75                                                   | 17,5                                            | 3,15                                | 78 568                        | 23 561                                           |
| 55                                                    | 80                                                   | 10,0                                            | 3,51                                | 84 751                        | 2 763                                            |
| 60                                                    | 80                                                   | 12,5                                            | 3,38                                | 82 408                        | 7 507                                            |
| 65                                                    | 80                                                   | 15,0                                            | 3,24                                | 79 993                        | 15 442                                           |
| 70                                                    | 80                                                   | 17,5                                            | 3,12                                | 77 946                        | 28 012                                           |
| 75                                                    | 80                                                   | 20,0                                            | 2,99                                | 75 742                        | 58 203                                           |
| 80                                                    | 80                                                   | 22,5                                            | 2,89                                | 74 103                        | 146 278                                          |
| <b>ICN working on Hh strategy at 1/2 time</b>         |                                                      |                                                 |                                     |                               |                                                  |
| 55                                                    | 60                                                   | 0,0                                             | 4,99                                | 120 222                       | Hh strategy dominated by Screening and cohorting |
| :                                                     | :                                                    | :                                               | :                                   | :                             | Hh strategy dominated by Screening and cohorting |
| 75                                                    | 75                                                   | 17,5                                            | 3,15                                | 85 136                        | 4 561 €                                          |

1  
2  
3  
4  
5  
6  
7  
8  
9  
10  
11  
12  
13  
14  
15  
16  
17  
18  
19  
20  
21  
22  
23  
24  
25  
26  
27  
28  
29  
30  
31  
32  
33  
34  
35  
36  
37  
38  
39  
40  
41  
42  
43  
44  
45  
46  
47  
48  
49

|                                                |    |      |      |         |                                                  |
|------------------------------------------------|----|------|------|---------|--------------------------------------------------|
| 55                                             | 80 | 10,0 | 3,51 | 91 498  | Hh strategy dominated by Screening and cohorting |
| 60                                             | 80 | 12,5 | 3,38 | 89 094  | Hh strategy dominated by Screening and cohorting |
| 65                                             | 80 | 15,0 | 3,24 | 86 608  | Hh strategy dominated by Screening and cohorting |
| 70                                             | 80 | 17,5 | 3,12 | 84 516  | 7 023 €                                          |
| 75                                             | 80 | 20,0 | 2,99 | 82 227  | 23 801 €                                         |
| 80                                             | 80 | 22,5 | 2,89 | 80 556  | 71 424 €                                         |
| <b>ICN working on Hh strategy at full time</b> |    |      |      |         |                                                  |
| 55                                             | 60 | 0,0  | 4,99 | 135 100 | Hh strategy dominated by Screening and cohorting |
| ⋮                                              | ⋮  | ⋮    | ⋮    | ⋮       | Hh strategy dominated by Screening and cohorting |
| 80                                             | 80 | 22,5 | 2,89 | 93 462  | Hh strategy dominated by Screening and cohorting |

Supplementary Figure S3 Results of probabilistic sensitivity analysis. Cost-effectiveness plane shows the incremental health benefits (infections avoided) and costs for Screening and cohorting (Strategy 6), relative to horizontal strategies: A) Hand hygiene improvement to 80%/80% (Strategy 2); B) Hand hygiene improvement to 55%/80% (Strategy3); C) Antibiotic reduction (Strategy 4). The frequency that the Strategy 6 was in one of four quadrant of CE plane is represented by “p”.

A)

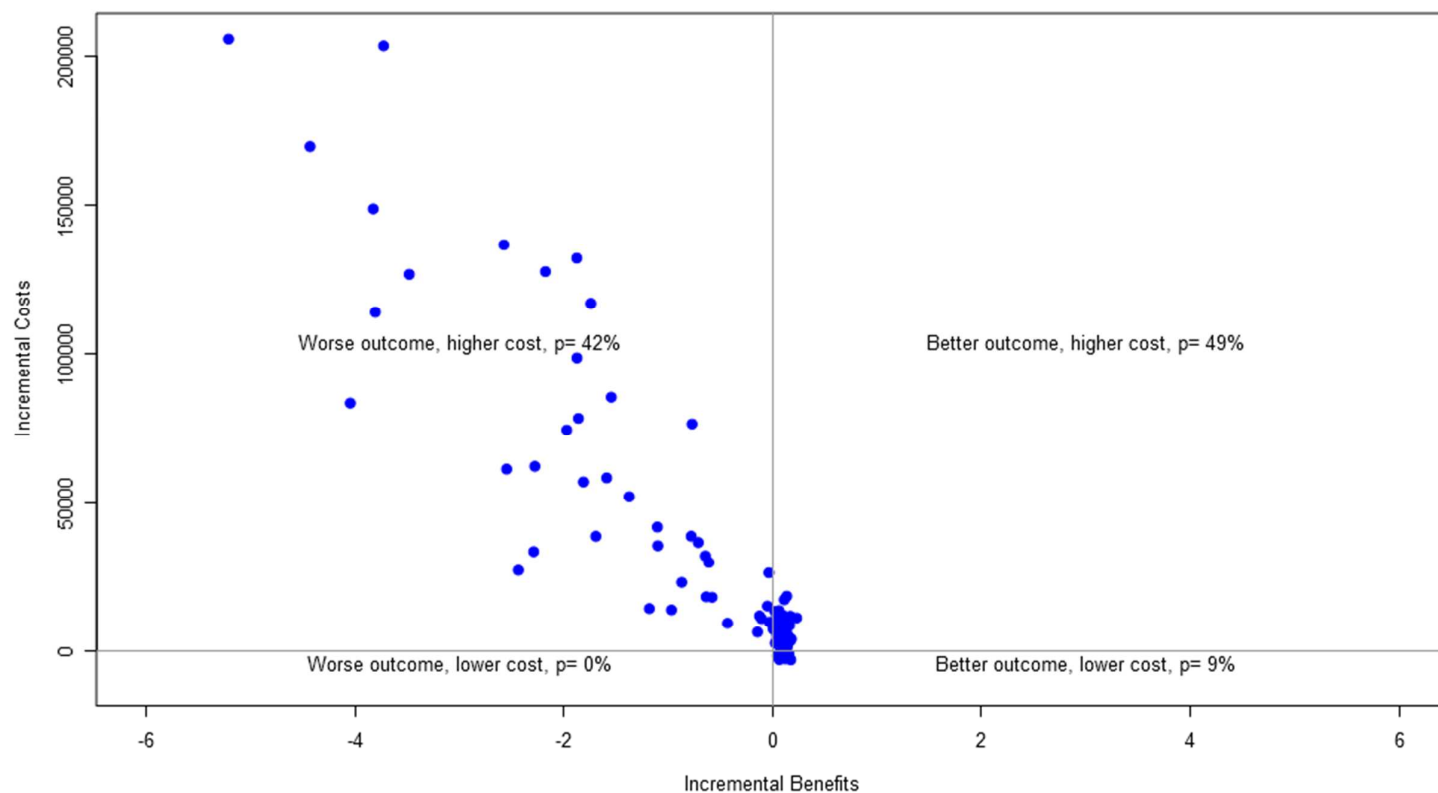



1  
2  
3  
4  
5  
6  
7  
8  
9  
10  
11  
12  
13  
14  
15  
16  
17  
18  
19  
20  
21  
22  
23  
24  
25  
26  
27  
28  
29  
30  
31  
32  
33  
34  
35  
36  
37  
38  
39  
40  
41  
42  
43  
44  
45  
46  
47  
48  
49

B)

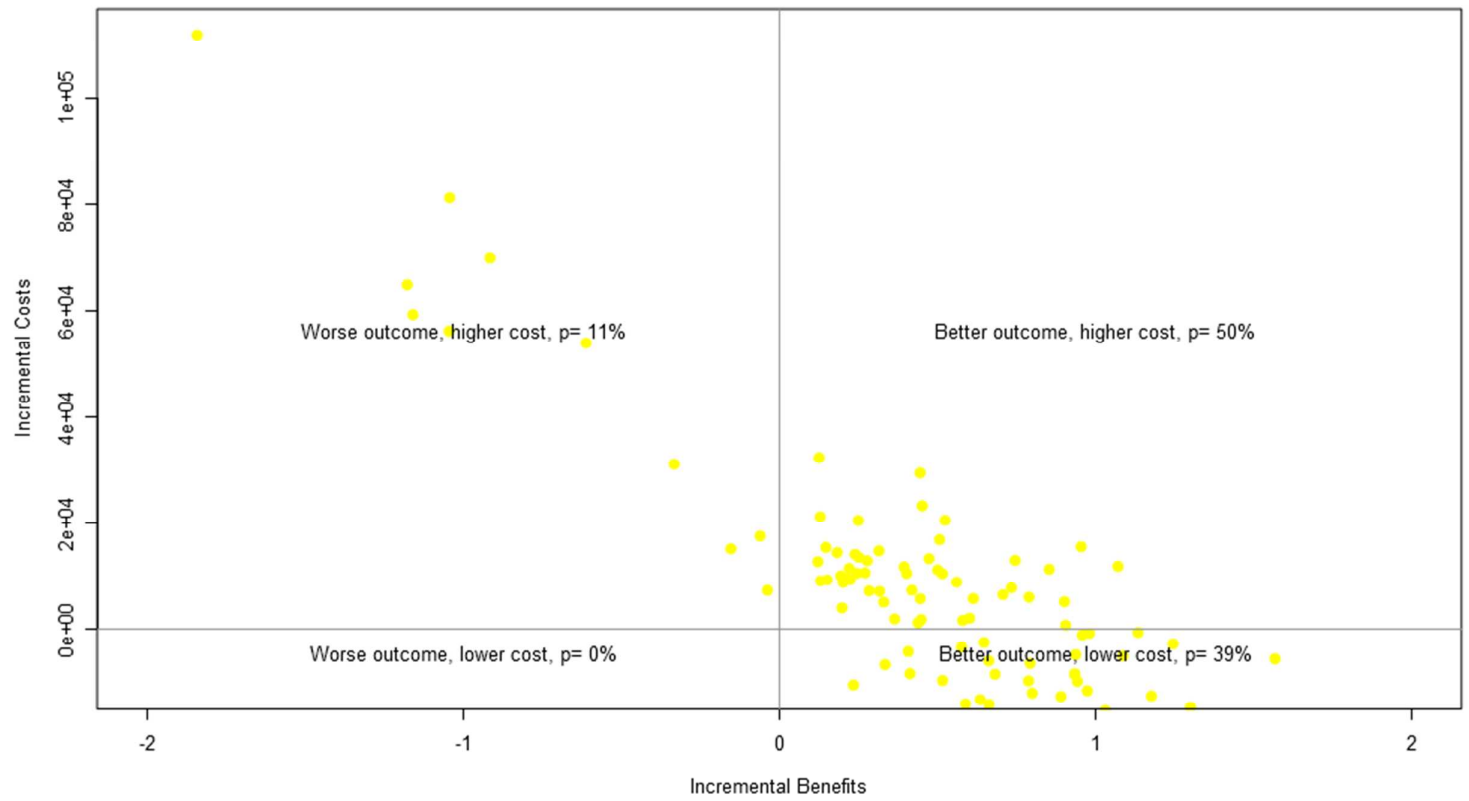

c)

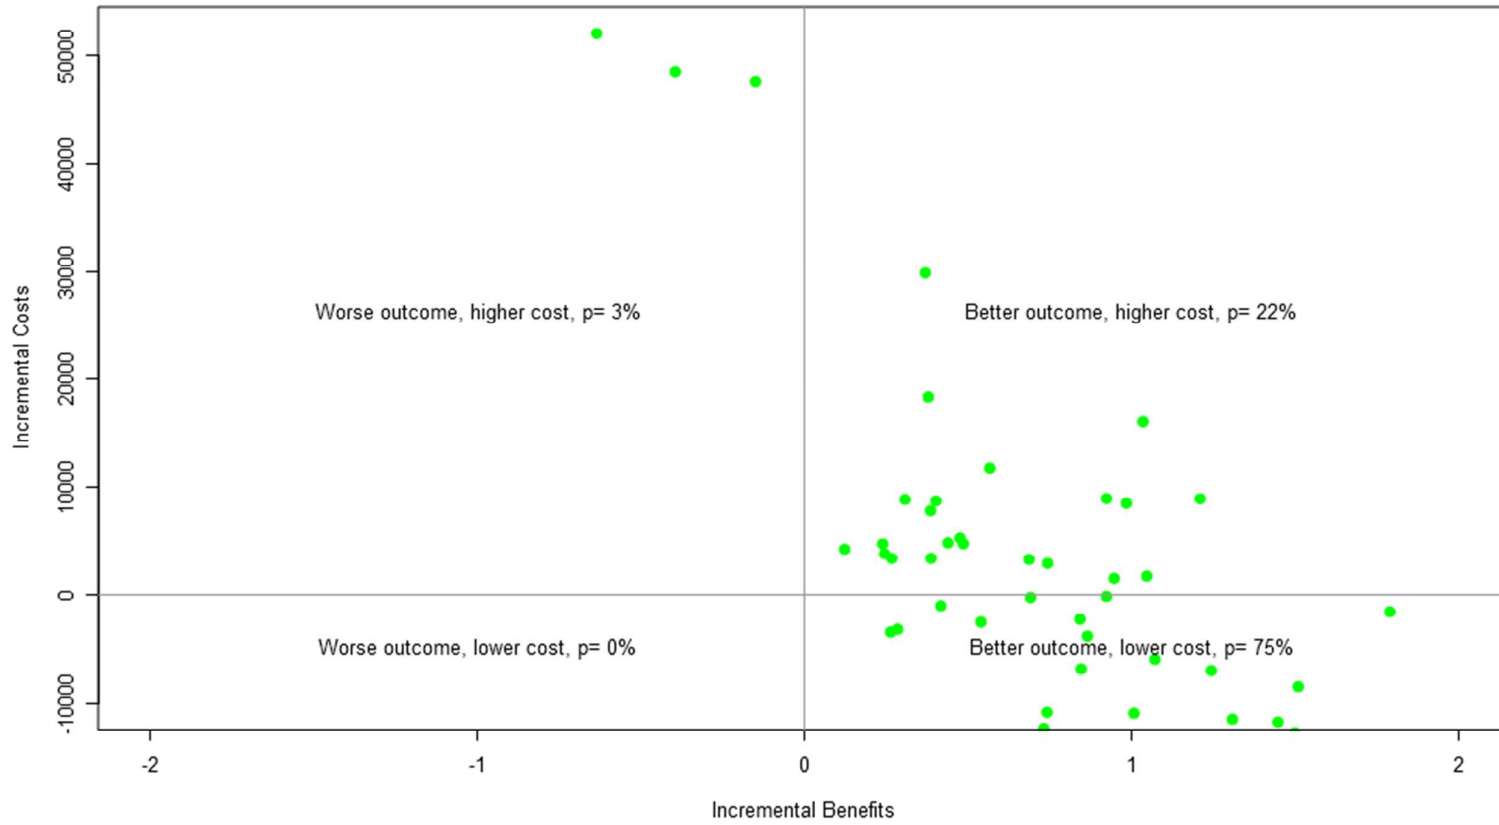

1  
2  
3  
4  
5  
6  
7  
8  
9  
10  
11  
12  
13  
14  
15  
16  
17  
18  
19  
20  
21  
22  
23  
24  
25  
26  
27  
28  
29  
30  
31  
32  
33  
34  
35  
36  
37  
38  
39  
40  
41  
42  
43  
44  
45  
46  
47  
48  
49

**Supplementary Figure S4** Results of probabilistic sensitivity analysis. Cost-effectiveness plane shows the incremental health benefits (infections avoided) and costs for Screening and contact precautions (Strategy 5), relative to horizontal strategies: A) Hand hygiene improvement to 80%/80% (Strategy 2); B) Hand hygiene improvement to 55%/80% (Strategy 3); C) Antibiotic reduction (Strategy 4). The frequency that the Strategy 6 was in one of four quadrant of CE plane is represented by “p”.

A)

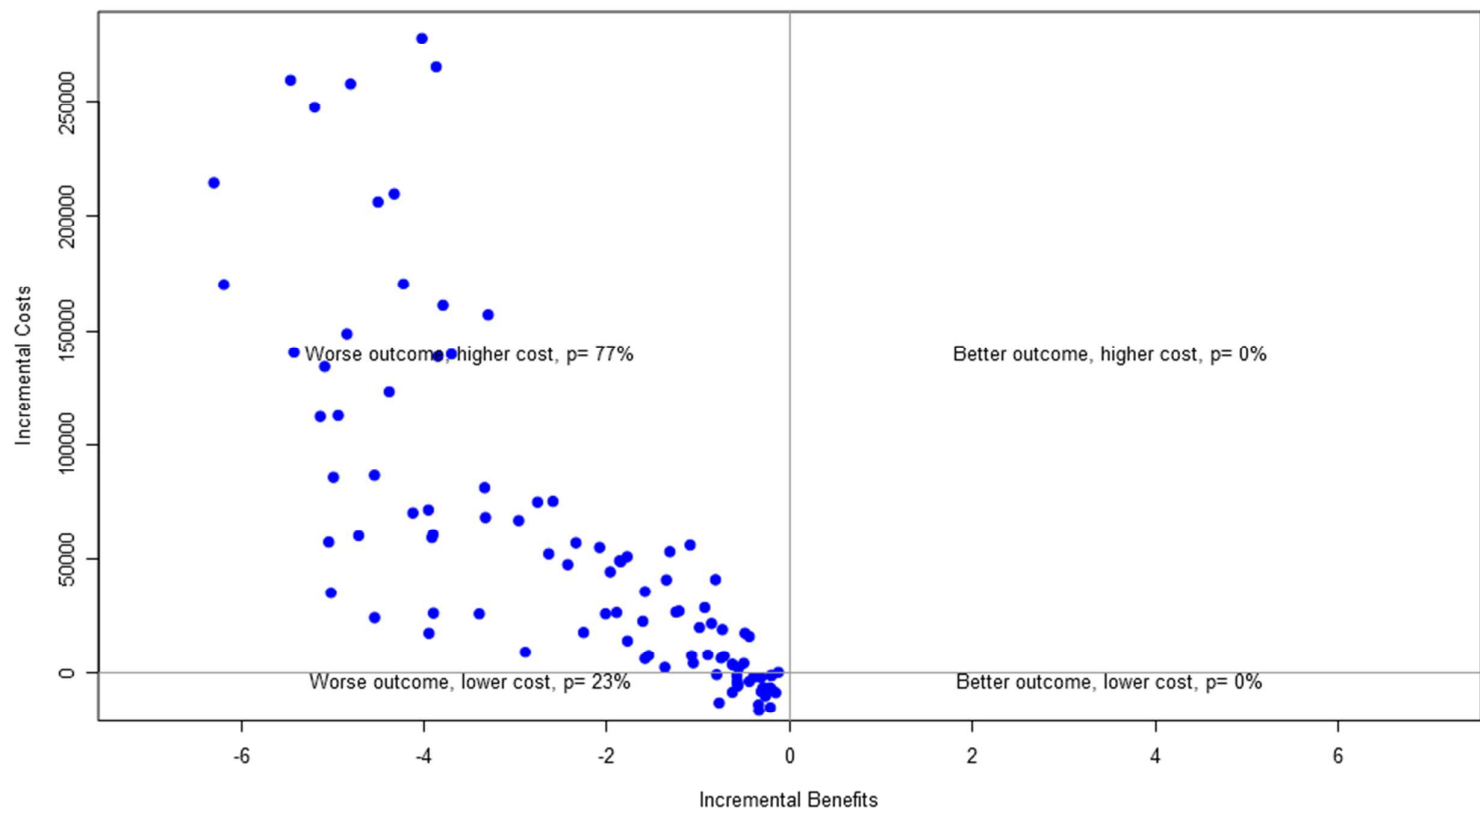

B)

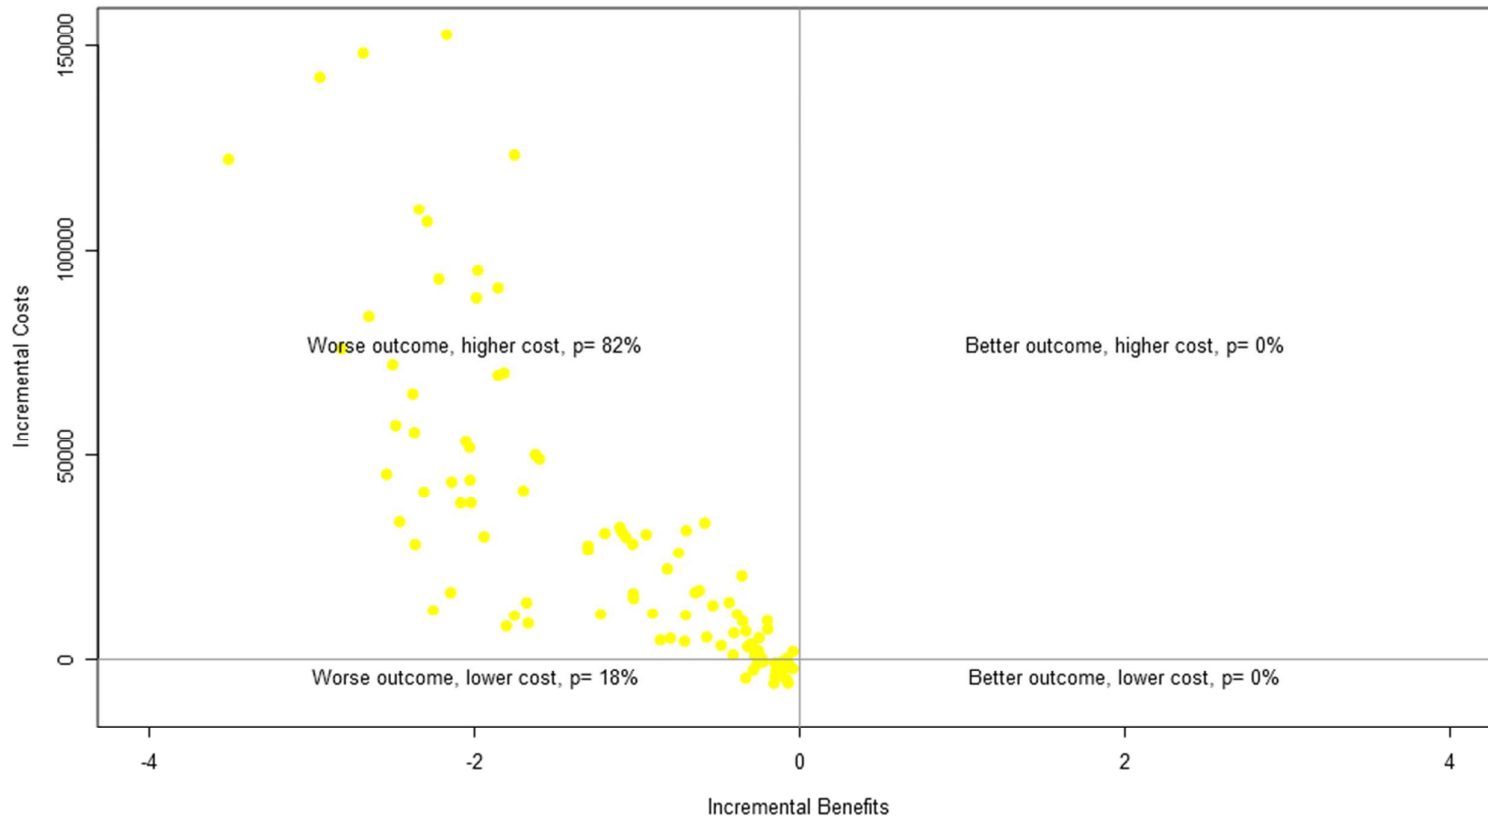

1  
2  
3  
4  
5  
6  
7  
8  
9  
10  
11  
12  
13  
14  
15  
16  
17  
18  
19  
20  
21  
22  
23  
24  
25  
26  
27  
28  
29  
30  
31  
32  
33  
34  
35  
36  
37  
38  
39  
40  
41  
42  
43  
44  
45  
46  
47  
48  
49

c)

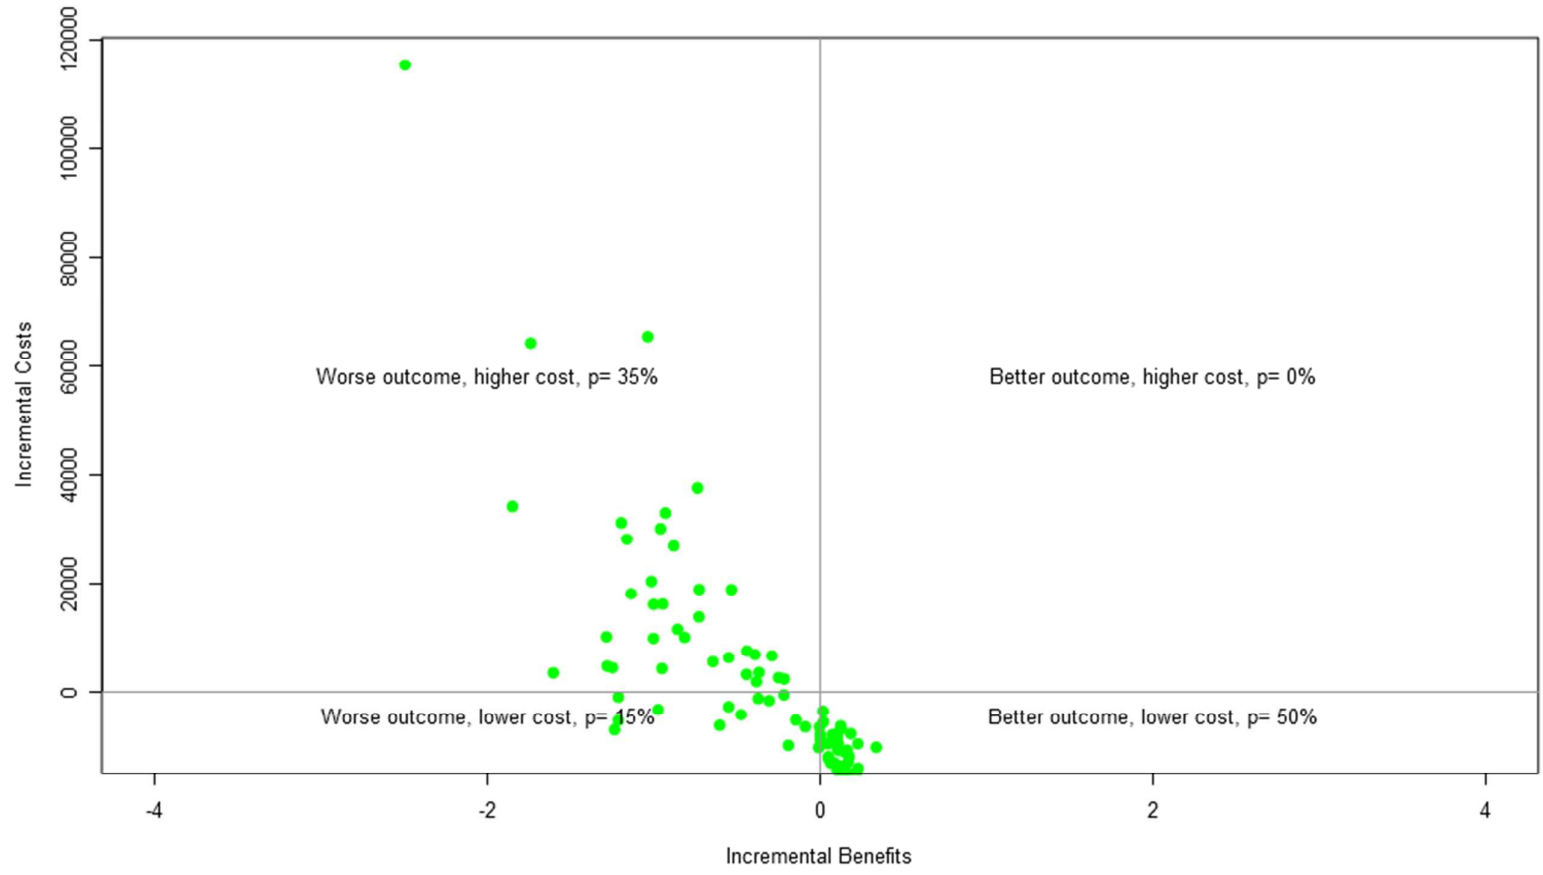

# BMJ Open

## Universal or targeted approach to prevent the transmission of extended-spectrum beta-lactamase-producing Enterobacteriaceae in intensive care units? A cost-effectiveness analysis

|                                 |                                                                                                                                                                                                                                                                                                                                                                                                                                                                                                  |
|---------------------------------|--------------------------------------------------------------------------------------------------------------------------------------------------------------------------------------------------------------------------------------------------------------------------------------------------------------------------------------------------------------------------------------------------------------------------------------------------------------------------------------------------|
| Journal:                        | <i>BMJ Open</i>                                                                                                                                                                                                                                                                                                                                                                                                                                                                                  |
| Manuscript ID                   | bmjopen-2017-017402.R1                                                                                                                                                                                                                                                                                                                                                                                                                                                                           |
| Article Type:                   | Research                                                                                                                                                                                                                                                                                                                                                                                                                                                                                         |
| Date Submitted by the Author:   | 01-Aug-2017                                                                                                                                                                                                                                                                                                                                                                                                                                                                                      |
| Complete List of Authors:       | Sloma, Lidia; Inserm UMR 1137, UMR 1137 – UFR de Médecine Paris 7 Denis Diderot<br>Lucet, Jean-Christophe ; INSERM, UMR 1137<br>perozziello, anne; Inserm, UMR 1137<br>Pelat, Camille; Inserm, UMR 1137<br>Birgand, Gabriel; Assistance Publique - Hopitaux de Paris<br>Ruppé, Etienne; Assistance Publique - Hopitaux de Paris<br>Boelle, Pierre-Yves; INSERM UMR S 707, ; INSERM, U707<br>Andremont, Antoine; Assistance Publique - Hopitaux de Paris<br>yazdanpanah, yazdan; INSERM, UMR 1137 |
| <b>Primary Subject Heading</b>: | Infectious diseases                                                                                                                                                                                                                                                                                                                                                                                                                                                                              |
| Secondary Subject Heading:      | Epidemiology, Health economics, Public health, Intensive care, Health policy                                                                                                                                                                                                                                                                                                                                                                                                                     |
| Keywords:                       | Infection control < INFECTIOUS DISEASES, Adult intensive & critical care < INTENSIVE & CRITICAL CARE, Cost-effectiveness                                                                                                                                                                                                                                                                                                                                                                         |
|                                 |                                                                                                                                                                                                                                                                                                                                                                                                                                                                                                  |

SCHOLARONE™  
Manuscripts

1  
2  
3 1 Intended category: Research  
4  
5

6 2 **Universal or targeted approach to prevent the transmission of**  
7  
8  
9 3 **extended-spectrum beta-lactamase-producing *Enterobacteriaceae* in**  
10  
11 4 **intensive care units? A cost-effectiveness analysis**  
12  
13

14  
15 5 Lidia Kardaś-Słoma, PhD;<sup>1,2</sup>, Jean-Christophe Lucet, Prof;<sup>1,2,3</sup>, Anne Perozziello, MS,<sup>1,2</sup>,  
16 6 Camille Pelat, PhD;<sup>1,2</sup>, Gabriel Birgand, PhD;<sup>1,2,3</sup>, Etienne Ruppé, PhD;<sup>4</sup>, Pierre-Yves  
17 7 Boëlle, Prof;<sup>5</sup>, Antoine Andremont, Prof;<sup>4</sup> and Yazdan Yazdanpanah, Prof<sup>1,2,6</sup>  
18  
19

20  
21  
22 8 <sup>1</sup> INSERM, Infection, Antimicrobials, Modelisation, Evolution (IAME), UMR 1137, F-75018  
23 9 Paris, France  
24  
25

26  
27 10 <sup>2</sup>University of Paris Diderot, IAME, UMR 1137, Sorbonne Paris Cité, F-75018 Paris, France  
28  
29

30  
31 11 <sup>3</sup> AP-HP, Bichat-Claude Bernard Hospital, Infection Control Unit, F-75018 Paris, France  
32

33 12 <sup>4</sup>AP-HP, Bichat-Claude Bernard Hospital, Bacteriology Laboratory, F-75018 Paris, France  
34

35 13 <sup>5</sup> Sorbonne University, UPMC Univ Paris 06, INSERM, Pierre Louis Institute of Epidemiology  
36 14 and Public Health (IPLESP UMRS 1136), 75012, Paris, France  
37  
38

39 15 <sup>6</sup>AP-HP, Bichat-Claude Bernard Hospital, Infectious and Tropical Diseases Department, F-75018  
40 16 Paris, France  
41  
42

43  
44 17 ***Corresponding author:***  
45

46  
47 18 Lidia Kardaś-Słoma  
48

49  
50 19 University of Paris Diderot, Inserm-IAME, UMR 1137  
51

52  
53 20 16, rue Henri Huchard, 75018 Paris, France  
54  
55

56  
57 21 E-mail address: [lidia.kardas@inserm.fr](mailto:lidia.kardas@inserm.fr)  
58  
59  
60

## 22 ABSTRACT

### 23 Objective

24 Several control strategies have been used to limit the transmission of multidrug-resistant  
25 organisms in hospitals. However, their implementation is expensive and effectiveness of  
26 interventions for the control of extended-spectrum beta-lactamase-producing *Enterobacteriaceae*  
27 (ESBL-PE) spread is controversial. Here we aim to assess the cost-effectiveness of hospital-based  
28 strategies to prevent ESBL-PE transmission and infections.

### 29 Design

30 Cost-effectiveness analysis based on dynamic, stochastic transmission model over a one-year  
31 time horizon.

### 32 Patients and setting

33 Patients hospitalized in a hypothetical 10- bed intensive care unit (ICU) in a high-income  
34 country.

### 35 Interventions

36 Base case scenario compared to 1) universal strategies (e.g. improvement of hand hygiene (HH)  
37 among healthcare workers (HCWs), antibiotic stewardship), 2) targeted strategies (e.g. screening  
38 of patient for ESBL-PE at ICU admission and contact precautions or cohorting of carriers) and 3)  
39 mixed strategies (e.g. targeted approaches combined with antibiotic stewardship).

### 40 Main Outcomes and Measures:

41 Cases of ESBL-PE transmission, infections, cost of intervention, cost of infections, incremental  
42 cost per infection avoided.

### 43 Results



1  
2  
3 44 In the base case scenario, 15 transmissions and 5 infections due to ESBL-PE occurred per 100  
4  
5 45 ICU admissions, representing a mean cost of €94 792. All control strategies improved health  
6  
7 46 outcomes and reduced costs associated with ESBL-PE infections. The overall costs (cost of  
8  
9 47 intervention and infections) were the lowest for HH compliance improvement from 55%/60%  
10  
11 48 before/after contact with a patient to 80%/80%.

12  
13 49 Two strategies required higher investments than the HH programme, but also improved health  
14  
15 50 benefits; 1) HH improvement to 80%/80% combined with antibiotic stewardship and 2) screening  
16  
17 51 and cohorting strategy combined with antibiotic stewardship.

## 52 **Conclusions**

23  
24 53 Improved compliance with HH was the most cost-saving strategy to prevent the transmission of  
25  
26 54 ESBL-PE. Antibiotic stewardship was not cost-effective. However, adding antibiotic restriction  
27  
28 55 strategy to HH or screening and cohorting strategies slightly improved their effectiveness and  
29  
30 56 may be worthy of consideration by decision-makers’.

## 31 32 33 34 35 36 58 **Strength and limitations of this study**

- 37  
38 59
- 39 60 ▪ We used a dynamic transmission model to take into account that the risk of colonization
  - 40 61 in the ICU depends on the number of ESBL-PE carriers and could change over time.
  - 41 62 ▪ Parameters used in the model were derived from recent multicentre studies.
  - 42 63 ▪ We undertook sensitivity analyses to show the impact of uncertainty in parameter
  - 43 64 estimation and the impact of model assumptions on the conclusions.
  - 44 65 ▪ Direct HCW-to-HCW transmissions as well as environmental contamination were not
  - 45 66 included in the model.
- 46  
47  
48  
49  
50  
51  
52  
53  
54  
55  
56  
57  
58  
59  
60

## 67 INTRODUCTION

68 The incidence of infection and colonization with extended-spectrum beta-lactamase-producing  
69 *Enterobacteriaceae* (ESBL-PE) has increased worldwide<sup>1-4</sup>. In Europe, in 2014, the percentage  
70 of *Escherichia coli* and *Klebsiella pneumoniae* resistant to 3<sup>rd</sup> generation cephalosporins in  
71 invasive isolates was 12% and 23%, respectively<sup>1</sup>. A similar trend was observed in the United  
72 States, although with large variations between states<sup>2</sup>.

73 In hospital settings, ESBL-PE acquisition is mainly due to indirect transmission between patients  
74 with the hands of healthcare workers (HCWs) as vectors<sup>5</sup>. Increased prevalence of colonization  
75 augments the risk of acquiring ESBL-PE infection<sup>6</sup>. Such infections represent a serious socio-  
76 economic burden and are associated with a raised mortality, more frequent hospital admissions in  
77 comparison with non-carriers, and additional costs<sup>7</sup>.

78 Many interventions have been proposed to limit the transmission of multidrug-resistant  
79 organisms (MDROs) in hospitals. They can be classified as either 1) a 'universal' or 'horizontal'  
80 approach, applied to all patients e.g. improvement of hand hygiene (HH) among HCWs or  
81 antibiotic stewardship or 2) a 'targeted' or 'vertical' approach, e.g. screening and isolation of  
82 asymptomatic carriers in addition to infected patients, with the aim of identifying carriers and  
83 implementing measures to prevent the transmission from carriers to other patients<sup>8</sup>.

84 There is general agreement that HH reduces the transmission of MDROs, especially MRSA<sup>6</sup>.  
85 However, few studies have evaluated the impact of HH on the prevention of ESBL-PE  
86 dissemination and they have provided conflicting results<sup>9,10</sup>. The effectiveness of targeted  
87 measures in controlling the spread of MDROs, and especially ESBL-PE, remains controversial.  
88 This approach is mainly recommended in high-risk units, e.g. intensive care units (ICUs)<sup>11</sup>.

1  
2  
3 89 The implementation of interventions with demonstrated effectiveness in reducing ESBL-PE  
4  
5 90 infections is associated with costs that are generally supported by hospitals. However, when  
6  
7  
8 91 evaluating implementation of an infection prevention programme, one should also take into  
9  
10 92 account savings associated with these interventions, but this has been largely ignored in previous  
11  
12  
13 93 studies.

14  
15 94 In this study, we used a mathematical model to evaluate the effectiveness and cost-effectiveness  
16  
17 95 of universal and targeted control strategies for the prevention of ESBL-PE transmission in an  
18  
19  
20 96 ICU in a high-income country.  
21

22 97

## 25 98 **METHODS**

### 28 99 The model

30 100 We extended a previously described stochastic, compartmental and dynamic model of ESBL-PE  
31  
32 101 transmission<sup>12</sup> to assess the economic impact of infection control strategies implemented in a  
33  
34  
35 102 hypothetical, ICU setting. We run the model over a one-year to capture all costs and health  
36  
37 103 effects relevant to implemented control strategies.

38  
39  
40 104 The model simulated the spread of ESBL-PE among patients through contacts with HCWs in an  
41  
42 105 ICU, taking into account hospital admissions and discharges of patients, antibiotic exposure, and  
43  
44 106 control interventions (**Figure 1**).

45  
46  
47 107 The **Supplementary Text S1** provides details of the model and its assumptions.

### 49 108 **Model simulations and outcomes**

50  
51  
52 109 Simulations of the model were performed using Gillespie's method and programmed in C++  
53  
54 110 language. The outcomes (cases of ESBL-PE transmission, infections, cost of intervention, cost of  
55  
56  
57  
58  
59  
60

1  
2  
3 111 infections) were calculated after a period of 1 year and averaged over the 1,000 Monte Carlo  
4  
5 112 simulations. Cost-effectiveness analysis and graphics were performed in R<sup>13</sup>.  
6  
7

8 113

9  
10 114 Base case scenario

11  
12 115 In the base case scenario, with no control intervention, we considered that compliance with hand  
13  
14 116 hygiene before/after contact with a patient was 55%/60% respectively<sup>14</sup> and 56% of patients  
15  
16 117 received antibiotics at ICU admission<sup>15</sup>.  
17

18  
19  
20 118 Infection control strategies

21  
22 119

23  
24  
25 120 **Universal approaches**

26  
27 121 We evaluated control strategies implemented in all patients (independently of their colonization  
28  
29 122 status), that comprised one or both of the following interventions: 1) improved compliance with  
30  
31 123 HH, and 2) antibiotic stewardship. For HH, we considered different levels of compliance. First,  
32  
33 124 compliance with HH before/after contact with a patient was improved from 55%/60% at baseline  
34  
35 125 to 55%/80% or 80%/80%. Second, antibiotic stewardship resulted in halving the proportion of  
36  
37 126 patients on antibiotics at ICU admission and in reducing by 25% the duration of antibiotic  
38  
39 127 treatment.  
40  
41  
42  
43

44 128

45  
46  
47 129 **Targeted approaches**

48  
49 130 We evaluated 2 strategies that combined screening of patients for ESBL-PE at ICU admission  
50  
51 131 and one of the following interventions implemented: 1) contact precautions (improved  
52  
53 132 compliance with HH before/after contact with carriers to 80%/80%); or 2) cohorting of ESBL-PE  
54  
55  
56  
57  
58  
59  
60

1  
2  
3 133 carriers with dedicated HCWs. HH compliance for other patients was maintained at baseline  
4  
5 134 level.

7  
8 135 **Mixed approaches**

9  
10 136 We evaluated two strategies combining the targeted approaches with antibiotic stewardship.

11  
12 137

13  
14  
15 138 Model parameters

16  
17  
18 139 Model parameters and their values are presented in **Supplementary Table 1**.

19  
20 140 Based on recent French data, we assumed that 15% of patients were colonized with ESBL-PE at  
21  
22 141 ICU admission<sup>16</sup>.

23  
24  
25 142 Infection status was not included in the model, so we estimated the number of infections by  
26  
27 143 multiplying the cumulated number of colonized patients after one year by the probability of  
28  
29 144 developing an infection during an ICU stay, set at 16.4%<sup>17</sup>. Even though this value came from a  
30  
31 145 recent large multicentre study, we also considered the impact of lower (8%) and higher (30%)  
32  
33 146 probability of infection in alternative analyses.

34  
35  
36 147

37  
38  
39 148 Costs

40  
41 149 The analysis was performed from a public hospital perspective. Cost estimates are based on  
42  
43 150 values reported in Euros from 2015 (1 € = US \$0.94). We considered the following costs in the  
44  
45 151 model: 1) costs of intervention (material resources and personnel costs), 2) costs of ESBL-PE  
46  
47 152 infections. The cost of an ESBL-PE infection was estimated using the ESBL-PE-attributable LOS  
48  
49 153 and the cost of a hospital bed-day for infected patients<sup>16,18,19</sup>. See **Table 1** for cost parameters and  
50  
51 154 **Supplementary Text 1** for more details.

52  
53  
54  
55  
56 155

1  
2  
3 156 Cost-effectiveness evaluation  
4

5  
6 157 To conduct the cost-effectiveness<sup>20</sup>, we estimated the costs associated with each intervention  
7  
8 158 implemented, and the health benefits were related to the number of avoided cases of ESBL-PE  
9  
10 159 infections. First, we determined whether any strategy was dominated by another in terms of costs  
11  
12 160 and health benefits. Second, we determined whether any strategy was dominated through  
13  
14 161 principles of extended dominance (i.e. whether the incremental cost-effectiveness ratios  
15  
16 162 [ICERs] decrease as the strategies increases in cost<sup>20,21</sup>). Finally, for the non-dominated strategies,  
17  
18 163 we calculated the incremental cost per case of infection avoided, which is the ratio of the  
19  
20 164 difference in costs between two strategies to the difference in health benefits. This process  
21  
22 165 produces an “efficient frontier” indicating more costly, but more effective strategies.  
23  
24  
25  
26

27 166  
28  
29 167 Sensitivity analysis  
30

31  
32 168 We performed supplementary analyses to assess the impact of parameter uncertainty on the  
33  
34 169 model’s predictions. We first ran a univariate sensitivity analysis to evaluate the cost-  
35  
36 170 effectiveness of strategies in settings with either low or high prevalence of patients colonized at  
37  
38 171 admission (from 5% to 50%). We also considered the impact of a lower (8%) and a higher (30%)  
39  
40 172 probability of infection in colonized patients. We then investigated the model assuming 1) a  
41  
42 173 lower baseline compliance with HH (20%/40% or 40%/50%), 2) a lower sensitivity of the  
43  
44 174 screening method used to detect ESBL-PE carriers at ICU admission, and 3) a lower, 30%  
45  
46 175 reduction in antibiotic prescribing.  
47  
48  
49

50 176  
51  
52  
53 177 We also performed an analysis to explore the uncertainty in human time required in an HH  
54  
55 178 programme and its potential effects. In this analysis, we varied the time an infection control nurse  
56  
57  
58  
59  
60

1  
2  
3 179 works on the programme (quarter-time, half-time or full-time) simultaneously with the level of  
4  
5 180 HH compliance achieved (from 55%/60% to 80%/80% before after contact).  
6  
7

8 181

9  
10 182 Finally, we performed a probabilistic sensitivity analysis to explore the effect of joint uncertainty  
11  
12 183 across parameters on the cost-effectiveness of universal vs targeted strategies. We varied the  
13  
14 184 following parameters concurrently: 1) number of HCW contacts with patients, 2) transmission  
15  
16 185 parameters, 3) length of stay of ICU patients, 4) natural decontamination rate for HCW, 5)  
17  
18 186 antibiotic initiation rate, 6) prevalence of ESBL-PE carriage among patients admitted to the ICU,  
19  
20 187 7) death rate of patients, 8) probability of infection in colonized patients and 9) cost parameters.  
21  
22

23  
24 188 We randomly sampled values from each of the parameter distributions and calculated the mean  
25  
26 189 costs and mean number of infections for each strategy (averaged over 1,000 simulations).  
27  
28

29 190

## 30 31 191 **RESULTS**

32  
33  
34 192 In the absence of control interventions (base case strategy), 15 new acquisitions (i.e.  
35  
36 193 transmissions) and 5 infections due to ESBL-PE (those from new acquisitions and in patients  
37  
38 194 colonized at admission) occurred per 100 admissions. Compared to the base case (Strategy 1), all  
39  
40 195 strategies reduced ESBL-PE acquisition and infections within one year (**Figure 2**).

41  
42  
43 196 Among universal strategies, HH compliance improvement to 80%/80% (Strategy 2) was the most  
44  
45 197 effective, resulting in a mean reduction to 2.9 acquired infections per 100 admissions. Among  
46  
47 198 targeted strategies, screening of patients on admission and cohorting of carriers (Strategy 6) was  
48  
49 199 the most effective strategy and resulted in a mean reduction to 2.8 infections per 100 admissions.  
50

51  
52 200 Screening followed by contact precautions (Strategy 5) was the least effective in comparison with  
53  
54  
55  
56  
57  
58  
59  
60

1  
2  
3 201 all other options. Adding antibiotic stewardship to HH or targeted strategies only slightly  
4  
5 202 improved their effectiveness.  
6  
7

8 203

### 10 204 **Cost-saving analysis**

12 205 In **Table 2** we present the estimated costs and outcomes over one year for all strategies. The  
14 206 mean total cost associated with the base case strategy was estimated at €105 344/100 admissions,  
16 207 €94 792 of which was related to infections and €10 552 to interventions. Investments in infection  
18 208 prevention was always cost-saving because they avoided cases of ESBL-PE infections and thus  
20 209 costs associated with these infections. For instance, when HH compliance was improved to  
22 210 80%/80%, the mean cost of the strategy implementation increased to €25 639/100 admissions,  
24 211 but the costs related to infections decreased to €54 916, resulting in an overall monetary benefit  
26 212 of €24 788/100 admissions in comparison with the base case. This strategy was associated with  
28 213 the highest savings within all evaluated strategies.  
30  
31  
32

33 214

### 36 215 **Cost-effectiveness analysis**

38 216 HH compliance improvement to 80%/80% was the least expensive strategy. However, two  
40 217 strategies required higher investments than the HH programme, but also improved health  
42 218 benefits. To help choose between strategies we calculated the incremental cost-effectiveness ratio  
44 219 (**Figure 3**). The ICER of HH improvement to 80%/80% and antibiotic stewardship (Strategy 7)  
46 220 vs. HH compliance improvement to 80%/80% was estimated at €49 055/avoided infection (**Table**  
48 221 **2**). The ICER of screening, cohorting and antibiotic stewardship (Strategy 10) vs. HH  
50 222 improvement to 80%/80% and antibiotic stewardship was estimated at €61 994/avoided infection.  
52  
53 223 Other strategies were dominated (more expensive and less effective).  
54  
55  
56  
57  
58  
59  
60



224

**Sensitivity analysis**

Findings from sensitivity analysis showed the robustness of predictions to: 1) the lower/higher prevalence of ESBL-PE carriage on ICU admission, 2) the lower/higher probability of infections in colonized patients, 3) the baseline compliance with HH lower than in our core analysis (20%/40% or 40%/50%), 4) the lower sensitivity to detect ESBL-PE carriers at ICU admission, and 5) the 30% reduction in antibiotic prescribing. Results of this analysis are shown in **Supplementary Text 2** (Figure S1 and Table S1, Table S2A and B, Table S3, Figure S2 and Table S4).

233

In a second sensitivity analysis, we focused on human time and performance to improve HH compliance. If an infection control nurse was assumed to work quarter-time, half-time or full-time on the programme, the HH compliance had to increase by at least 5%, 7.5% or 15%, respectively, to make the programme cost saving compared to the base case (**Supplementary Table S5A**).

In comparison with the screening and cohorting strategy, the HH improvement was cost-saving when an infection control nurse worked quarter-time or half-time on the programme, and HH compliance increased by at least 12.5% or 17.5%, respectively. The screening and cohorting strategy dominated the HH improvement programme when an infection control nurse was working full-time on the programme (**Supplementary Table S5B**).

244

Finally, the probabilistic sensitivity analysis showed that improvement of HH to 80%/80% (Strategy 2) was less expensive than the screening and cohorting intervention (Strategy 6) in 91%

1  
2  
3 247 of simulations. Among them, in 42% of simulations, the HH strategy was less expensive but  
4  
5 248 more effective (dominated the Strategy 6), and in 49% of runs the screening and cohorting was  
6  
7 249 more effective and more expensive (**Supplementary Figure S3**). Screening and contact  
8  
9 250 precautions (Strategy 5) were always less effective than improvement of HH to 80%/80%  
10  
11 251 (Strategy 2) (**Supplementary Figure S4**).  
12  
13  
14  
15  
16  
17

## 18 253 **DISCUSSION**

19  
20  
21 254 The impact of infection control strategies for preventing ESBL-PE transmission is controversial  
22  
23 255 because clinical studies cannot account for the multiple confounding factors, notably both  
24  
25 256 infection control measures and antibiotic stewardship. Despite several recent high-level  
26  
27 257 interventional studies (Climo et al.<sup>22</sup>; Derde et al.<sup>9</sup>; Huang et al.<sup>23</sup>), the most effective and cost-  
28  
29 258 effective interventions for controlling MDROs are still debated. Since the spread of ESBL-PE  
30  
31 259 between patients is a dynamic and complex process, modelling can help for understanding the  
32  
33 260 transmission mechanisms and deciding which intervention are to be preferred (Doan et al.<sup>24</sup>;  
34  
35 261 Grundmann et al.<sup>25</sup>).  
36  
37  
38  
39

40 262 Our model estimated the annual burden of ESBL-PE infections in a French ICU at €94 792 per  
41  
42 263 100 admissions in the base case strategy. Several prior studies have reported the cost of infections  
43  
44 264 due to multidrug resistant organisms in the ICU<sup>26-29</sup>. However, even though all authors  
45  
46 265 underlined the high costs of infections, comparison between studies remains difficult. Estimated  
47  
48 266 costs varied according to the country, but also to the population studied, e.g. patients with site-  
49  
50 267 specific or microorganism-specific infections. Moreover, the methods used to estimate the costs  
51  
52 268 were not similar in all publications.  
53  
54  
55  
56  
57  
58  
59  
60

1  
2  
3 270 In recent years, mathematical models have increasingly been used to study the cost-effectiveness  
4  
5 271 of control strategies. For example, Robotham et al.<sup>30</sup> compared a wide range of strategies to  
6  
7  
8 272 control MRSA transmission in ICUs and found that universal decolonization was the most cost-  
9  
10 273 effective option. In another study, Gidengil et al.<sup>31</sup> compared hospital strategies to prevent MRSA  
11  
12 274 transmission and infections in an ICU. They confirmed that universal decolonization was the  
13  
14  
15 275 most cost-saving.

16  
17 276 While decolonization regimens have been indicated as cost-effective for MRSA, only a few  
18  
19 277 studies have examined the effect of decolonization on ESBL-PE carriage<sup>32,33</sup>. These studies have  
20  
21 278 shown that decolonization strategies might be efficacious only in the short-term. Moreover, they  
22  
23 279 have reported the risk of emergence of resistance to antibiotics used for decolonisation, namely to  
24  
25  
26 280 colimycin, which is the last line effective therapy against carbapenemase-producing  
27  
28  
29 281 *Enterobacteriaceae*<sup>33</sup>. Thus, decolonization was not considered in our study.  
30  
31

32 282  
33  
34 283 Our study is the first to compare the effectiveness and the costs of universal and targeted control  
35  
36 284 strategies in the context of the spread of ESBL-PE in ICUs. Our model predicted that improving  
37  
38 285 HH to 80%/80% in contacts with all patients would prevent 83% of ESBL-PE acquisitions and  
39  
40 286 avoid at least two out of five infections per 100 admissions. This strategy represented the most  
41  
42  
43 287 cost-saving, with a monetary benefit of €24 788 per 100 admissions.  
44  
45

46 288 The association between HH and reduction of MDROs infections has long been known and HH  
47  
48 289 has been accepted as a crucial component of infection prevention<sup>34</sup>. HH has in addition the  
49  
50 290 benefit of being effective for reducing transmission of many resistant or susceptible bacteria<sup>34</sup>. A  
51  
52 291 recent publication reported that a programme designed to control MRSA by implementing  
53  
54  
55 292 universal components in addition to screening and contact precautions for MRSA carriers also  
56  
57  
58  
59  
60

1  
2  
3 293 effectively reduced the incidence of resistant gram-negative bacteria, the most likely being  
4  
5 294 ESBL-PE<sup>10</sup>. Thus, an HH programme designed to reduce ESBL-PE transmission may have  
6  
7  
8 295 positive effects on reducing the transmission of other microorganisms, and the overall economic  
9  
10 296 benefit of an HH programme for the hospital might be greater than reported in our study.

11  
12  
13 297 Despite the confirmed effectiveness of HH and national and international recommendations,  
14  
15 298 compliance with HH remains low and is often lower than values used in our base case  
16  
17  
18 299 analysis<sup>35,36</sup>. Furthermore, improving HH compliance from 60% to 80% may be far more difficult  
19  
20 300 and costly, challenging than improving from lower baseline level. However, we showed in a  
21  
22  
23 301 sensitivity analysis that improving HH remained the most cost-saving strategy even in a low  
24  
25 302 baseline compliance scenario. Different strategies have been suggested to improve HH in  
26  
27  
28 303 hospitals<sup>37</sup>, but the evidence-based approach is still lacking. Recently, a review<sup>38</sup> concluded that  
29  
30 304 a multimodal strategy proposed by the WHO and consisting of five components: 1) system  
31  
32 305 change, 2) training and education, 3) observation and feedback, 4) reminders in the hospital, and  
33  
34 306 5) a hospital safety climate, was effective at increasing HH among HCWs. Moreover, the authors  
35  
36  
37 307 underlined that additional measures (e.g. reward incentives for reaching a certain level of  
38  
39 308 compliance) could lead to further improvements. In our study, we assumed that a key component  
40  
41  
42 309 of an HH programme was a dedicated staff working on the programme (i.e. HH education,  
43  
44 310 observation and feedback). We hypothesized, for example, that to improve HH compliance an  
45  
46 311 infection control nurse working half-time would be sufficient. However, this assumption was  
47  
48  
49 312 based on expert opinion; we performed a sensitivity analysis to explore the uncertainty of the  
50  
51 313 required time dedicated to the HH programme and its expected effects.

52  
53 314 Screening strategies have been used to prevent transmission of MDROs, however, in a sensitivity  
54  
55  
56 315 analysis, we showed that improvement of HH to 80%/80% was always more effective than  
57  
58  
59  
60

1  
2  
3 316 screening and contact precautions and mostly less expensive than the screening and cohorting  
4  
5  
6 317 intervention. However, we can hypothesize that in the case of highly resistant bacteria (e.g.  
7  
8 318 Carbapenem-resistant *Enterobacteriaceae*) where there is a highest clinical impact on the  
9  
10 319 outcomes of infected patients, given the lack of therapeutic options, a rapid identification and  
11  
12 320 cohorting of carriers may be more beneficial from the hospital but also societal perspective.

13  
14  
15 321 Antibiotic use is the major driver for the selection of antibiotic-resistant bacteria<sup>39</sup> and many  
16  
17 322 strategies have been proposed to reduce the use of antibiotics in hospitals<sup>40</sup>. These strategies  
18  
19 323 could be implemented and associated with different efficacies and costs<sup>41</sup>. Here, we considered  
20  
21 324 that antibiotic stewardship, based on the introduction of an infectious disease specialist to the  
22  
23 325 ward, led to a 50% reduction in antibiotic use<sup>42</sup>. However, despite this optimistic scenario, we  
24  
25 326 found that antibiotic stewardship was less effective than HH or a screening and cohorting  
26  
27 327 strategy.

28  
29  
30  
31  
32 328 Under the hypotheses used in our model, we also demonstrated in a previous study through  
33  
34 329 sensitivity analyses that antibiotic parameters did not significantly influence the effectiveness of  
35  
36 330 interventions<sup>12</sup>.

37  
38  
39  
40 331 However, adding antibiotic stewardship to an HH strategy slightly improved its effectiveness and  
41  
42 332 may be worthy of consideration if the decision-makers are willing to pay at least €49 055 per  
43  
44 333 infection avoided (we calculated that it would be equivalent to €5 562 per life-year gained  
45  
46 334 (LYG)). Combining antibiotic stewardship with screening and cohorting was even more effective  
47  
48 335 than combining HH and antibiotic stewardship, but with an additional cost of €61 994 per  
49  
50 336 infection avoided (or €7 030/LYG).

51  
52  
53  
54  
55 337

1  
2  
3 338 Our study has several strengths. Firstly, we used a dynamic model to represent interactions  
4  
5 339 between patients and HCWs and to take into account that the risk of colonization in the ICU  
6  
7 340 depends on the number of ESBL carriers and could change over time. Moreover, our model  
8  
9 341 incorporated the key elements of ESBL-PE transmission, such as the impact of prevalence at  
10  
11 342 admission or antibiotic treatment. Secondly, we used input parameters derived from recent  
12  
13 343 multicentre studies. Thirdly, we estimated the cost of HCW according to the time they spend  
14  
15 344 working on the programme based on the best evidence from the literature and expert opinion.  
16  
17 345 Finally, we assessed the impact of uncertainty in parameter estimation and the impact of model  
18  
19 346 assumptions on the model's predictions by performing multiple sensitivity analyses.  
20  
21  
22  
23

24 347 Our study also has several limitations. ICU parameters and costs were based mostly on French  
25  
26 348 data, and ESBL-PE infections, prevalence, compliance with control measures and costs may be  
27  
28 349 different in other countries.  
29  
30

31 350 A recent multicentre cohort study<sup>17</sup> found no difference in LOS between infected and colonised  
32  
33 351 patients. Thus, in order to simplify assumptions, the “infected” state was not included to the  
34  
35 352 model. However, infected patients are potentially more contaminating HCW hands,  
36  
37 353 disseminating the organism in the environment and increase the transmissibility<sup>43</sup>. Thus,  
38  
39 354 consequently we may have underestimated the number of acquisitions in the ICU and the impact  
40  
41 355 of control measures.  
42  
43  
44

45 356 The epidemiologic characteristics of ESBL-PE are complex and may vary, depending on ESBL-  
46  
47 357 PE species. For example, Thiébaud et al.<sup>44</sup> showed that *E.coli* ESBL was mainly imported (66%)  
48  
49 358 and *K. Pneumoniae* ESBL was acquired (77%). Furthermore, the differential capacity of cross-  
50  
51 359 transmission between ESBL *E. coli* and other *Enterobacteriaceae* has been clearly established<sup>45</sup>.  
52

53 360 In a previous publication from our group<sup>12</sup>, however, we showed no difference in the  
54  
55 361 effectiveness of control measures, whatever the *Enterobacteriaceae* considered, either *E. coli* or  
56  
57  
58  
59  
60

1  
2  
3 362 another *Enterobacteriaceae*. We therefore decided to consider *Enterobacteriaceae* globally, a  
4  
5 363 situation that can be extended to carbapenemase-producing *Enterobacteriaceae*.  
6  
7

8 364

9  
10 365 We modelled an ICU as a single-room unit where transmission among patients results via  
11  
12 366 contacts with HCWs. In the absence of detailed information on transmission of ESBL-PE in  
13  
14 367 hospital wards, we ignored direct HCW-to-HCW transmissions as well as environmental  
15  
16 368 contamination or excreta management.  
17  
18

19  
20 369

21  
22 370 ESBL-PE acquisition in the ICU can lead to transmission from an ICU-acquired case and  
23  
24 371 infection in downstream units, thus increasing costs of hospitalization. Moreover, colonization  
25  
26 372 with ESBL-PE may persist several months after hospital discharge<sup>46</sup>, therefore increasing the risk  
27  
28 373 of infection with potential subsequent treatment failure. Thus, an efficient intervention to prevent  
29  
30 374 the inhospital cross-transmission may also have an impact on the prevention of post-discharge  
31  
32 375 infections and the need for readmissions.  
33  
34

35  
36 376 Our cost evaluation therefore underestimated health benefits and cost savings resulting from  
37  
38 377 inhospital interventions to control ESBL-PE, but participate to demonstrate the usefulness of  
39  
40 378 inhospital intervention to prevent further costs.  
41  
42

43  
44 379

## 45 46 380 **CONCLUSION**

47  
48  
49 381 Our study suggests that a universal approach with improved compliance with HH was the most  
50  
51 382 cost-saving strategy to prevent the transmission of ESBL-PE in an ICU setting. Screening and  
52  
53 383 cohorting of carriers had comparable effectiveness to HH improvement, but was more expensive.  
54  
55  
56  
57  
58  
59  
60

1  
2  
3 384 Antibiotic stewardship was not cost-effective in comparison with other options. However, adding  
4  
5 385 antibiotic restriction to the HH or the screening and cohorting strategies slightly improved their  
6  
7  
8 386 effectiveness and may be worthy of consideration by decision-makers.  
9  
10 387

## 11 12 13 388 **ACKNOWLEDGMENTS**

14  
15  
16 389 We thank Dr. Laurence Armand for useful discussion on our study.  
17  
18  
19 390

## 20 21 391 **FOOTNOTES**

22  
23  
24 392 **Contributors:** YY, JCL, CP and LKS designed the study. YY, JCL, PYB, AA, CP and LKS  
25  
26 393 contributed to the development of the model. CP, AP, GB, ER and LKS collected the data. CP  
27  
28 394 and LKS wrote the code. LKS conducted computer simulations and result analysis. LKS, JCL  
29  
30  
31 395 and YY drafted the manuscript. All authors read and critically revised the manuscript.

32  
33 396 **Funding:** This work was supported by the French government (PREPS program [grant number  
34  
35  
36 397 13-0693]) and by the National Institute for Health and Medical Research (INSERM).

37  
38 398 **Competing interests:** None declared.  
39  
40

41 399 **Data sharing statement:** Details of the computer code for the model are available from the  
42  
43 400 corresponding author.  
44  
45  
46 401

## 47 48 49 402 **REFERENCES**

50  
51  
52 403 1 European Centre for Disease Prevention and Control (ECDC). SURVEILLANCE REPORT: Antimicrobial  
53  
54 404 resistance surveillance in Europe 2014.  
55  
56  
57  
58  
59  
60



- 1  
2  
3 405 <http://ecdc.europa.eu/en/publications/publications/antimicrobial-resistance-europe-2014.pdf>  
4  
5 406 (accessed Sept 30, 2016).  
6  
7  
8  
9 407 2 Centers for Disease Control and Prevention (CDC). Antibiotic Resistance Patient Safety Atlas. Summary  
10  
11 408 of Results. <http://gis.cdc.gov/grasp/PSA/Downloads/ARPatientSafetyAtlas-SummaryofResults.pdf>  
12  
13 409 (accessed Sept 30, 2016).  
14  
15  
16  
17 410 3 Sidjabat HE, Paterson DL. Multidrug-resistant *Escherichia coli* in Asia: epidemiology and management.  
18  
19 411 *Expert Rev Anti Infect Ther* 2015; **13**: 575–91.  
20  
21  
22 412 4 Tansarli GS, Poulidakos P, Kapaskelis A, Falagas ME. Proportion of extended-spectrum  $\beta$ -lactamase  
23  
24 413 (ESBL)-producing isolates among Enterobacteriaceae in Africa: evaluation of the evidence--systematic  
25  
26 414 review. *J Antimicrob Chemother* 2014; **69**: 1177–84.  
27  
28  
29  
30 415 5 Paterson DL, Bonomo RA. Extended-spectrum beta-lactamases: a clinical update. *Clin Microbiol Rev*  
31  
32 416 2005; **18**: 657–86.  
33  
34  
35  
36 417 6 World Health Organization. Evidence of hand hygiene to reduce transmission and infections by multi-  
37  
38 418 drug resistant organisms in health-care settings. [http://www.who.int/gpsc/5may/MDRO\\_literature-](http://www.who.int/gpsc/5may/MDRO_literature-review.pdf)  
39  
40 419 [review.pdf](http://www.who.int/gpsc/5may/MDRO_literature-review.pdf) (accessed Sept 7, 2016).  
41  
42  
43  
44 420 7 Gandra S, Barter DM, Laxminarayan R. Economic burden of antibiotic resistance: how much do we  
45  
46 421 really know? *Clin Microbiol Infect Off Publ Eur Soc Clin Microbiol Infect Dis* 2014; **20**: 973–80.  
47  
48  
49 422 8 Septimus E, Weinstein RA, Perl TM, Goldmann DA, Yokoe DS. Approaches for preventing healthcare-  
50  
51 423 associated infections: go long or go wide? *Infect Control Hosp Epidemiol* 2014; **35 Suppl 2**: S10-14.  
52  
53  
54  
55  
56  
57  
58  
59  
60

- 1  
2  
3 424 9 Derde LPG, Cooper BS, Goossens H, *et al.* Interventions to reduce colonisation and transmission of  
4  
5 425 antimicrobial-resistant bacteria in intensive care units: an interrupted time series study and cluster  
6  
7 426 randomised trial. *Lancet Infect Dis* 2014; **14**: 31–9.
- 8  
9  
10  
11 427 10 Goto M, O’Shea AMJ, Livorsi DJ, *et al.* The Effect of a Nationwide Infection Control Program Expansion  
12  
13 428 on Hospital-Onset Gram-Negative Rod Bacteremia in 130 Veterans Health Administration Medical  
14  
15 429 Centers: An Interrupted Time-Series Analysis. *Clin Infect Dis Off Publ Infect Dis Soc Am* 2016; **63**: 642–  
16  
17 430 50.
- 18  
19  
20  
21 431 11 Otter JA, Muters NT, Tacconelli E, Gikas A, Holmes AH. Controversies in guidelines for the control of  
22  
23 432 multidrug-resistant Gram-negative bacteria in EU countries. *Clin Microbiol Infect Off Publ Eur Soc Clin*  
24  
25 433 *Microbiol Infect Dis* 2015; **21**: 1057–66.
- 26  
27  
28  
29 434 12 Pelat C, Kardaś-Słoma L, Birgand G, *et al.* Hand Hygiene, Cohorting, or Antibiotic Restriction to Control  
30  
31 435 Outbreaks of Multidrug-Resistant Enterobacteriaceae. *Infect Control Hosp Epidemiol* 2016; **37**: 272–  
32  
33 436 80.
- 34  
35  
36  
37 437 13 R Core Team. R: The R Project for Statistical Computing. <https://www.r-project.org/> (accessed Sept  
38  
39 438 15, 2016).
- 40  
41  
42  
43 439 14 Venier AG, Zaro-Goni D, Pefau M, *et al.* Performance of hand hygiene in 214 healthcare facilities in  
44  
45 440 South-Western France. *J Hosp Infect* 2009; **71**: 280–2.
- 46  
47  
48  
49 441 15 REA-Raisin network. Surveillance des infections nosocomiales en réanimation adulte / 2012 /  
50  
51 442 Maladies infectieuses / Rapports et synthèses / Publications et outils / Accueil.  
52  
53 443 <http://invs.santepubliquefrance.fr/Publications-et-outils/Rapports-et-syntheses/Maladies->  
54  
55 444 [infectieuses/2012/Surveillance-des-infections-nosocomiales-en-reanimation-adulte](http://invs.santepubliquefrance.fr/Publications-et-outils/Rapports-et-syntheses/Maladies-) (accessed Sept  
56  
57 445 15, 2016).
- 58  
59  
60

- 1  
2  
3 446 16 Razazi K, Derde LPG, Verachten M, Legrand P, Lesprit P, Brun-Buisson C. Clinical impact and risk  
4  
5 447 factors for colonization with extended-spectrum  $\beta$ -lactamase-producing bacteria in the intensive care  
6  
7 448 unit. *Intensive Care Med* 2012; **38**: 1769–78.
- 9  
10  
11 449 17 Barbier F, Pommier C, Essaïed W, *et al.* Colonization and infection with extended-spectrum  $\beta$ -  
12  
13 450 lactamase-producing Enterobacteriaceae in ICU patients: what impact on outcomes and carbapenem  
14  
15 451 exposure? *J Antimicrob Chemother* 2016; **71**: 1088–97.
- 17  
18  
19 452 18 Viau R, Frank KM, Jacobs MR, *et al.* Intestinal Carriage of Carbapenemase-Producing Organisms:  
20  
21 453 Current Status of Surveillance Methods. *Clin Microbiol Rev* 2016; **29**: 1–27.
- 23  
24  
25 454 19 Vasudevan A, Memon BI, Mukhopadhyay A, Li J, Tambyah PA. The costs of nosocomial resistant gram  
26  
27 455 negative intensive care unit infections among patients with the systemic inflammatory response  
28  
29 456 syndrome- a propensity matched case control study. *Antimicrob Resist Infect Control* 2015; **4**: 3.
- 31  
32  
33 457 20 Briggs A, Claxton K, Sculpher M. Decision modelling for health economic evaluation. Oxford University  
34  
35 458 Press, 2006 <https://www.york.ac.uk/che/publications/books/decision-modelling/> (accessed Sept 6,  
36  
37 459 2016).
- 38  
39  
40 460 21 Cantor SB, Ganiats TG. Incremental cost-effectiveness analysis: the optimal strategy depends on the  
41  
42 461 strategy set. *J Clin Epidemiol* 1999; **52**: 517–22.
- 44  
45  
46 462 22 Climo MW, Yokoe DS, Warren DK, *et al.* Effect of daily chlorhexidine bathing on hospital-acquired  
47  
48 463 infection. *N Engl J Med* 2013; **368**: 533–42.
- 50  
51  
52 464 23 Huang SS, Septimus E, Kleinman K, *et al.* Targeted versus universal decolonization to prevent ICU  
53  
54 465 infection. *N Engl J Med* 2013; **368**: 2255–65.

- 1  
2  
3 466 24 Doan TN, Kong DCM, Kirkpatrick CMJ, McBryde ES. Optimizing hospital infection control: the role of  
4  
5 467 mathematical modeling. *Infect Control Hosp Epidemiol* 2014; **35**: 1521–30.  
6  
7  
8  
9 468 25 Grundmann H, Hellriegel B. Mathematical modelling: a tool for hospital infection control. *Lancet*  
10  
11 469 *Infect Dis* 2006; **6**: 39–45.  
12  
13  
14 470 26 Chaix C, Durand-Zaleski I, Alberti C, Brun-Buisson C. Control of endemic methicillin-resistant  
15  
16 471 *Staphylococcus aureus*: a cost-benefit analysis in an intensive care unit. *JAMA* 1999; **282**: 1745–51.  
17  
18  
19  
20 472 27 Roberts RR, Hota B, Ahmad I, *et al*. Hospital and societal costs of antimicrobial-resistant infections in a  
21  
22 473 Chicago teaching hospital: implications for antibiotic stewardship. *Clin Infect Dis Off Publ Infect Dis Soc*  
23  
24 474 *Am* 2009; **49**: 1175–84.  
25  
26  
27  
28 475 28 Mauldin PD, Salgado CD, Hansen IS, Durup DT, Bosso JA. Attributable hospital cost and length of stay  
29  
30 476 associated with health care-associated infections caused by antibiotic-resistant gram-negative  
31  
32 477 bacteria. *Antimicrob Agents Chemother* 2010; **54**: 109–15.  
33  
34  
35  
36 478 29 Lee SY, Kotapati S, Kuti JL, Nightingale CH, Nicolau DP. Impact of extended-spectrum beta-lactamase-  
37  
38 479 producing *Escherichia coli* and *Klebsiella* species on clinical outcomes and hospital costs: a matched  
39  
40 480 cohort study. *Infect Control Hosp Epidemiol* 2006; **27**: 1226–32.  
41  
42  
43  
44 481 30 Robotham JV, Graves N, Cookson BD, *et al*. Screening, isolation, and decolonisation strategies in the  
45  
46 482 control of methicillin resistant *Staphylococcus aureus* in intensive care units: cost effectiveness  
47  
48 483 evaluation. *BMJ* 2011; **343**: d5694.  
49  
50  
51  
52 484 31 Gidengil CA, Gay C, Huang SS, Platt R, Yokoe D, Lee GM. Cost-effectiveness of strategies to prevent  
53  
54 485 methicillin-resistant *Staphylococcus aureus* transmission and infection in an intensive care unit. *Infect*  
55  
56 486 *Control Hosp Epidemiol* 2015; **36**: 17–27.  
57  
58  
59  
60

- 1  
2  
3 487 32 Huttner B, Hausteiner T, Uçkay I, *et al.* Decolonization of intestinal carriage of extended-spectrum  $\beta$ -  
4  
5 488 lactamase-producing Enterobacteriaceae with oral colistin and neomycin: a randomized, double-blind,  
6  
7 489 placebo-controlled trial. *J Antimicrob Chemother* 2013; **68**: 2375–82.
- 8  
9  
10  
11 490 33 Halaby T, Al Naiemi N, Kluytmans J, van der Palen J, Vandenbroucke-Grauls CMJE. Emergence of  
12  
13 491 colistin resistance in Enterobacteriaceae after the introduction of selective digestive tract  
14  
15 492 decontamination in an intensive care unit. *Antimicrob Agents Chemother* 2013; **57**: 3224–9.
- 16  
17  
18  
19 493 34 World Health Organization. WHO Guidelines on Hand Hygiene in Health Care. 2009.  
20  
21 494 [http://apps.who.int/iris/bitstream/10665/44102/1/9789241597906\\_eng.pdf](http://apps.who.int/iris/bitstream/10665/44102/1/9789241597906_eng.pdf) (accessed Sept 6, 2016).
- 22  
23  
24  
25 495 35 Scheithauer S, Haefner H, Schwanz T, *et al.* Compliance with hand hygiene on surgical, medical, and  
26  
27 496 neurologic intensive care units: direct observation versus calculated disinfectant usage. *Am J Infect*  
28  
29 497 *Control* 2009; **37**: 835–41.
- 30  
31  
32  
33 498 36 Cepeda JA, Whitehouse T, Cooper B, *et al.* Isolation of patients in single rooms or cohorts to reduce  
34  
35 499 spread of MRSA in intensive-care units: prospective two-centre study. *Lancet Lond Engl* 2005; **365**:  
36  
37 500 295–304.
- 38  
39  
40  
41 501 37 Pittet D, Hugonnet S, Harbarth S, *et al.* Effectiveness of a hospital-wide programme to improve  
42  
43 502 compliance with hand hygiene. Infection Control Programme. *Lancet Lond Engl* 2000; **356**: 1307–12.
- 44  
45  
46  
47 503 38 Luangsanatip N, Hongsuwan M, Limmathurotsakul D, *et al.* Comparative efficacy of interventions to  
48  
49 504 promote hand hygiene in hospital: systematic review and network meta-analysis. *BMJ* 2015; **351**:  
50  
51 505 h3728.
- 52  
53  
54  
55 506 39 Holmes AH, Moore LSP, Sundsfjord A, *et al.* Understanding the mechanisms and drivers of  
56  
57 507 antimicrobial resistance. *The Lancet* 2016; **387**: 176–87.

- 1  
2  
3 508 40 Davey P, Brown E, Charani E, *et al.* Interventions to improve antibiotic prescribing practices for  
4  
5 509 hospital inpatients. *Cochrane Database Syst Rev* 2013; : CD003543.  
6  
7  
8  
9 510 41 de Jong E, van Oers JA, Beishuizen A, *et al.* Efficacy and safety of procalcitonin guidance in reducing  
10  
11 511 the duration of antibiotic treatment in critically ill patients: a randomised, controlled, open-label trial.  
12  
13 512 *Lancet Infect Dis* 2016; **16**: 819–27.  
14  
15  
16  
17 513 42 Roger P-M, Farhad R, Pulcini C, *et al.* [Elderly patients presenting with fever and respiratory problems  
18  
19 514 in an intensive care unit. Diagnostic, therapeutic and prognostic impact of a systematic infectious  
20  
21 515 disease consultation]. *Presse Medicale Paris Fr* 1983 2003; **32**: 1699–704.  
22  
23  
24  
25 516 43 Ruppé E, Lixandru B, Cojocar R, *et al.* Relative fecal abundance of extended-spectrum- $\beta$ -lactamase-  
26  
27 517 producing *Escherichia coli* strains and their occurrence in urinary tract infections in women.  
28  
29 518 *Antimicrob Agents Chemother* 2013; **57**: 4512–7.  
30  
31  
32  
33 519 44 Thiébaud ACM, Arlet G, Andremont A, *et al.* Variability of intestinal colonization with third-generation  
34  
35 520 cephalosporin-resistant Enterobacteriaceae and antibiotic use in intensive care units. *J Antimicrob*  
36  
37 521 *Chemother* 2012; **67**: 1525–36.  
38  
39  
40  
41 522 45 Tschudin-Sutter S, Lucet J-C, Mutters NT, Tacconelli E, Zahar JR, Harbarth S. Contact precautions for  
42  
43 523 preventing nosocomial transmission of ESBL-producing *Escherichia coli* - a point/counterpoint review.  
44  
45 524 *Clin Infect Dis Off Publ Infect Dis Soc Am* 2017; published online April 3. DOI:10.1093/cid/cix258.  
46  
47  
48  
49 525 46 Birgand G, Armand-Lefevre L, Lolom I, Ruppe E, Andremont A, Lucet J-C. Duration of colonization by  
50  
51 526 extended-spectrum  $\beta$ -lactamase-producing Enterobacteriaceae after hospital discharge. *Am J Infect*  
52  
53 527 *Control* 2013; **41**: 443–7.  
54  
55  
56  
57  
58  
59  
60

1  
2  
3 528 47 Girard R, Aupee M, Erb M, Bettinger A, Jouve A. Hand rub dose needed for a single disinfection varies  
4  
5 529 according to product: a bias in benchmarking using indirect hand hygiene indicator. *J Epidemiol Glob*  
6  
7  
8 530 *Health* 2012; **2**: 193–8.

9  
10  
11 531 48 Kaier K. Economic implications of the dynamic relationship between antibiotic use and hospital-  
12  
13 532 acquired infections. *Value Health J Int Soc Pharmacoeconomics Outcomes Res* 2012; **15**: 87–93.

14  
15  
16  
17 533 49 Armand L. Place des nouvelles techniques dans l'optimisation diagnostique et thérapeutique des  
18  
19 534 infections nosocomiales en réanimation. [http://clin-sudest.chu-](http://clin-sudest.chu-lyon.fr/Reseaux/REA/Journee/2014/6_Bacterio_NouveauxOutils.pdf)  
20  
21 535 [lyon.fr/Reseaux/REA/Journee/2014/6\\_Bacterio\\_NouveauxOutils.pdf](http://clin-sudest.chu-lyon.fr/Reseaux/REA/Journee/2014/6_Bacterio_NouveauxOutils.pdf) (accessed Sept 6, 2016).

22  
23  
24  
25 536 50 Birgand G, Ruimy R, Schwarzinger M, *et al.* Rapid detection of glycopeptide-resistant enterococci:  
26  
27 537 impact on decision-making and costs. *Antimicrob Resist Infect Control* 2013; **2**: 30.

28  
29  
30 538  
31  
32  
33  
34  
35  
36  
37  
38  
39  
40  
41  
42  
43  
44  
45  
46  
47  
48  
49  
50  
51  
52  
53  
54  
55  
56  
57  
58  
59  
60

1  
2  
3 539 **FIGURE LEGENDS**  
4

5 540 **Figure 1.** Model of transmission of ESBL-PE between patients through contacts with health-care  
6  
7  
8 541 workers (HCWs) and impact of infection control measures in the transmission process. Solid  
9  
10 542 lines represent the transitions between population groups and dashed lines represent the  
11  
12 543 transmission between patients and HCWs.

13  
14  
15 544**A.** Impact of universal (horizontal) control measures: 1) hand hygiene (reduces the transmission  
16  
17 545 among patients and HCWs); 2) antibiotic restriction (reduces the risk of transmission from  
18  
19 546 colonized patients receiving antibiotics to HCWs or from contaminated HCWs to uncolonized  
20  
21 547 patients receiving antibiotics).  
22  
23

24 548  
25  
26  
27 549**B.** Impact of targeted (vertical) control measures: screening of patients on ICU admission and  
28  
29 550 identification of patients who had positive screening results (patients surrounded by a shaded  
30  
31 551 box). Implementation of: 1) contact precautions (hand hygiene reduces the transmission from  
32  
33 552 identified ESBL-PE carriers to HCWs); 2) cohorting of identified ESBL-PE carriers and  
34  
35 553 attribution of a dedicated HCW (prevents the transmission from cohorted patients to other HCWs  
36  
37 554 and patients). Note that we included two categories of colonized patients: 1) who had false  
38  
39 555 negative admission screening results; 2) who had positive admission screening results (patients  
40  
41 556 surrounded by a shaded box).  
42  
43  
44

45 557  
46  
47  
48 558 **Figure 2.** Patient outcomes after one year under the different control strategies tested. (A) New  
49  
50 559 acquisitions (transmissions) of ESBL-PE per 100 admissions, (B) Total number of ESBL-PE  
51  
52 560 infections per 100 admissions in patients who: 1) acquired colonization in the ICU, and 2) those  
53  
54 561 who were already colonized at ICU admission.  
55  
56  
57  
58  
59  
60



1  
2  
3 562 Strategies are: (1) Base case (reference strategy with no control intervention and hand hygiene  
4  
5 563 compliance of 55%/60% before/after patient contact); (2) Hand hygiene improvement to  
6  
7  
8 564 80%/80%; (3) Hand hygiene improvement to 55%/80%; (4) Antibiotic reduction; (5) Screening  
9  
10 565 of all admissions and contact precautions for identified carriers; (6) Screening of all admissions  
11  
12 566 and cohorting of identified carriers; (7) Hand hygiene improvement to 80%/80% and antibiotic  
13  
14 567 reduction; (8) Hand hygiene improvement to 55%/80% and antibiotic reduction; (9) Screening of  
15  
16 568 all admissions, contact precautions with identified carriers and antibiotic reduction; (10)  
17  
18 569 Screening of all admissions, cohorting of identified carriers and antibiotic reduction.  
19  
20  
21  
22 570  
23

24 571 **Figure 3.** Cost-effectiveness plane showing the incremental health benefits (infections avoided)  
25  
26 572 and costs relative to the least expensive strategy (Strategy 2). Strategies 1, 3, 4, 5, 8, 9 are  
27  
28 573 dominated as they have both a worse outcome and a higher cost. The efficiency frontier (grey  
29  
30 574 line), joins Strategy 2 with more expensive and more efficient strategies (7 and 10). Strategy 6 is  
31  
32 575 extended to this frontier and excluded by the principle of extended dominance. The slope of the  
33  
34 576 efficiency frontier represents the incremental cost-effectiveness.  
35  
36  
37

38 577 Strategies are: (1) Base case (reference strategy with no control intervention and hand hygiene  
39  
40 578 compliance of 55%/60% before/after patient contact); (2) Hand hygiene improvement to  
41  
42 579 80%/80%; (3) Hand hygiene improvement to 55%/80%; (4) Antibiotic reduction; (5) Screening  
43  
44 580 of all admissions and contact precautions with identified carriers; (6) Screening of all admissions  
45  
46 581 and cohorting of identified carriers; (7) Hand hygiene improvement to 80%/80% and antibiotic  
47  
48 582 reduction; (8) Hand hygiene improvement to 55%/80% and antibiotic reduction; (9) Screening of  
49  
50 583 all admissions, contact precautions with identified carriers and antibiotic reduction; (10)  
51  
52 584 Screening of all admissions, cohorting of identified carriers and antibiotic reduction.  
53  
54  
55  
56  
57  
58 585  
59  
60

586 **TABLES**587 **Table 1.** Cost parameters, their sources and ranges for sensitivity analyses.

588 Costs of control strategies were based on material and personnel. For example, the cost of the HH  
 589 improvement strategy included the cost of HH (hand-rub and HCWs' time) and the cost of an  
 590 infection control nurse working on the programme, i.e. HH education, observation and feedback.

591

|                                                                                              | <u>Resource</u>                                              | <u>Cost (€<sup>*</sup>)</u> |           | <u>Source</u>      | <u>Distribution</u> |
|----------------------------------------------------------------------------------------------|--------------------------------------------------------------|-----------------------------|-----------|--------------------|---------------------|
|                                                                                              |                                                              | <u>mean</u>                 | <u>SD</u> |                    |                     |
|                                                                                              | ICU bed-day                                                  | 1,583                       | 226       | AP-HP <sup>a</sup> | Gamma               |
| <u>Universal strategies</u>                                                                  |                                                              |                             |           |                    |                     |
| Hand hygiene                                                                                 | Alcohol-based hand rub                                       | 0.011                       | 0.0055    | 47,48              | Gamma               |
|                                                                                              | HCW's time per hand hygiene                                  | 0.143                       | 0.0714    | 47                 | Gamma               |
|                                                                                              | Infection control nurse at half-time/month <sup>b</sup>      | 2,048 <sup>c</sup>          | 164       | AP-HP <sup>a</sup> | Gamma               |
| Antibiotic stewardship                                                                       | Infectious disease physician at half-time/month <sup>b</sup> | 5,500 <sup>c</sup>          | 273       | AP-HP <sup>a</sup> | Gamma               |
| <u>Targeted strategies</u>                                                                   |                                                              |                             |           |                    |                     |
| Screening                                                                                    | Screening test + laboratory costs                            | 40                          | 20        | 48–50              | Gamma               |
| Contact precautions<br>(= hand hygiene at<br>80%/80% with<br>identified ESBL-PE<br>patients) | Alcohol-based hand rub                                       | 0.011                       | 0.0055    | 47,48              | Gamma               |
|                                                                                              | HCW's time per hand hygiene                                  | 0.143                       | 0.0714    | 47                 | Gamma               |

1  
2  
3  
4  
5  
6  
7  
8  
9  
10  
11  
12  
13  
14  
15  
16  
17  
18  
19  
20  
21  
22  
23  
24  
25  
26  
27  
28  
29  
30  
31  
32  
33  
34  
35  
36  
37  
38  
39  
40  
41  
42  
43  
44  
45  
46  
47  
48  
49  
50  
51  
52  
53  
54  
55  
56  
57  
58  
59  
60

|                                                        |                                             |                    |        |                    |       |
|--------------------------------------------------------|---------------------------------------------|--------------------|--------|--------------------|-------|
| Cohorting<br>(additional HCW +<br>contact precautions) | Additional full-time HCW/month <sup>b</sup> | 3,598 <sup>c</sup> | 642    | AP-HP <sup>a</sup> | Gamma |
|                                                        | Alcohol-based hand rub                      | 0.011              | 0.0055 | 47,48              | Gamma |
|                                                        | HCW's time per hand hygiene                 | 0.143              | 0.0714 | 47                 | Gamma |

592 <sup>a</sup> AP-HP: The Assistance Publique – Hôpitaux de Paris

593 <sup>b</sup> Assumption based on expert opinion

594 <sup>c</sup> Cost of staff from a hospital perspective (salary + employer contributions)

595 \* 1€ = US \$0.94

596

597

598

599 **Table 2.** Results of cost-effectiveness analysis.

| Strategy                                  | Number of ICU admissions | Total cost/100 admissions (€) | Cost of infections/100 admissions (€) | Cost of intervention/100 admissions (€) | of Infections due to ESBL-PE/100 admissions | Incremental cost/100 admissions (€) | Incremental effect (infections avoided/100 admissions) | Incremental (ΔE)    | ICER (ΔC/ΔE) (€ / infection avoided) |
|-------------------------------------------|--------------------------|-------------------------------|---------------------------------------|-----------------------------------------|---------------------------------------------|-------------------------------------|--------------------------------------------------------|---------------------|--------------------------------------|
| 2: HH 80%/80%                             | 573                      | 80 556                        | 54 916                                | 25 639                                  | 2.9                                         | -                                   | -                                                      | -                   | -                                    |
| 7: HH 80%/80% + ATB reduction             | 581                      | 88 498                        | 51 840                                | 36 657                                  | 2.7                                         | 7 942 <sup>a</sup>                  | 0.1619 <sup>a</sup>                                    | 49 055 <sup>a</sup> |                                      |
| 10: Screening + cohorting + ATB reduction | 584                      | 94 313                        | 50 058                                | 44 255                                  | 2.6                                         | 5 815 <sup>b</sup>                  | 0.0938 <sup>b</sup>                                    | 61 994 <sup>b</sup> |                                      |
| 3: HH 55%/80%                             | 548                      | 84 751                        | 66 773                                | 17 978                                  | 3.5                                         |                                     |                                                        |                     | Dominated <sup>c</sup>               |
| 6: Screening + cohorting                  | 575                      | 86 713                        | 53 278                                | 33 435                                  | 2.8                                         |                                     |                                                        |                     | Dominated <sup>d</sup>               |
| 8: HH 55%/80% + ATB reduction             | 565                      | 88 621                        | 59 445                                | 29 176                                  | 3.1                                         |                                     |                                                        |                     | Dominated <sup>c</sup>               |

1  
2  
3  
4  
5  
6  
7  
8  
9  
10  
11  
12  
13  
14  
15  
16  
17  
18  
19  
20  
21  
22  
23  
24  
25  
26  
27  
28  
29  
30  
31  
32  
33  
34  
35  
36  
37  
38  
39  
40  
41  
42  
43  
44  
45  
46  
47  
48  
49

|                                    |     |         |        |        |     |  |                        |
|------------------------------------|-----|---------|--------|--------|-----|--|------------------------|
| 9: Screening + contact precautions |     |         |        |        |     |  |                        |
| + ATB reduction                    | 546 | 94 309  | 67 560 | 26 749 | 3.6 |  | Dominated <sup>c</sup> |
| 5: Screening + contact precautions | 519 | 96 716  | 81 582 | 15 134 | 4.3 |  | Dominated <sup>c</sup> |
| 4: ATB reduction                   | 528 | 100 128 | 77 641 | 22 486 | 4.1 |  | Dominated <sup>c</sup> |
| 1: <b>Base case</b>                | 498 | 105 344 | 94 792 | 10 552 | 5.0 |  | Dominated <sup>c</sup> |

600 <sup>a</sup> Relative to strategy 2

601 <sup>b</sup> Relative to strategy 7

602 <sup>c</sup> Dominated: A strategy is dominated when it has higher cost and lower health benefit than another strategy.

603 <sup>d</sup> Dominated by extended dominance: Strategy is dominated by extended dominance if the linear combination of other strategies produces

604 greater benefit at lower cost.

1  
2  
3  
4  
5  
6  
7  
8  
9  
10  
11  
12  
13  
14  
15  
16  
17  
18  
19  
20  
21  
22  
23  
24  
25  
26  
27  
28  
29  
30  
31  
32  
33  
34  
35  
36  
37  
38  
39  
40  
41  
42  
43  
44  
45  
46  
47  
48  
49  
50  
51  
52  
53  
54  
55  
56  
57  
58  
59  
60

For peer review only

Figure 1A

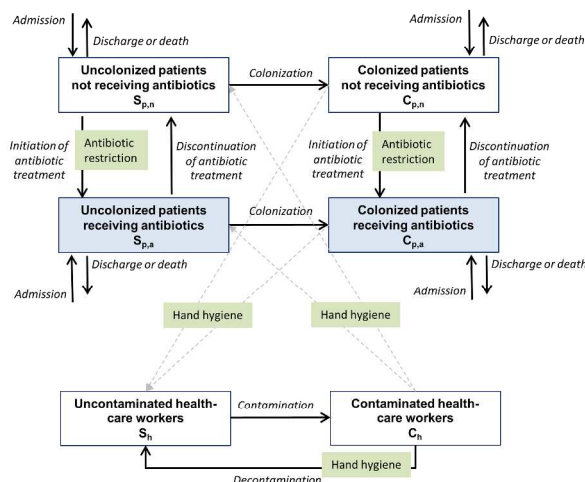

Figure 1B

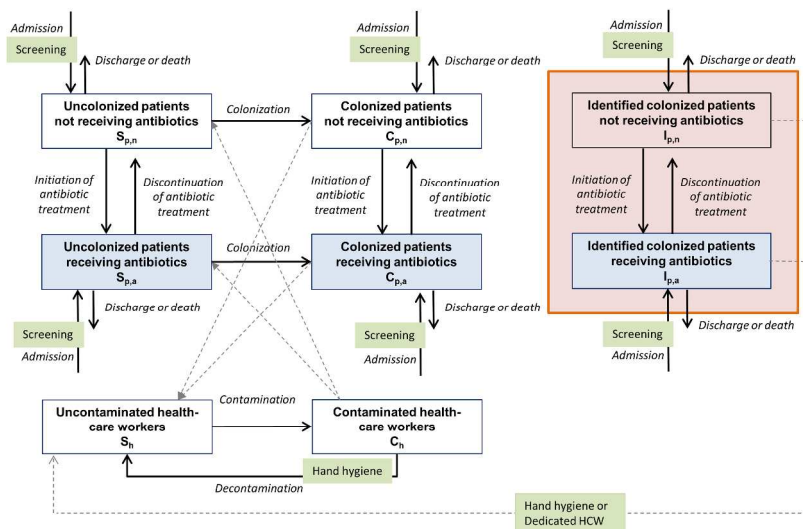

Figure 1. Model of transmission of ESBL-PE between patients through contacts with health-care workers (HCWs) and impact of infection control measures in the transmission process. Solid lines represent the transitions between population groups and dashed lines represent the transmission between patients and HCWs.

A. Impact of universal (horizontal) control measures: 1) hand hygiene (reduces the transmission among patients and HCWs); 2) antibiotic restriction (reduces the risk of transmission from colonized patients receiving antibiotics to HCWs or from contaminated HCWs to uncolonized patients receiving antibiotics).

B. Impact of targeted (vertical) control measures: screening of patients on ICU admission and identification of patients who had positive screening results (patients surrounded by a shaded box). Implementation of: 1) contact precautions (hand hygiene reduces the transmission from identified ESBL-PE carriers to HCWs); 2) cohorting of identified ESBL-PE carriers and attribution of a dedicated HCW (prevents the transmission from cohorting patients to other HCWs and patients). Note that we included two categories of colonized patients:

1  
2  
3 1) who had false negative admission screening results; 2) who had positive admission screening results  
4 (patients surrounded by a shaded box).  
5  
6

7 250x338mm (300 x 300 DPI)  
8  
9  
10  
11  
12  
13  
14  
15  
16  
17  
18  
19  
20  
21  
22  
23  
24  
25  
26  
27  
28  
29  
30  
31  
32  
33  
34  
35  
36  
37  
38  
39  
40  
41  
42  
43  
44  
45  
46  
47  
48  
49  
50  
51  
52  
53  
54  
55  
56  
57  
58  
59  
60



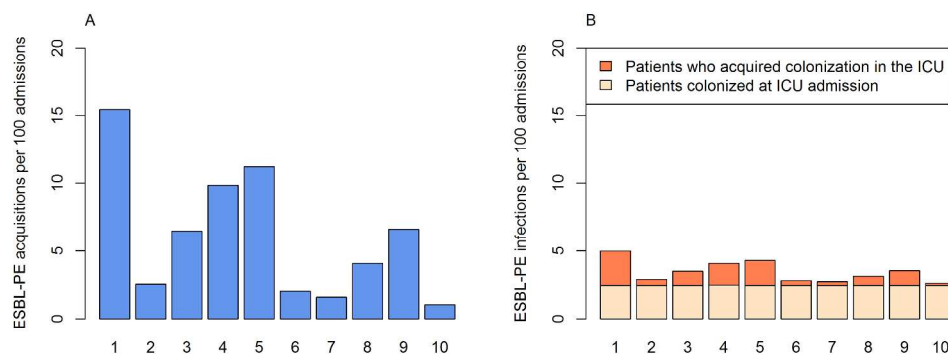

Figure 2. Patient outcomes after one year under the different control strategies tested. (A) New acquisitions (transmissions) of ESBL-PE per 100 admissions, (B) Total number of ESBL-PE infections per 100 admissions in patients who: 1) acquired colonization in the ICU, and 2) those who were already colonized at ICU admission.

Strategies are: (1) Base case (reference strategy with no control intervention and hand hygiene compliance of 55%/60% before/after patient contact); (2) Hand hygiene improvement to 80%/80%; (3) Hand hygiene improvement to 55%/80%; (4) Antibiotic reduction; (5) Screening of all admissions and contact precautions for identified carriers; (6) Screening of all admissions and cohorting of identified carriers; (7) Hand hygiene improvement to 80%/80% and antibiotic reduction; (8) Hand hygiene improvement to 55%/80% and antibiotic reduction; (9) Screening of all admissions, contact precautions with identified carriers and antibiotic reduction; (10) Screening of all admissions, cohorting of identified carriers and antibiotic reduction.

269x119mm (300 x 300 DPI)

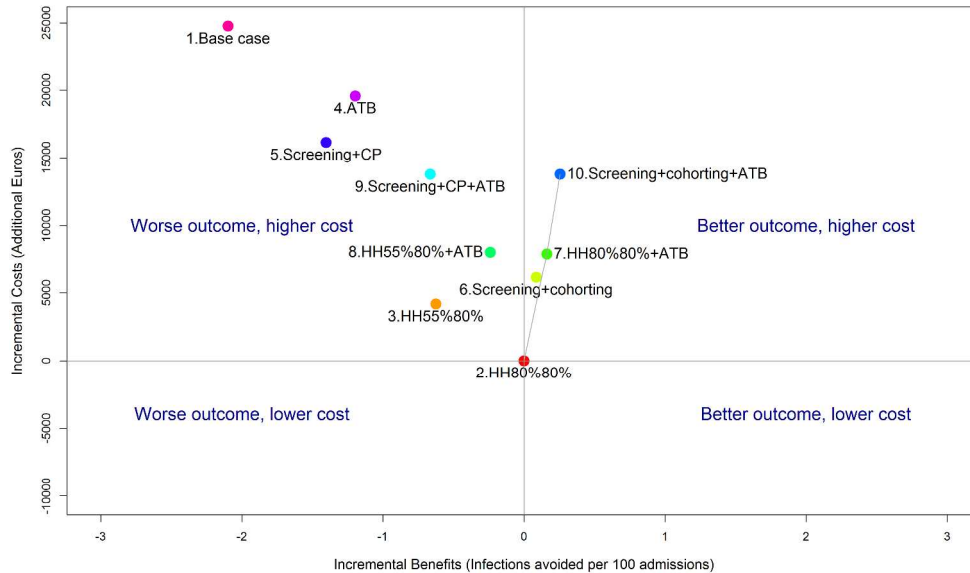

Figure 3. Cost-effectiveness plane showing the incremental health benefits (infections avoided) and costs relative to the least expensive strategy (Strategy 2). Strategies 1, 3, 4, 5, 8, 9 are dominated as they have both a worse outcome and a higher cost. The efficiency frontier (grey line), joins Strategy 2 with more expensive and more efficient strategies (7 and 10). Strategy 6 is extended to this frontier and excluded by the principle of extended dominance. The slope of the efficiency frontier represents the incremental cost-effectiveness.

Strategies are: (1) Base case (reference strategy with no control intervention and hand hygiene compliance of 55%/60% before/after patient contact); (2) Hand hygiene improvement to 80%/80%; (3) Hand hygiene improvement to 55%/80%; (4) Antibiotic reduction; (5) Screening of all admissions and contact precautions with identified carriers; (6) Screening of all admissions and cohorting of identified carriers; (7) Hand hygiene improvement to 80%/80% and antibiotic reduction; (8) Hand hygiene improvement to 55%/80% and antibiotic reduction; (9) Screening of all admissions, contact precautions with identified carriers and antibiotic reduction; (10) Screening of all admissions, cohorting of identified carriers and antibiotic reduction.

359x229mm (300 x 300 DPI)

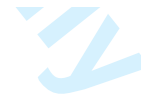

## Supplementary material

### Supplementary Text S1

| <b>Defining the objectives, scope and policy context of a model.</b> |                                                                                                                                                                                                      |
|----------------------------------------------------------------------|------------------------------------------------------------------------------------------------------------------------------------------------------------------------------------------------------|
| Decision objective                                                   | To evaluate ESBL-PE control strategies                                                                                                                                                               |
| Policy context                                                       | This analysis was used to support decision makers in choosing the best strategy for controlling ESBL-PE                                                                                              |
| Funding source                                                       | PREPS Program*, Inserm**                                                                                                                                                                             |
| Disease                                                              | ESBL-PE infections                                                                                                                                                                                   |
| Perspective                                                          | Hospital perspective                                                                                                                                                                                 |
| Target population                                                    | ICU patients                                                                                                                                                                                         |
| Health benefits                                                      | Reduction in ESBL-PE infections                                                                                                                                                                      |
| Strategies                                                           | Universal strategies (hand hygiene improvement or antibiotic reduction)<br>Targeted strategies (screening of patients on ICU admission and contact precaution in contact with carriers or cohorting) |
| Resources/costs                                                      | Staff time working on the program, materials                                                                                                                                                         |
| Time horizon                                                         | 1 year                                                                                                                                                                                               |
| *PREPS - French government's program on Care System Performance      |                                                                                                                                                                                                      |
| **Inserm- National Institute for Health and Medical Research         |                                                                                                                                                                                                      |

## Transmission model

We have used an extended version of a previously developed compartmental, dynamic, stochastic model to simulate the transmission of ESBL-PE in a hypothetical ICU with 10 single-bed rooms among patients through contacts with healthcare workers (HCWs)<sup>1</sup>.

For each simulation, we introduced a single unidentified ESBL-PE carrier receiving antibiotics within the ward and simulated the ESBL-PE dynamics for one year. In this version of the model, following the first admitted colonized patient,  $\phi$  was the fraction of admitted patients assumed to be colonized with ESBL-PE. Patients are discharged at rate  $\gamma$  or die at rate  $\nu$  but bed occupancy is assumed to be 100% (the population of patients in the ward is constant).

Patients may or may not receive antibiotics at admission; antibiotics are initiated during the patient's stay at rate  $\tau$  per day and antibiotics are discontinued at rate  $\theta$  per day.

In the model, all patients were classified as 1) uncolonized receiving antibiotics ( $S_{p,a}$ ) or not ( $S_{p,n}$ ), 2) unidentified ESBL-PE carriers receiving antibiotics ( $C_{p,a}$ ) or not ( $C_{p,n}$ ) (**Figure 1A**).

Antibiotics in the model acted in two ways: 1) increased the risk of becoming colonized for uncolonized patients receiving antibiotics; and 2) increased the risk of transmission from colonized patients receiving antibiotics.

Initially uncontaminated HCWs ( $S_h$ ) can become transiently contaminated (and go to the compartment  $C_h$ ) after contact with a colonized patient ( $C_{p,n}$  or  $C_{p,a}$ ).

### Mathematical model under targeted infection control measures

The model was modified to account for the effect of targeted control measures. To detect ESBL-PE carriers, we simulated the screening of patients at ICU admission. We assumed that the screening method had 95% sensitivity and 100% specificity. Thus in the model, all patients were classified as 1) uncolonized receiving antibiotics ( $S_{p,a}$ ) or not ( $S_{p,n}$ ), 2) unidentified ESBL-PE carriers receiving antibiotics ( $C_{p,a}$ ) or not ( $C_{p,n}$ ), and 3) identified ESBL-PE carriers receiving antibiotics ( $I_{p,a}$ ) or not ( $I_{p,n}$ ) (**Figure 1B**).

### Model parameters

Exposure to antibiotics has been associated with increased probability of colonization for uncolonized patients<sup>2,3</sup> and of transmission from colonized patients to HCWs<sup>4-6</sup>. Thus, we hypothesized that: 1) the colonization probability after contact with a contaminated HCW was higher in patients on antibiotics than in untreated patients ( $b_{p,a} > b_{p,n}$ ), 2) the probability of contamination of an HCW through contact with a colonized patient was higher if the patient was treated with antibiotics ( $b_{h,a} > b_{h,n}$ ).

The transmission parameter  $\beta$  depends on the rate of HCW visits followed by contacts with the patient ( $a$ ), the probability of ESBL-PE bacteria transmission per infectious contact ( $b_{..}$ ), and the compliance with hand hygiene (HH) ( $p_p$  and  $p_h$ ).

The risk of transmission from an unidentified ESBL-PE carrier to n HCW might differ from that of an identified ESBL-PE carrier, because of the implementation of targeted control measures.

1  
2  
3 Firstly, we modelled the implementation of contact precautions (improvement of HH) in contacts  
4  
5 with identified ESBL-PE carriers. HH for other patients was maintained at baseline level.  
6  
7

8 The transmission parameters were defined as follows:  
9

10  
11  $\beta_{p,a} = a \cdot b_{p,a} \cdot (1 - p_p)$   
12 } Transmission from contaminated HCWs to  
13  $\beta_{p,n} = a \cdot b_{p,n} \cdot (1 - p_p)$  } uncolonized patients (receiving antibiotics or not)  
14  
15  
16  
17  $\beta_{h,a} = a \cdot b_{h,a} \cdot (1 - p_h)$   
18 } Transmission from non-identified, colonized  
19  $\beta_{h,n} = a \cdot b_{h,n} \cdot (1 - p_h)$  } patients (receiving antibiotics or not) to HCWs  
20  
21  
22  
23  $\beta_{h,a,I} = a \cdot b_{h,a,I} \cdot (1 - p_{h,Is})$   
24 } Transmission from identified, colonized  
25  $\beta_{h,n,I} = a \cdot b_{h,n,I} \cdot (1 - p_{h,Is})$  } patients (receiving antibiotics or not) to HCWs  
26  
27  
28

29 Secondly, we modelled the introduction of a dedicated HCW to interact only with identified,  
30  
31 colonized patients. The transmission parameters were defined as follows:  
32  
33  
34  
35

36  
37  $\beta_{p,a} = a \cdot b_{p,a} \cdot (1 - p_p)$   
38 } Transmission from contaminated HCWs to  
39  $\beta_{p,n} = a \cdot b_{p,n} \cdot (1 - p_p)$  } uncolonized patients (receiving antibiotics or not)  
40  
41  
42  $\beta_{h,a} = a \cdot b_{h,a} \cdot (1 - p_h)$   
43 } Transmission from non-identified, colonized  
44  $\beta_{h,n} = a \cdot b_{h,n} \cdot (1 - p_h)$  } patients (receiving antibiotics or not) to HCWs  
45  
46  
47  
48  $\beta_{h,a,I} = 0$   
49 } Transmission from identified, colonized  
50  $\beta_{h,n,I} = 0$  } patients (receiving antibiotics or not) to HCWs  
51 (other than the dedicated HCW)  
52  
53  
54  
55  
56  
57  
58  
59  
60

1  
2  
3 Once colonized, patients do not clear ESBL-PE colonization before discharge. HCWs are  
4  
5 transiently contaminated and they become decontaminated either by performing HH or after a  
6  
7 mean waiting time of one hour.  
8  
9

10  
11 The model parameters and their values are presented in **Supplementary Table 1**. Parameter  
12  
13 values were derived from multicentre studies if available, and by default based on best evidence  
14  
15 from the literature or expert opinion.  
16  
17

18 We modelled an ICU with 10 single-rooms with continuous presence of 6 HCWs<sup>8</sup>. We assumed  
19  
20 100% bed occupancy. Consequently, a shorter length of stay (LOS) implies a higher turnover and  
21  
22 possible admission of colonized patients<sup>9</sup>. As reported recently, the ICU LOS of ESBL-PE  
23  
24 carriers is longer (13 days) than uncolonized patients (5 days)<sup>10</sup>. The extended LOS in ESBL-PE  
25  
26 carriers increases the colonization pressure in the ICU, consequently increasing the risk of cross-  
27  
28 transmission.  
29  
30

31  
32 When targeted control strategies were used, colonization was detected using a screening method  
33  
34 assuming that screening results were instantaneous. We assumed that the sensitivity of the  
35  
36 screening method was 95%<sup>11</sup>. Screening results had 100% specificity.  
37  
38  
39  
40  
41

### 42 **Costs of control strategies**

43  
44  
45 We estimated the costs of control strategies over the one-year simulation period. See **Table 1** for  
46  
47 details on cost parameters.  
48  
49

50 We used gamma distribution to represent uncertainty in cost parameters. Cost data are  
51  
52 constrained to be non-negative and gamma distribution is often used in decision modelling. To  
53  
54 estimate the parameters of the gamma distribution to cost data, we used the method of moments.  
55  
56

57 When data were available from the hospital data base, e.g. cost of ICU bed-day, we performed a  
58  
59  
60

1  
2  
3  
4  
5  
6  
7  
8  
9  
10  
11  
12  
13  
14  
15  
16  
17  
18  
19  
20  
21  
22  
23  
24  
25  
26  
27  
28  
29  
30  
31  
32  
33  
34  
35  
36  
37  
38  
39  
40  
41  
42  
43  
44  
45  
46  
47  
48  
49  
50  
51  
52  
53  
54  
55  
56  
57  
58  
59  
60

goodness of fit test (Kolmogorov-Smirnov) to assure that a random sample comes from a gamma distribution. The test was performed using **R** software.

The cost of the base case strategy (reference strategy) was considered to be the cost of HH at baseline level, namely cost of the alcohol-based hand rub and costs associated with the time HCWs required for hand disinfection.

As reported recently, the highest cost of an HH program arose from the time people spent working on the program<sup>12</sup>. We therefore assumed that the cost of an HH improvement strategy included the cost of HH (hand-rub and HCWs' time) and the cost of an infection control nurse working on the program, i.e. HH education, observation and feedback<sup>12,13</sup>. We assumed (based on expert opinion) that improving hand HH compliance to 55/80% and to 80/80% required respectively a quarter and a half of the working time of an infection control nurse. In accordance with staffing practices common in the European Union, we assumed that one staff position requires the recruitment of three nurses<sup>14</sup>.

Antibiotic stewardship programs (ASPs) have proven efficient in reducing antibiotic use and antibiotic duration in hospitals<sup>15-17</sup>. Interventions included in ASPs require additional resources associated with higher costs<sup>18</sup>. One of the resources needed and associated with the highest costs is the staff time<sup>19</sup>. We calculated the cost of an action to reduce antibiotic use as the cost of a half-time infectious disease physician working on the ASP. This assumption was based on expert opinion. The cost of antibiotics is considered to be marginal and was not considered in our study<sup>17</sup>.



1  
2  
3 The cost of screening was first based on the cost of testing materials and on the cost of laboratory  
4 technician time spend on a rapid screening test (e.g. PCR).  
5  
6

7  
8 For the strategy in which screening at admission was combined with contact precautions for  
9 identified ESBL-PE carriers, we also included the cost of contact precautions such as the cost of  
10 improved HH (i.e. the cost of the alcohol-based hand rub), and the costs associated with the time  
11 HCWs required for hand disinfection. Here we did not consider the cost of an infection control  
12 nurse. We hypothesized that knowing that the patient is an ESBL-PE carrier, HCWs would  
13 adhere more easily to HH.  
14  
15

16  
17 For the strategy in which screening on admission was combined with cohorting of identified  
18 ESBL-PE patients, the cost of cohorting was the cost of contact precautions and the cost of  
19 additional HCWs caring for cohorted patients (based on expert opinion). For screening  
20 interventions, the cost of HH in non-carriers and unidentified carriers was considered to be  
21 identical to the costs of the baseline level.  
22  
23  
24  
25  
26  
27  
28  
29  
30  
31  
32  
33  
34  
35  
36

### 37 **Cost of hospital-acquired infections**

38  
39 The mean cost of an ICU bed-day was estimated at €1,583 (based on the average amount paid in  
40 2015 for ICUs in Paris public hospitals (AP-HP). This amount is based on French Diagnosis-  
41 Related Groups and complementary revenues specific to ICU units and divided by the mean  
42 length of stay in ICUs in 2015<sup>20</sup>. Based on published reports, the cost per day of a patient with  
43 ESBL-PE infection was 50% higher than the cost of an uninfected patient<sup>21,22</sup>. The cost of an  
44 ESBL-PE infection was estimated using the ESBL-PE-attributable LOS and the cost of a hospital  
45 bed-day for infected patients<sup>23,24</sup>.  
46  
47  
48  
49  
50  
51  
52  
53  
54  
55  
56  
57  
58  
59  
60

### Model calibration

The model was simulated stochastically. We calibrated the colonization and contamination parameters using Monte Carlo methods in order to reproduce the observed 12.9% acquisition rate in an ICU after a 6-month period<sup>7</sup>.

### Model simulations and outcomes

Simulations of the model were performed using Gillespie's method and programmed in C++ language. The outcomes were calculated after a period of 1 year and averaged over the 1,000 Monte Carlo simulations. Cost-effectiveness analysis and graphics were performed in R<sup>25</sup>.

## TABLES

**Supplementary Table 1.** Base case values and ranges for probabilistic sensitivity analysis of input parameters used in the compartmental model of ESBL-PE transmission.

**Comment.** As can be seen, for some parameters the ranges for a sensitivity analysis are omitted (e.g.  $d_{ATB,S}$ ). This is because these parameters are specific to a strategy (e.g. Atb reduction) and must be fixed in sensitivity analysis to allow the comparison of outcomes with other strategies.

| Parameter | Description                                                                   | Value | Source           | Sensitivity analysis                            |                         |
|-----------|-------------------------------------------------------------------------------|-------|------------------|-------------------------------------------------|-------------------------|
|           |                                                                               |       |                  | Range                                           | Distribution            |
| $N_p$     | Number of beds                                                                | 10    | <sup>26</sup>    |                                                 |                         |
| $N_h$     | Number of HCWs                                                                | 6     | <sup>27</sup>    |                                                 |                         |
| $C_p$     | Number of HCW visits associated with at least one aseptic contact per patient | 81    | <sup>28-30</sup> | 13.8 <sup>31</sup> -<br>160 <sup>28,32,33</sup> | triangular (peak at 81) |

|           |                                                                                                                         |        |                                                    |                    |                             |
|-----------|-------------------------------------------------------------------------------------------------------------------------|--------|----------------------------------------------------|--------------------|-----------------------------|
|           | per day                                                                                                                 |        |                                                    |                    |                             |
| a         | Number of HCW visits associated with at least one aseptic contact per HCW per day                                       | 13.5   | $c_p/N_h$                                          |                    |                             |
| $b_{p,n}$ | Colonization probability for patients not receiving antibiotics                                                         | 0.0127 | Calibrated, consistent with data from <sup>7</sup> | 0-0.1              | triangular (peak at 0.0127) |
| $b_{p,a}$ | Colonization probability for patients receiving antibiotics                                                             | 0.0530 |                                                    | $b_{p,n}-0.5$      | uniform                     |
| $b_{h,n}$ | Probability of contamination of an HCW with ESBL-PE during a contact with a colonized patient not receiving antibiotics | 0.0379 | Calibrated, consistent with data from <sup>7</sup> | 0-0.6              | triangular (peak at 0.0379) |
| $b_{h,a}$ | Probability of contamination of an HCW during a contact with a colonized patient receiving antibiotics                  | 0.3198 | Calibrated, consistent with data from <sup>7</sup> | $b_{h,n}-0.8$      | uniform                     |
| $d_s$     | Mean length of stay of uncolonized patients (days)                                                                      | 5      | <sup>10</sup>                                      | 3-9 <sup>10</sup>  | triangular (peak at 5)      |
| $d_c$     | Mean length of stay of colonized patients (days)                                                                        | 13     | <sup>10</sup>                                      | 6-26 <sup>10</sup> | triangular (peak at 13)     |
|           |                                                                                                                         |        |                                                    |                    |                             |

|             |                                                                        |        |                  |                    |                             |
|-------------|------------------------------------------------------------------------|--------|------------------|--------------------|-----------------------------|
| $d_{Is}$    | Mean length of stay of isolated patients (days)                        | 13     | <sup>10</sup>    | 6-26 <sup>10</sup> | triangular (peak at 13)     |
| $\gamma_s$  | Discharge rate of uncolonized patients (/day)                          | 0.2    | $1/d_s$          |                    |                             |
| $\gamma_c$  | Discharge rate of colonized patients (/day)                            | 0.0154 | $1/d_c$          |                    |                             |
| $\nu$       | Death rate of patients (/day)                                          | 0.0027 | <sup>10</sup>    | 0.00135-0.0054     | triangular (peak at 0.0027) |
| $\mu_0$     | Natural decontamination rate for HCW (i.e. not by hand hygiene) (/day) | 24     | <sup>31,34</sup> | 12-48              | triangular (peak at 24)     |
| $\psi$      | Prevalence of antibiotic therapy among admitted patients               | 0.56   | <sup>35,36</sup> | 0.2-0.9            | triangular (peak at 0.56)   |
| $\tau$      | Antibiotic initiation rate (/day)                                      | 0.1    | assumed          | 0.05-0.2           | triangular (peak at 0.1)    |
| $d_{ATB,S}$ | Antibiotic therapy duration for uncolonized patients (days)            | 8      | <sup>36</sup>    |                    |                             |
| $d_{ATB,C}$ | Antibiotic therapy duration                                            | 18     | <sup>36</sup>    |                    |                             |

|            |                                                                                                 |         |               |          |                           |
|------------|-------------------------------------------------------------------------------------------------|---------|---------------|----------|---------------------------|
|            | for colonized patients (days)                                                                   |         |               |          |                           |
| $\theta_s$ | Antibiotic therapy discontinuation rate for uncolonized patients (/day)                         | 0.125   | $1/dATB_s$    |          |                           |
| $\theta_c$ | Antibiotic therapy discontinuation rate for colonized patients (/day)                           | 0.05556 | $1/dATB_c$    |          |                           |
| $p_p$      | Probability of hand hygiene before contact with patient (uncolonized or colonized unidentified) | 0.55    | <sup>37</sup> |          |                           |
| $p_h$      | Probability of hand hygiene after contact with patient(uncolonized or colonized unidentified)   | 0.6     | <sup>37</sup> |          |                           |
| $p_{pls}$  | Probability of hand hygiene before contact with isolated patient                                | 0.8     | assumed       |          |                           |
| $p_{hls}$  | Probability of hand hygiene after contact with isolated patient                                 | 0.8     | assumed       |          |                           |
| $\varphi$  | Prevalence of ESBL-PE carriage among admitted patients                                          | 0.15    | <sup>23</sup> | 0.07-0.3 | triangular (peak at 0.15) |

|       |                                                 |       |               |            |                            |
|-------|-------------------------------------------------|-------|---------------|------------|----------------------------|
| $p_i$ | Probability of infection in colonized patient   | 0.164 | <sup>10</sup> | 0.08- 0.32 | triangular (peak at 0.164) |
| $d_i$ | Mean length of stay of infected patients (days) | 13    | <sup>10</sup> | 6-29 [12]  | triangular (peak at 13)    |
| $s_b$ | Sensitivity of the screening method (%)         | 95    | <sup>11</sup> |            |                            |
| $s_p$ | Specificity of the screening method (%)         | 100   | assumed       |            |                            |

## REFERENCES

- 1 Pelat C, Kardaś-Słoma L, Birgand G, *et al.* Hand Hygiene, Cohorting, or Antibiotic Restriction to Control Outbreaks of Multidrug-Resistant Enterobacteriaceae. *Infect Control Hosp Epidemiol* 2016; **37**: 272–80.
- 2 Nicolas-Chanoine M-H, Jarlier V, Robert J, *et al.* Patient's origin and lifestyle associated with CTX-M-producing Escherichia coli: a case-control-control study. *PLoS One* 2012; **7**: e30498.
- 3 Colodner R, Rock W, Chazan B, *et al.* Risk factors for the development of extended-spectrum beta-lactamase-producing bacteria in nonhospitalized patients. *Eur J Clin Microbiol Infect Dis Off Publ Eur Soc Clin Microbiol* 2004; **23**: 163–7.
- 4 Ruppé E, Andremont A. Causes, consequences, and perspectives in the variations of intestinal density of colonization of multidrug-resistant enterobacteria. *Front Microbiol* 2013; **4**. DOI:10.3389/fmicb.2013.00129.
- 5 Lerner A, Adler A, Abu-Hanna J, Cohen Percia S, Kazma Matalon M, Carmeli Y. Spread of KPC-producing carbapenem-resistant Enterobacteriaceae: the importance of super-spreaders and rectal KPC concentration. *Clin Microbiol Infect Off Publ Eur Soc Clin Microbiol Infect Dis* 2015; **21**: 470.e1-7.
- 6 Pultz MJ, Donskey CJ. Effects of Imipenem-Cilastatin, Ertapenem, Piperacillin-Tazobactam, and Ceftriaxone Treatments on Persistence of Intestinal Colonization by Extended-Spectrum- $\beta$ -Lactamase-Producing *Klebsiella pneumoniae* Strains in Mice. *Antimicrob Agents Chemother* 2007; **51**: 3044–5.

- 1  
2  
3 7 Derde LPG, Cooper BS, Goossens H, *et al.* Interventions to reduce colonisation and transmission of  
4 antimicrobial-resistant bacteria in intensive care units: an interrupted time series study and cluster  
5 randomised trial. *Lancet Infect Dis* 2014; **14**: 31–9.  
6  
7  
8 8 French Ministry, of Health website. Décret n°2002-466 du 5 avril 2002 relatif aux conditions  
9 techniques de fonctionnement auxquelles doivent satisfaire les établissements de santé pour pratiquer  
10 les activités de réanimation, de soins intensifs et de surveillance continue et modifiant le code de la  
11 santé publique (troisième partie : Décrets simples). 2002.  
12  
13 9 Cooper BS, Medley GF, Scott GM. Preliminary analysis of the transmission dynamics of nosocomial  
14 infections: stochastic and management effects. *J Hosp Infect* 1999; **43**: 131–47.  
15  
16 10 Barbier F, Pommier C, Essaïed W, *et al.* Colonization and infection with extended-spectrum  $\beta$ -  
17 lactamase-producing Enterobacteriaceae in ICU patients: what impact on outcomes and carbapenem  
18 exposure? *J Antimicrob Chemother* 2016; **71**: 1088–97.  
19  
20 11 Chavada R, Maley M. Evaluation of a Commercial Multiplex PCR for Rapid Detection of Multi Drug  
21 Resistant Gram Negative Infections. *Open Microbiol J* 2015; **9**: 125–35.  
22  
23 12 Page K, Barnett AG, Campbell M, *et al.* Costing the Australian National Hand Hygiene Initiative. *J*  
24 *Hosp Infect* 2014; **88**: 141–8.  
25  
26 13 World Health Organization. WHO Guidelines on Hand Hygiene in Health Care. 2009.  
27 [http://apps.who.int/iris/bitstream/10665/44102/1/9789241597906\\_eng.pdf](http://apps.who.int/iris/bitstream/10665/44102/1/9789241597906_eng.pdf) (accessed Sept 6, 2016).  
28  
29 14 Ferrer J, Boelle P-Y, Salomon J, *et al.* Management of nurse shortage and its impact on pathogen  
30 dissemination in the intensive care unit. *Epidemics* 2014; **9**: 62–9.  
31  
32 15 Roger P-M, Farhad R, Pulcini C, *et al.* [Elderly patients presenting with fever and respiratory problems  
33 in an intensive care unit. Diagnostic, therapeutic and prognostic impact of a systematic infectious  
34 disease consultation]. *Presse Medicale Paris Fr* 1983 2003; **32**: 1699–704.  
35  
36 16 Davey P, Brown E, Charani E, *et al.* Interventions to improve antibiotic prescribing practices for  
37 hospital inpatients. *Cochrane Database Syst Rev* 2013; : CD003543.  
38  
39 17 Rimawi RH, Mazer MA, Siraj DS, Gooch M, Cook PP. Impact of regular collaboration between  
40 infectious diseases and critical care practitioners on antimicrobial utilization and patient outcome. *Crit*  
41 *Care Med* 2013; **41**: 2099–107.  
42  
43 18 Dik J-WH, Vemer P, Friedrich AW, *et al.* Financial evaluations of antibiotic stewardship programs-a  
44 systematic review. *Front Microbiol* 2015; **6**: 317.  
45  
46 19 Page K, Graves N, Halton K, Barnett AG. Humans, ‘things’ and space: costing hospital infection  
47 control interventions. *J Hosp Infect* 2013; **84**: 200–5.  
48  
49 20 Assistance publique – Hôpitaux de Paris (AP-HP). Base de données PMSI. 2015.  
50  
51 21 Vasudevan A, Memon BI, Mukhopadhyay A, Li J, Tambyah PA. The costs of nosocomial resistant  
52 gram negative intensive care unit infections among patients with the systemic inflammatory response  
53 syndrome- a propensity matched case control study. *Antimicrob Resist Infect Control* 2015; **4**: 3.  
54  
55  
56  
57  
58  
59  
60

- 1  
2  
3 22 MacVane SH, Tuttle LO, Nicolau DP. Impact of extended-spectrum  $\beta$ -lactamase-producing organisms  
4 on clinical and economic outcomes in patients with urinary tract infection. *J Hosp Med* 2014; **9**: 232–8.  
5  
6 23 Razazi K, Derde LPG, Verachten M, Legrand P, Lesprit P, Brun-Buisson C. Clinical impact and risk  
7 factors for colonization with extended-spectrum  $\beta$ -lactamase-producing bacteria in the intensive care  
8 unit. *Intensive Care Med* 2012; **38**: 1769–78.  
9  
10 24 Viau R, Frank KM, Jacobs MR, *et al.* Intestinal Carriage of Carbapenemase-Producing Organisms:  
11 Current Status of Surveillance Methods. *Clin Microbiol Rev* 2016; **29**: 1–27.  
12  
13 25 R Core Team. R: The R Project for Statistical Computing. <https://www.r-project.org/> (accessed Sept  
14 15, 2016).  
15  
16 26 The French Intensive Care Society. SRLF. <http://www.srlf.org/en/the-french-intensive-care-society/>  
17 (accessed Sept 15, 2016).  
18  
19 27 French Ministry, of Health website. Décret n° 2002-466 du 5 avril 2002 relatif aux conditions  
20 techniques de fonctionnement auxquelles doivent satisfaire les établissements de santé pour pratiquer  
21 les activités de réanimation, de soins intensifs et de surveillance continue et modifiant le code de la  
22 santé publique (troisième partie : Décrets simples). 2002.  
23  
24 28 Steed C, Kelly JW, Blackhurst D, *et al.* Hospital hand hygiene opportunities: where and when  
25 (HOW2)? The HOW2 Benchmark Study. *Am J Infect Control* 2011; **39**: 19–26.  
26  
27 29 Beggs CB, Noakes CJ, Shepherd SJ, Kerr KG, Sleigh PA, Banfield K. The influence of nurse cohorting  
28 on hand hygiene effectiveness. *Am J Infect Control* 2006; **34**: 621–6.  
29  
30 30 Guyot, J.M. Etude sur l'évaluation des pratiques dans le cadre de la lutte contre les infections  
31 nosocomiales sur les « frictions hydro-alcooliques par spécialités médico-chirurgicales ». Lot n°2 :  
32 Enquête sur le nombre d'opportunités d'hygiène des mains par spécialité médico-chirurgicale: 2008.  
33  
34 31 Austin DJ, Bonten MJ, Weinstein RA, Slaughter S, Anderson RM. Vancomycin-resistant enterococci  
35 in intensive-care hospital settings: transmission dynamics, persistence, and the impact of infection  
36 control programs. *Proc Natl Acad Sci U S A* 1999; **96**: 6908–13.  
37  
38 32 McArdle FI, Lee RJ, Gibb AP, Walsh TS. How much time is needed for hand hygiene in intensive  
39 care? A prospective trained observer study of rates of contact between healthcare workers and intensive  
40 care patients. *J Hosp Infect* 2006; **62**: 304–10.  
41  
42 33 Scheithauer S, Haefner H, Schwanz T, *et al.* Compliance with hand hygiene on surgical, medical, and  
43 neurologic intensive care units: direct observation versus calculated disinfectant usage. *Am J Infect  
44 Control* 2009; **37**: 835–41.  
45  
46 34 Sypsa V, Psychogiou M, Bouzala G-A, Hadjihannas L, Hatzakis A, Daikos GL. Transmission dynamics  
47 of carbapenemase-producing *Klebsiella pneumoniae* and anticipated impact of infection control  
48 strategies in a surgical unit. *PLoS One* 2012; **7**: e41068.  
49  
50 35 REA-Raisin network. Surveillance des infections nosocomiales en réanimation adulte / 2012 / Maladies  
51 infectieuses / Rapports et synthèses / Publications et outils / Accueil.  
52 [http://invs.santepubliquefrance.fr/Publications-et-outils/Rapports-et-syntheses/Maladies-  
53 infectieuses/2012/Surveillance-des-infections-nosocomiales-en-reanimation-adulte](http://invs.santepubliquefrance.fr/Publications-et-outils/Rapports-et-syntheses/Maladies-infectieuses/2012/Surveillance-des-infections-nosocomiales-en-reanimation-adulte) (accessed Sept 15,  
54 2016).  
55  
56  
57  
58  
59  
60



1  
2  
3 36 Robert J, Péan Y, Varon E, *et al.* Point prevalence survey of antibiotic use in French hospitals in 2009.  
4 *J Antimicrob Chemother* 2012; **67**: 1020–6.  
5

6 37 Venier AG, Zaro-Goni D, Pefau M, *et al.* Performance of hand hygiene in 214 healthcare facilities in  
7 South-Western France. *J Hosp Infect* 2009; **71**: 280–2.  
8  
9  
10  
11  
12  
13  
14  
15  
16  
17  
18  
19  
20  
21  
22  
23  
24  
25  
26  
27  
28  
29  
30  
31  
32  
33  
34  
35  
36  
37  
38  
39  
40  
41  
42  
43  
44  
45  
46  
47  
48  
49  
50  
51  
52  
53  
54  
55  
56  
57  
58  
59  
60

For peer review only

## Supplementary material

### Supplementary Text S2- Sensitivity analyses

#### 1. Impact of prevalence on admission on health outcomes and costs

The prevalence of ESBL-PE carriage on ICU admission highly influenced health outcomes and costs (**Supplementary Figure S1**) as well as the ranking of the strategies (**Supplementary Table S1**). However, improvement of HH to 80%/80% (Strategy 2) remained the most cost saving strategy, if the prevalence on admission was from 5% to 50%. If 50% of patients carried ESBL-PE on ICU admission, Strategy 2 was dominated by screening + cohorting (Strategy 6).

1  
2  
3  
4  
5  
6  
7  
8  
9  
10  
11  
12  
13  
14  
15  
16  
17  
18  
19  
20  
21  
22  
23  
24  
25  
26  
27  
28  
29  
30  
31  
32  
33  
34  
35  
36  
37  
38  
39  
40  
41  
42  
43  
44  
45  
46  
47

**Figure S1** Impact of prevalence on admission on the number of ESBL-PE infections and total cost of strategies for: (1) Base Case (reference strategy with no control intervention and hand hygiene compliance of 55%/60% before/after patient contact); (2) Hand hygiene improvement to 80%/80%; (6) Screening of all admissions and cohorting of identified carriers; (7) Hand hygiene improvement to 80%/80% and Antibiotic reduction; (10) Screening of all admissions, cohorting of identified carriers and Antibiotic reduction.

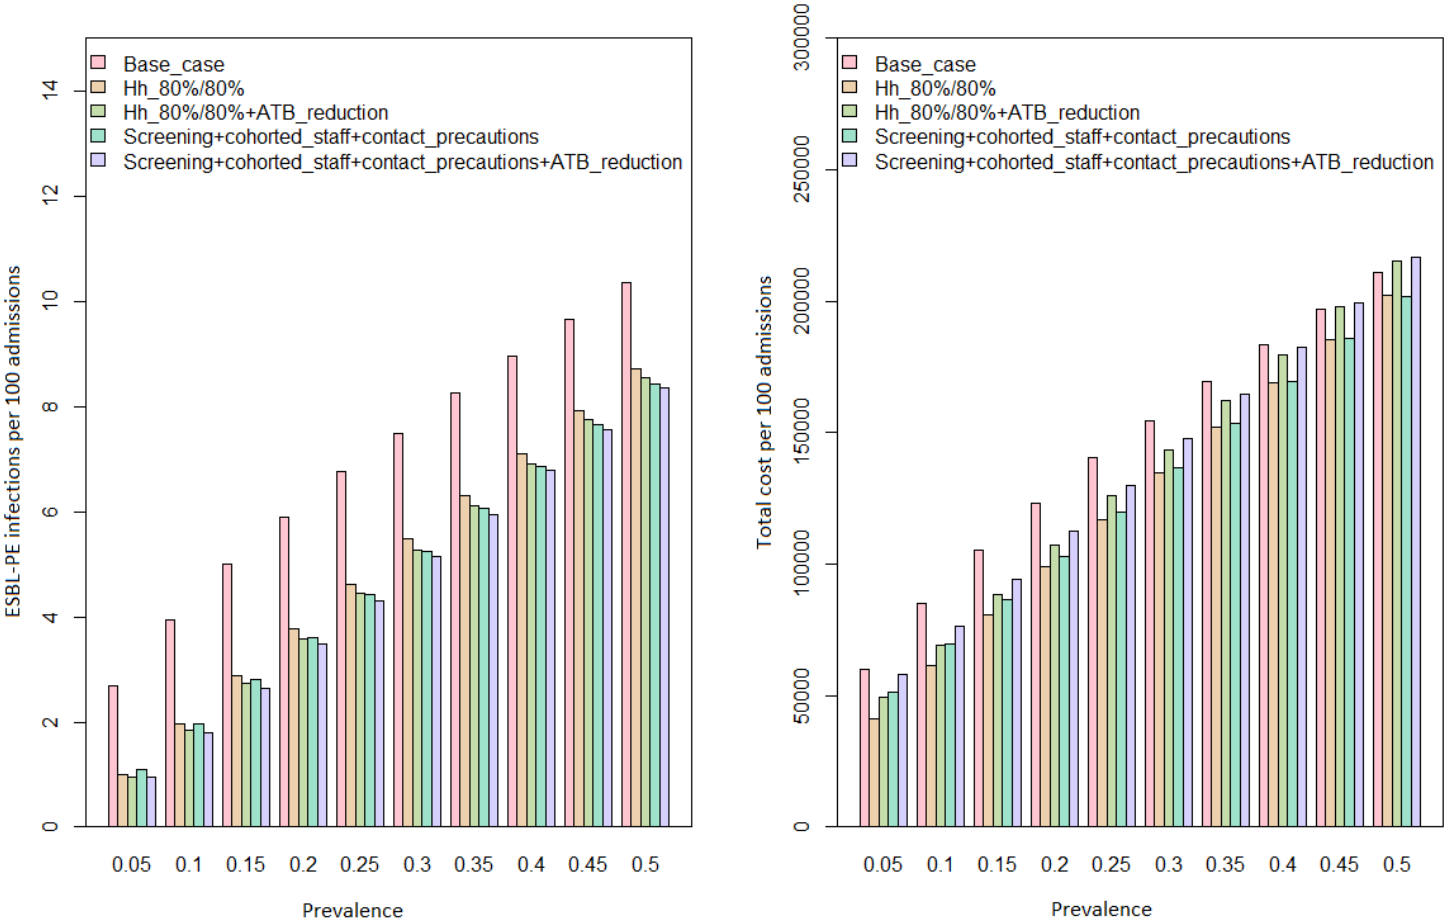

When the prevalence on admission was less than 15% the improvement of hand hygiene to 80%/80% (Strategy 2) was the most cost-saving strategy. The second strategy on the efficiency frontier was the combination of hand hygiene 80%/80% with antibiotic reduction (Strategy 7). When the prevalence was 15% the Strategy 10 (Screening + cohorting + ATB reduction) joined the efficiency frontier too. When the prevalence varied from 20% to 45%. Hand hygiene 80%/80% was always on the top of the ranking. followed by Screening + cohorting (Strategy 6) and Screening + cohorting + ATB reduction (Strategy 10). Finally, when 50% of patients carried ESBL-PE on ICU admission. hand hygiene was dominated by screening + cohorting (Strategy6).

**Supplementary Table S1.** Results of sensitivity analysis. Cost-effectiveness of strategies under **different levels of ESBL-PE carriage on admission**. The prevalence on admission varied from 0.05 to 0.5.

| Strategy                                  | Prevalence on admission | Total cost/ 100 admissions (€) | Infections/ 100 admissions | Incremental cost/100 admissions (ΔC) (€) | Incremental effect (ΔE) (infections avoided/100 admissions) | ICER (ΔC/ΔE) (€ / infection avoided) |
|-------------------------------------------|-------------------------|--------------------------------|----------------------------|------------------------------------------|-------------------------------------------------------------|--------------------------------------|
| <b>2: Hh 80%/80%</b>                      | 0.05                    | 41 225                         | 1.01                       |                                          |                                                             |                                      |
| 7: Hh 80%/80% + ATB reduction             |                         | 49 639                         | 0.94                       | 8 414                                    | 0.07                                                        | 120 200                              |
| 6: Screening + cohorting                  |                         | 51 542                         | 1.09                       |                                          |                                                             | Dominated                            |
| 10: Screening + cohorting + ATB reduction |                         | 58 218                         | 0.94                       |                                          |                                                             | Dominated by extended dominance      |
| 1: Base case                              |                         | 60 031                         | 2.68                       |                                          |                                                             | Dominated                            |
| <b>2: Hh 80%/80%</b>                      | 0.15                    | 80 556                         | 2.89                       |                                          |                                                             |                                      |
| 7: Hh 80%/80% + ATB reduction             |                         | 88 498                         | 2.73                       | 7 942                                    | 0.16                                                        | 49 638                               |
| 10: Screening + cohorting + ATB reduction |                         | 94 313                         | 2.63                       | 5 815                                    | 0.09                                                        | 64 611                               |
| 6: Screening + cohorting                  |                         | 86 713                         | 2.80                       |                                          |                                                             | Dominated by extended dominance      |
| 1: Base case                              |                         | 105 344                        | 4.99                       |                                          |                                                             | Dominated                            |

1  
2  
3  
4  
5  
6  
7  
8  
9  
10  
11  
12  
13  
14  
15  
16  
17  
18  
19  
20  
21  
22  
23  
24  
25  
26  
27  
28  
29  
30  
31  
32  
33  
34  
35  
36  
37  
38  
39  
40  
41  
42  
43  
44  
45  
46  
47

|                                           |     |         |       |        |      |                                 |
|-------------------------------------------|-----|---------|-------|--------|------|---------------------------------|
| <b>2: Hh 80%/80%</b>                      | 0.2 | 98 843  | 3.77  |        |      |                                 |
| 6: Screening + cohorting                  |     | 103 075 | 3.61  | 4 232  | 0.16 | 26 450                          |
| 10: Screening + cohorting + ATB reduction |     | 112 565 | 3.49  | 9 490  | 0.12 | 79 083                          |
| 7: Hh 80%/80% + ATB reduction             |     | 107 275 | 3.59  |        |      | Dominated by extended dominance |
| 1: Base case                              |     | 123 231 | 5.90  |        |      | Dominated                       |
| <b>6: Screening + cohorting</b>           | 0.5 | 201 668 | 8.43  |        |      |                                 |
| 10: Screening + cohorting + ATB reduction |     | 216 470 | 8.36  | 14 802 | 0.07 | 211 457                         |
| 2: Hh 80%/80%                             |     | 202 288 | 8.72  |        |      | Dominated                       |
| 1: Base case                              |     | 210 957 | 10.35 |        |      | Dominated                       |
| 7: Hh 80%/80% + ATB reduction             |     | 215 102 | 8.54  |        |      | Dominated                       |

2. Impact of **probability of infection** in patients colonized with ESBL-PE.

Results of sensitivity analysis for a lower and higher probability of infection in colonized ESBL-PE patients versus the basecase analysis are presented in **Supplementary Table S2 A and B**. Overall main results of our analysis were robust to variation in the probability of infection of colonized patients (8% or 30% vs. 16% in our central analysis).

**Supplementary Table S2A** Results of sensitivity analysis. Cost-effectiveness of strategies when **the probability of infection was set at 0.08**.

| Strategy                                           | Total cost/<br>100<br>admissions<br>(€) | Infections/<br>100<br>admissions | Incremental<br>cost/100<br>admissions<br>(ΔC) (€) | Incremental<br>effect (ΔE)<br>(infections<br>avoided/100<br>admissions) | ICER (ΔC/ΔE) (€ / infection avoided) |
|----------------------------------------------------|-----------------------------------------|----------------------------------|---------------------------------------------------|-------------------------------------------------------------------------|--------------------------------------|
| <b>3: Hh 55%/80%</b>                               | 50 550                                  | 1.71                             |                                                   |                                                                         |                                      |
| 2: Hh 80%/80%                                      | 52 428                                  | 1.41                             | 1 878                                             | 0.304                                                                   | 6 178                                |
| 7: Hh 80%/80% + ATB reduction                      | 61 945                                  | 1.33                             | 9 517                                             | 0.079                                                                   | 120 468                              |
| 10: Screening + cohorting + ATB reduction          | 68 673                                  | 1.29                             | 6 728                                             | 0.046                                                                   | 146 261                              |
| 5: Screening + contact precautions                 | 54 930                                  | 2.10                             |                                                   |                                                                         | Dominated                            |
| 1: Base case                                       | 56 792                                  | 2.43                             |                                                   |                                                                         | Dominated                            |
| 8: Hh 55%/80% + ATB reduction                      | 58 173                                  | 1.53                             |                                                   |                                                                         | Dominated by extended dominance      |
| 6: Screening + cohorting                           | 59 424                                  | 1.37                             |                                                   |                                                                         | Dominated by extended dominance      |
| 9: Screening + contact precautions + ATB reduction | 59 706                                  | 1.74                             |                                                   |                                                                         | Dominated                            |
| 4: ATB reduction                                   | 60 360                                  | 1.99                             |                                                   |                                                                         | Dominated                            |

**Supplementary Table S2B** Results of sensitivity analysis. Cost-effectiveness of strategies when **the probability of infection was set at 0.30**.

| Strategy                                           | Total cost/ 100 admissions (€) | Infections/ 100 admissions | Incremental cost/100 admissions (ΔC) (€) | Incremental effect (ΔE) (infections avoided/100 admissions) | ICER (ΔC/ΔE) (€ / infection avoided) |
|----------------------------------------------------|--------------------------------|----------------------------|------------------------------------------|-------------------------------------------------------------|--------------------------------------|
| <b>2: Hh 80%/80%</b>                               | 126 096                        | 5.29                       |                                          |                                                             |                                      |
| 7: Hh 80%/80% + ATB reduction                      | 131 487                        | 4.99                       | 5 391                                    | 0.300                                                       | 17 970                               |
| 10: Screening + cohorting + ATB reduction          | 135 825                        | 4.82                       | 4 338                                    | 0.170                                                       | 25 518                               |
| 6: Screening + cohorting                           | 130 896                        | 5.13                       |                                          |                                                             | Dominated by extended dominance      |
| 8: Hh 55%/80% + ATB reduction                      | 137 917                        | 5.72                       |                                          |                                                             | Dominated                            |
| 3: Hh 55%/80%                                      | 140 124                        | 6.43                       |                                          |                                                             | Dominated                            |
| 9: Screening + contact precautions + ATB reduction | 150 335                        | 6.50                       |                                          |                                                             | Dominated                            |
| 5: Screening + contact precautions                 | 164 370                        | 7.85                       |                                          |                                                             | Dominated                            |
| 4: ATB reduction                                   | 164 513                        | 7.48                       |                                          |                                                             | Dominated                            |
| 1: Base case                                       | 183 951                        | 9.13                       |                                          |                                                             | Dominated                            |

3. Impact of **lower compliance with HH** than in the base case scenario.

If the baseline compliance with HH was lower than in our core analysis. e.g. 20% before and 40% after patient contact. HH improvement. e.g. to 50%/60% was confirmed to be cost-saving. Screening + cohorting was the second strategy with an ICER of €3 236/infection avoided vs. HH improvement (**Supplementary Table S3A**).

**Supplementary Table S3A** Results of sensitivity analysis. Cost-effectiveness of strategies when the baseline compliance with **Hand hygiene was set to 20%/40% (instead of 55%/60%)**.

| Strategy                                           | Total cost/ 100 admissions (€) | Infections/ 100 admissions | Incremental cost/100 admissions (ΔC) (€) | Incremental effect (ΔE) (infections avoided/100 admissions) | ICER (ΔC/ΔE) (€ / infection avoided) |
|----------------------------------------------------|--------------------------------|----------------------------|------------------------------------------|-------------------------------------------------------------|--------------------------------------|
| 2: Hh 50%/60%                                      | 81 676                         | 3.14                       |                                          |                                                             |                                      |
| 6: Screening + cohorting                           | 82 867                         | 2.772                      | 1 191                                    | 0.368                                                       | 3 236                                |
| 10: Screening + cohorting + ATB reduction          | 91 134                         | 2.632                      | 8 267                                    | 0.14                                                        | 59 050                               |
| 3: Hh 20%/60%                                      | 85 059                         | 3.758                      |                                          |                                                             | Dominated                            |
| 8: Hh 20%/60% + ATB reduction                      | 87 440                         | 3.284                      |                                          |                                                             | Dominated                            |
| 7: Hh 50%/60% + ATB reduction                      | 88 144                         | 2.891                      |                                          |                                                             | Dominated by extended dominance      |
| 9: Screening + contact precautions + ATB reduction | 93 552                         | 3.741                      |                                          |                                                             | Dominated                            |
| 4: ATB reduction                                   | 95 195                         | 4.075                      |                                          |                                                             | Dominated                            |
| 5: Screening + contact precautions                 | 97 350                         | 4.571                      |                                          |                                                             | Dominated                            |
| 1: Base case Hh 20% 40%                            | 100 905                        | 5.02                       |                                          |                                                             | Dominated                            |



If the baseline compliance with HH was 40% before and 50% after patient contact. HH improvement. e.g. to 60%/70% was confirmed to be cost-saving. Screening + cohorting was the second strategy with an ICER of €546/infection avoided vs. HH improvement (**Supplementary Table S3B**).

**Supplementary Table S3B** Results of sensitivity analysis. Cost-effectiveness of strategies when the baseline compliance with **Hand hygiene was set to 40%/50% (instead of 55%/60%)**.

| Strategy                                                             | Total cost/ 100 admissions (€) | Infections/ 100 admissions | Incremental cost/100 admissions (ΔC) (€) | Incremental effect (ΔE) (infections avoided/100 admissions) | ICER (ΔC/ΔE) (€ / infection avoided) |
|----------------------------------------------------------------------|--------------------------------|----------------------------|------------------------------------------|-------------------------------------------------------------|--------------------------------------|
| 2: Hh 60%/70%                                                        | 84 331                         | 3.191                      |                                          |                                                             |                                      |
| 6: Screening + cohorted staff + contact precautions                  | 84 561                         | 2.77                       | 230                                      | 0.421                                                       | 546                                  |
| 10: Screening + cohorted staff + contact precautions + ATB reduction | 92 803                         | 2.629                      | 8 242                                    | 0.141                                                       | 58 454                               |
| 3: Hh 40%/70%                                                        | 86 359                         | 3.698                      | 0                                        | 0                                                           | Dominated                            |
| 8: Hh 40%/70% + ATB reduction                                        | 89 451                         | 3.26                       | 0                                        | 0                                                           | Dominated                            |
| 7: Hh 60%/70% + ATB reduction                                        | 91 171                         | 2.96                       | 0                                        | 0                                                           | Dominated by extended dominance      |
| 9: Screening + contact precautions + ATB reduction                   | 96 676                         | 3.78                       | 0                                        | 0                                                           | Dominated                            |
| 4: ATB reduction                                                     | 98 264                         | 4.099                      | 0                                        | 0                                                           | Dominated                            |
| 5: Screening + contact precautions                                   | 98 308                         | 4.495                      | 0                                        | 0                                                           | Dominated                            |
| 1: Base case Hh 40%/50%                                              | 102 292                        | 4.949                      | 0                                        | 0                                                           | Dominated                            |

1  
2  
3 4. Impact of lower **sensitivity to detect ESBL-PE carriage** in screening strategies.  
4  
5

6 If the sensitivity to detect ESBL-PE on ICU admission was lower than in our core analysis and varied from 80% to 95%. HH 80%/80% (Strategy  
7 2) and HH 80%/80% and antibiotic reduction (Strategy 7) always dominated the screening strategies (Strategy 6 and 10) (**Supplementary Figure**  
8 **S2**).  
9  
10  
11  
12  
13  
14  
15  
16  
17  
18  
19  
20  
21  
22  
23  
24  
25  
26  
27  
28  
29  
30  
31  
32  
33  
34  
35  
36  
37  
38  
39  
40  
41  
42  
43  
44  
45  
46  
47

1  
2  
3  
4  
5  
6  
7  
8  
9  
10  
11  
12  
13  
14  
15  
16  
17  
18  
19  
20  
21  
22  
23  
24  
25  
26  
27  
28  
29  
30  
31  
32  
33  
34  
35  
36  
37  
38  
39  
40  
41  
42  
43  
44  
45  
46  
47

**Figure S2** Cost-effectiveness plane showing the incremental health benefits (infections avoided) and costs of screening and cohorting strategies relative to the Strategy 2. The sensitivity of detection of ESBL carriers at ICU admission in screening and isolation strategies varied from 80% to 95%. Strategies are: (2) Hand hygiene improvement to 80%/80%; (6) Screening of all admissions and cohorting of identified carriers; (7) Hand hygiene improvement to 80%/80% and Antibiotic reduction; (10) Screening of all admissions. cohorting of identified carriers and Antibiotic reduction.

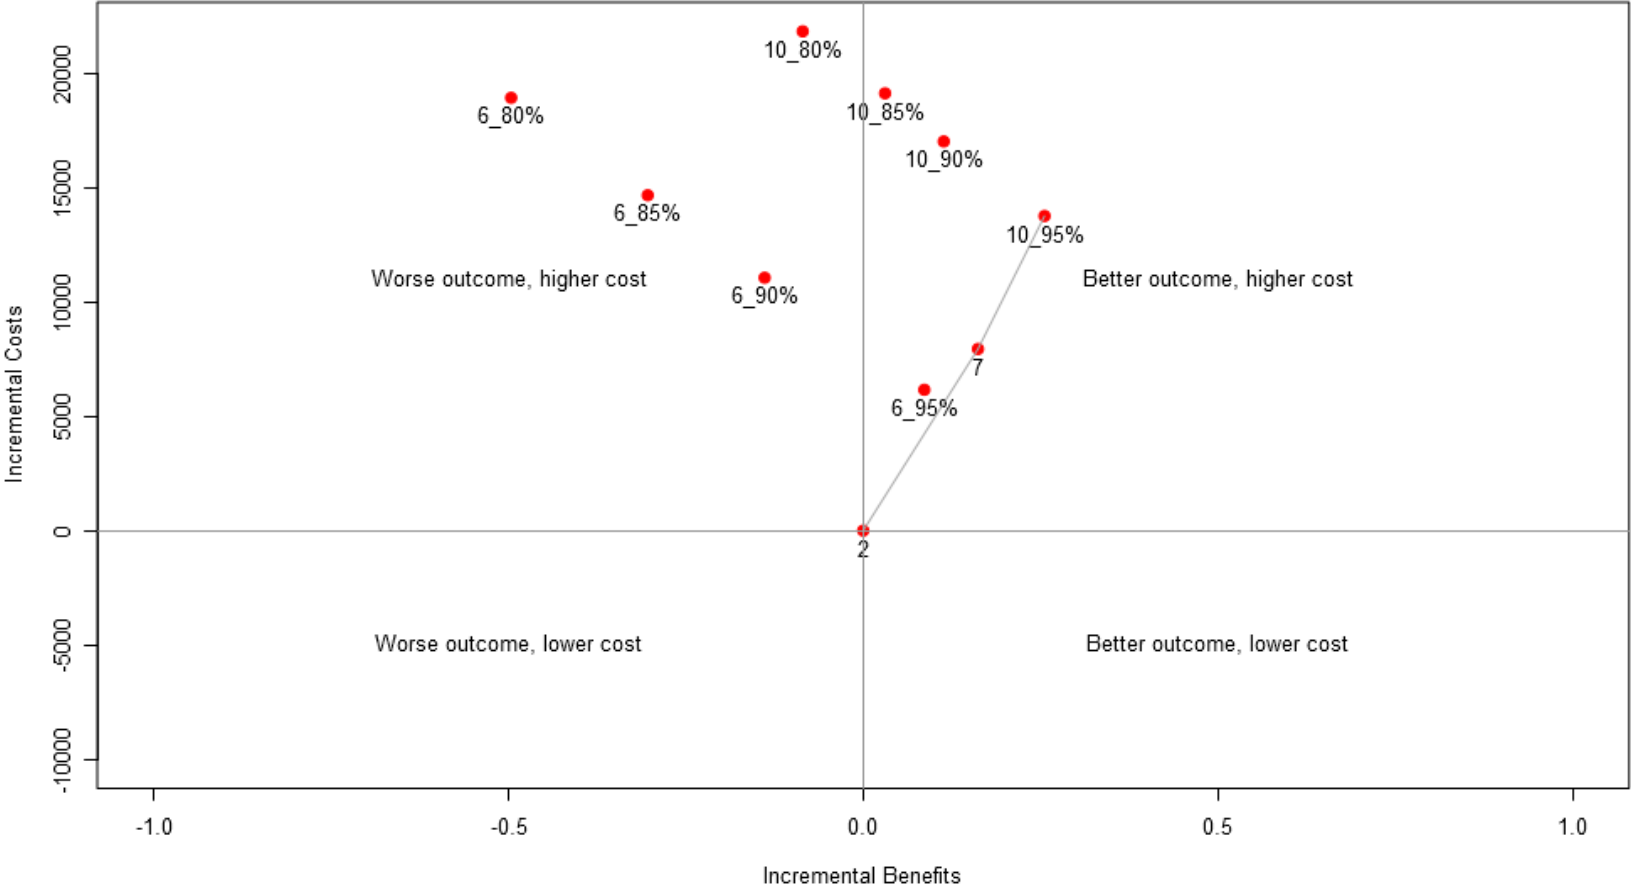

**Supplementary Table S4** Impact of a lower, 30% reduction in antibiotic prescribing.

| Strategy                                                                 | Total cost/ 100 admissions (€) | Infections/ 100 admissions | Incremental cost/100 admissions (ΔC) (€) | Incremental effect (ΔE) (infections avoided/100 admissions) | ICER (ΔC/ΔE) (€ / infection avoided) |
|--------------------------------------------------------------------------|--------------------------------|----------------------------|------------------------------------------|-------------------------------------------------------------|--------------------------------------|
| 2: Hh 80%/80%                                                            | 80 556                         | 2.890                      | 0                                        |                                                             |                                      |
| 7: Hh 80%/80% + ATB reduction 30%                                        | 89 254                         | 2.761                      | 8 698                                    | 0.129                                                       | 67 426                               |
| 10: Screening + cohorted staff + contact precautions + ATB reduction 30% | 95 343                         | 2.680                      | 6 089                                    | 0.081                                                       | 75 173                               |
| 3: Hh 55%/80%                                                            | 84 751                         | 3.514                      | 0                                        |                                                             |                                      |
| 6: Screening + cohorted staff + contact precautions                      | 86 713                         | 2.804                      | 0                                        |                                                             |                                      |
| 8: Hh 55%/80% + ATB reduction 30%                                        | 91 059                         | 3.242                      | 0                                        |                                                             |                                      |
| 5: Screening + contact precautions                                       | 96 716                         | 4.294                      | 0                                        |                                                             |                                      |
| 9: Screening + contact precautions + ATB reduction 30%                   | 97 620                         | 3.720                      | 0                                        |                                                             |                                      |
| 4: ATB reduction 30%                                                     | 104 271                        | 4.285                      | 0                                        |                                                             |                                      |
| 1: Base case                                                             | 105 344                        | 4.989                      | 0                                        |                                                             |                                      |

**Supplementary Table S5A** Impact of infection control nurse's time working on the hand hygiene program and the level of hand hygiene achieved on model predictions compared to the Base case strategy. The cost-effective ratio (CER) was calculated when the hand hygiene strategy was more expensive but more effective than the base case.

| Level of hand hygiene before contact with patient (%) | Level of hand hygiene after contact with patient (%) | Mean increase in hand hygiene from baseline (%) | Number of infections /100 admissions | Total cost /100 admissions (€) | CER (vs base case)                     |
|-------------------------------------------------------|------------------------------------------------------|-------------------------------------------------|--------------------------------------|--------------------------------|----------------------------------------|
| <b>Base case</b>                                      |                                                      |                                                 |                                      |                                |                                        |
| 55                                                    | 60                                                   | -                                               | 4.99                                 | 105 344                        | -                                      |
| <b>ICN working on Hh program at 1/4 time</b>          |                                                      |                                                 |                                      |                                |                                        |
| 55                                                    | 60                                                   | 0.0                                             | 4.99                                 | 112 783                        | Hh strategy dominated by the Base case |
| 60                                                    | 60                                                   | 2.5                                             | 4.65                                 | 106 497                        | 3 433                                  |
| 55                                                    | 65                                                   | 2.5                                             | 4.64                                 | 106 366                        | 2 965                                  |
| 60                                                    | 65                                                   | 5.0                                             | 4.29                                 | 99 722                         | Base case dominated by the Hh strategy |
| ⋮                                                     | ⋮                                                    | ⋮                                               | ⋮                                    | ⋮                              | Base case dominated by the Hh strategy |
| 80                                                    | 80                                                   | 22.5                                            | 2.89                                 | 74 103                         | Base case dominated by the Hh strategy |
| <b>ICN working on Hh strategy at 1/2 time</b>         |                                                      |                                                 |                                      |                                |                                        |
| 55                                                    | 60                                                   | 0.0                                             | 4.99                                 | 120 222                        | Hh strategy dominated by the Base case |
| 60                                                    | 60                                                   | 2.5                                             | 4.65                                 | 113 789                        | 25 146                                 |
| 55                                                    | 65                                                   | 2.5                                             | 4.64                                 | 113 675                        | 24 160                                 |
| 60                                                    | 65                                                   | 5.0                                             | 4.29                                 | 106 861                        | 2 182                                  |
| 65                                                    | 65                                                   | 7.5                                             | 4.02                                 | 101 484                        | Base case dominated by the Hh strategy |
| ⋮                                                     | ⋮                                                    | ⋮                                               | ⋮                                    | ⋮                              | Base case dominated by the Hh strategy |
| 80                                                    | 80                                                   | 22.5                                            | 2.89                                 | 80 556                         | Base case dominated by the Hh strategy |
| <b>ICN working on Hh strategy at full time</b>        |                                                      |                                                 |                                      |                                |                                        |
| 55                                                    | 60                                                   | 0.0                                             | 4.99                                 | 135 100                        | Hh strategy dominated by the Base case |
| 60                                                    | 60                                                   | 2.5                                             | 4.65                                 | 128 375                        | 68 573                                 |
| 55                                                    | 65                                                   | 2.5                                             | 4.64                                 | 128 292                        | 66 551                                 |
| 60                                                    | 65                                                   | 5.0                                             | 4.29                                 | 121 137                        | 22 712                                 |
| 65                                                    | 65                                                   | 7.5                                             | 4.02                                 | 115 442                        | 10 397                                 |

|    |    |             |      |         |                                        |
|----|----|-------------|------|---------|----------------------------------------|
| 55 | 70 | 5.0         | 4.22 | 119 423 | 18 278                                 |
| 60 | 70 | 7.5         | 3.98 | 114 488 | 9 029                                  |
| 65 | 70 | 10.0        | 3.75 | 110 092 | 3 823                                  |
| 70 | 70 | 12.5        | 3.53 | 105 942 | 411                                    |
| 55 | 75 | 7.5         | 3.85 | 111 932 | 5 806                                  |
| 60 | 75 | 10.0        | 3.68 | 108 574 | 2 468                                  |
| 65 | 75 | 12.5        | 3.51 | 105 357 | 9                                      |
| 70 | 75 | <b>15.0</b> | 3.32 | 101 754 | Base case dominated by the Hh strategy |
| ⋮  | ⋮  | ⋮           | ⋮    | ⋮       | Base case dominated by the Hh strategy |
| 80 | 80 | 22.5        | 2.89 | 93 462  | Base case dominated by the Hh strategy |

1  
2  
3  
4  
5  
6  
7  
8  
9  
10  
11  
12  
13  
14  
15  
16  
17  
18  
19  
20  
21  
22  
23  
24  
25  
26  
27  
28  
29  
30  
31  
32  
33  
34  
35  
36  
37  
38  
39  
40  
41  
42  
43  
44  
45  
46  
47

**Supplementary Table S5B** Impact of infection control nurse’s time working on the hand hygiene strategy and the level of hand hygiene achieved on model predictions compared to the Screening and cohorting strategy. The cost-effective ratio (CER) was calculated when the screening and cohorting strategy was more expensive but more effective than the hand hygiene.

| Level of hand hygiene before contact with patient (%) | Level of hand hygiene after contact with patient (%) | Mean increase in hand hygiene from baseline (%) | Number of infections/100 admissions | Total cost/100 admissions (€) | CER (vs Hand hygiene strategy)                   |
|-------------------------------------------------------|------------------------------------------------------|-------------------------------------------------|-------------------------------------|-------------------------------|--------------------------------------------------|
| <b>Screening and cohorting</b>                        |                                                      |                                                 |                                     |                               |                                                  |
| 55 (with non cohorted patients)                       | 60 (with non cohorted patients)                      |                                                 | 2.80                                | 86 713                        |                                                  |
| <b>ICN working on Hh strategy at 1/4 time</b>         |                                                      |                                                 |                                     |                               |                                                  |
| 55                                                    | 60                                                   | 0.0                                             | 4.99                                | 112 783                       | Hh strategy dominated by Screening and cohorting |
| :                                                     | :                                                    | :                                               | :                                   | :                             | Hh strategy dominated by Screening and cohorting |
| 70                                                    | 70                                                   | 12.5                                            | 3.53                                | 85 621                        | 1 496                                            |
| 55                                                    | 75                                                   | 7.5                                             | 3.85                                | 91 212                        | Hh strategy dominated by Screening and cohorting |
| 60                                                    | 75                                                   | 10.0                                            | 3.68                                | 88 104                        | Hh strategy dominated by Screening and cohorting |
| 65                                                    | 75                                                   | 12.5                                            | 3.51                                | 85 102                        | 2 283                                            |
| 70                                                    | 75                                                   | 15.0                                            | 3.32                                | 81 748                        | 9 554                                            |
| 75                                                    | 75                                                   | 17.5                                            | 3.15                                | 78 568                        | 23 561                                           |
| 55                                                    | 80                                                   | 10.0                                            | 3.51                                | 84 751                        | 2 763                                            |
| 60                                                    | 80                                                   | 12.5                                            | 3.38                                | 82 408                        | 7 507                                            |
| 65                                                    | 80                                                   | 15.0                                            | 3.24                                | 79 993                        | 15 442                                           |
| 70                                                    | 80                                                   | 17.5                                            | 3.12                                | 77 946                        | 28 012                                           |
| 75                                                    | 80                                                   | 20.0                                            | 2.99                                | 75 742                        | 58 203                                           |
| 80                                                    | 80                                                   | 22.5                                            | 2.89                                | 74 103                        | 146 278                                          |
| <b>ICN working on Hh strategy at 1/2 time</b>         |                                                      |                                                 |                                     |                               |                                                  |
| 55                                                    | 60                                                   | 0.0                                             | 4.99                                | 120 222                       | Hh strategy dominated by Screening and cohorting |
| :                                                     | :                                                    | :                                               | :                                   | :                             | Hh strategy dominated by Screening and cohorting |
| 75                                                    | 75                                                   | 17.5                                            | 3.15                                | 85 136                        | 4 561 €                                          |

|                                                |    |      |      |         |                                                  |
|------------------------------------------------|----|------|------|---------|--------------------------------------------------|
| 55                                             | 80 | 10.0 | 3.51 | 91 498  | Hh strategy dominated by Screening and cohorting |
| 60                                             | 80 | 12.5 | 3.38 | 89 094  | Hh strategy dominated by Screening and cohorting |
| 65                                             | 80 | 15.0 | 3.24 | 86 608  | Hh strategy dominated by Screening and cohorting |
| 70                                             | 80 | 17.5 | 3.12 | 84 516  | 7 023 €                                          |
| 75                                             | 80 | 20.0 | 2.99 | 82 227  | 23 801 €                                         |
| 80                                             | 80 | 22.5 | 2.89 | 80 556  | 71 424 €                                         |
| <b>ICN working on Hh strategy at full time</b> |    |      |      |         |                                                  |
| 55                                             | 60 | 0.0  | 4.99 | 135 100 | Hh strategy dominated by Screening and cohorting |
| ⋮                                              | ⋮  | ⋮    | ⋮    | ⋮       | Hh strategy dominated by Screening and cohorting |
| 80                                             | 80 | 22.5 | 2.89 | 93 462  | Hh strategy dominated by Screening and cohorting |



**Supplementary Figure S3** Results of probabilistic sensitivity analysis. Cost-effectiveness plane shows the incremental health benefits (infections avoided) and costs for Screening and cohorting (Strategy 6). relative to horizontal strategies: A) Hand hygiene improvement to 80%/80% (Strategy 2); B) Hand hygiene improvement to 55%/80% (Strategy3); C) Antibiotic reduction (Strategy 4). The frequency that the Strategy 6 was in one of four quadrant of CE plane is represented by “p”.

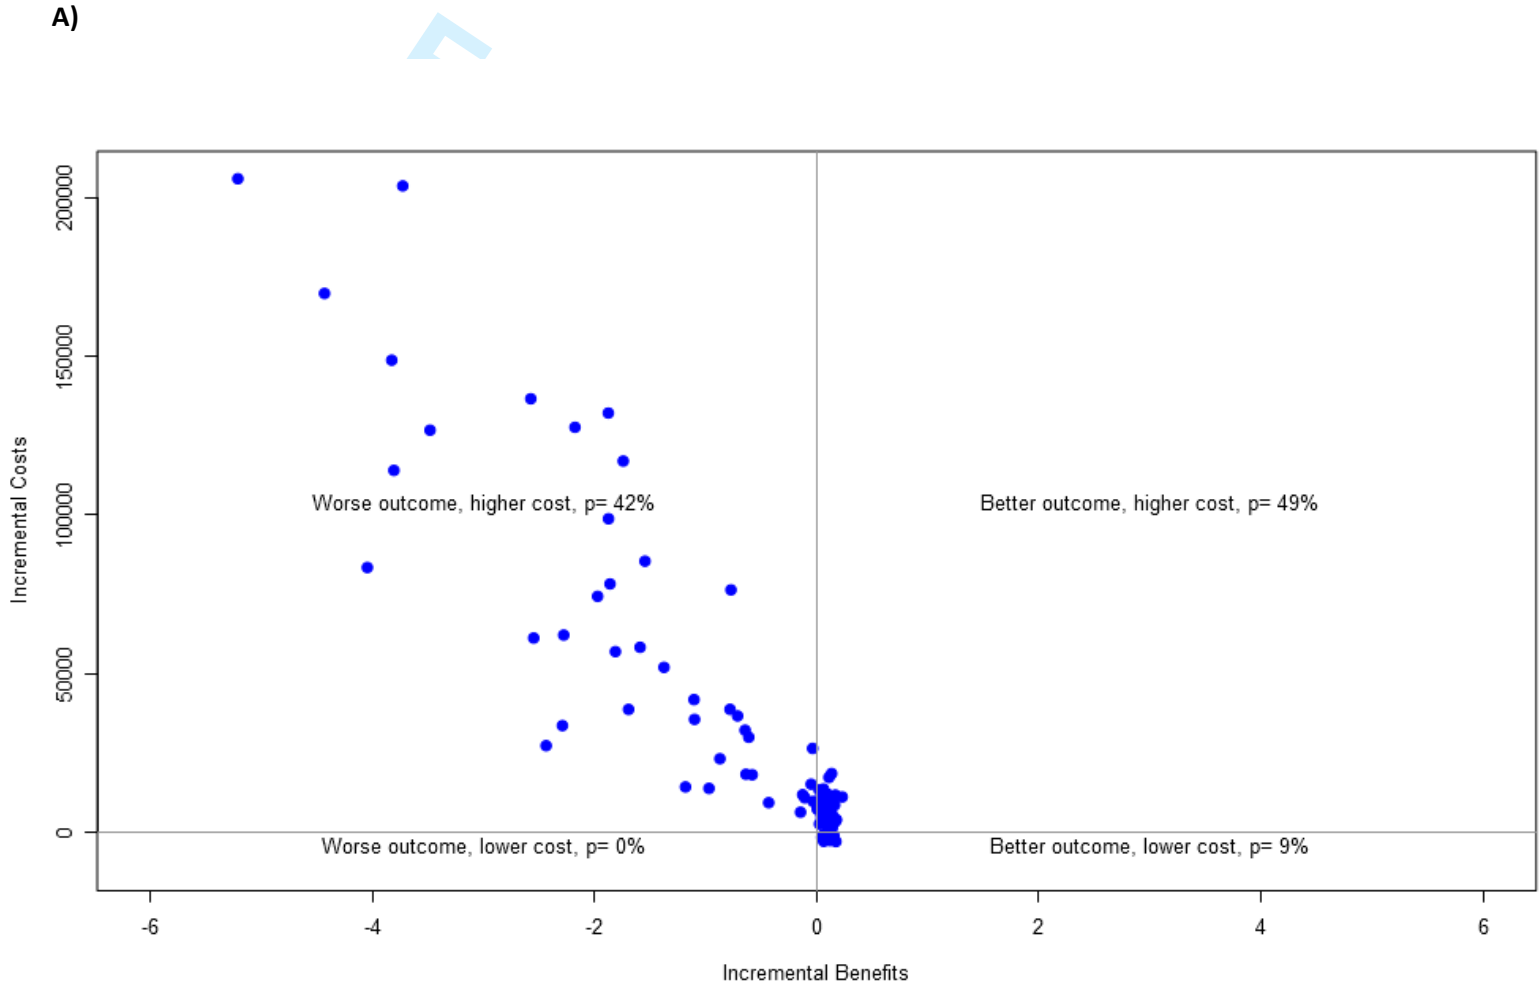

B)

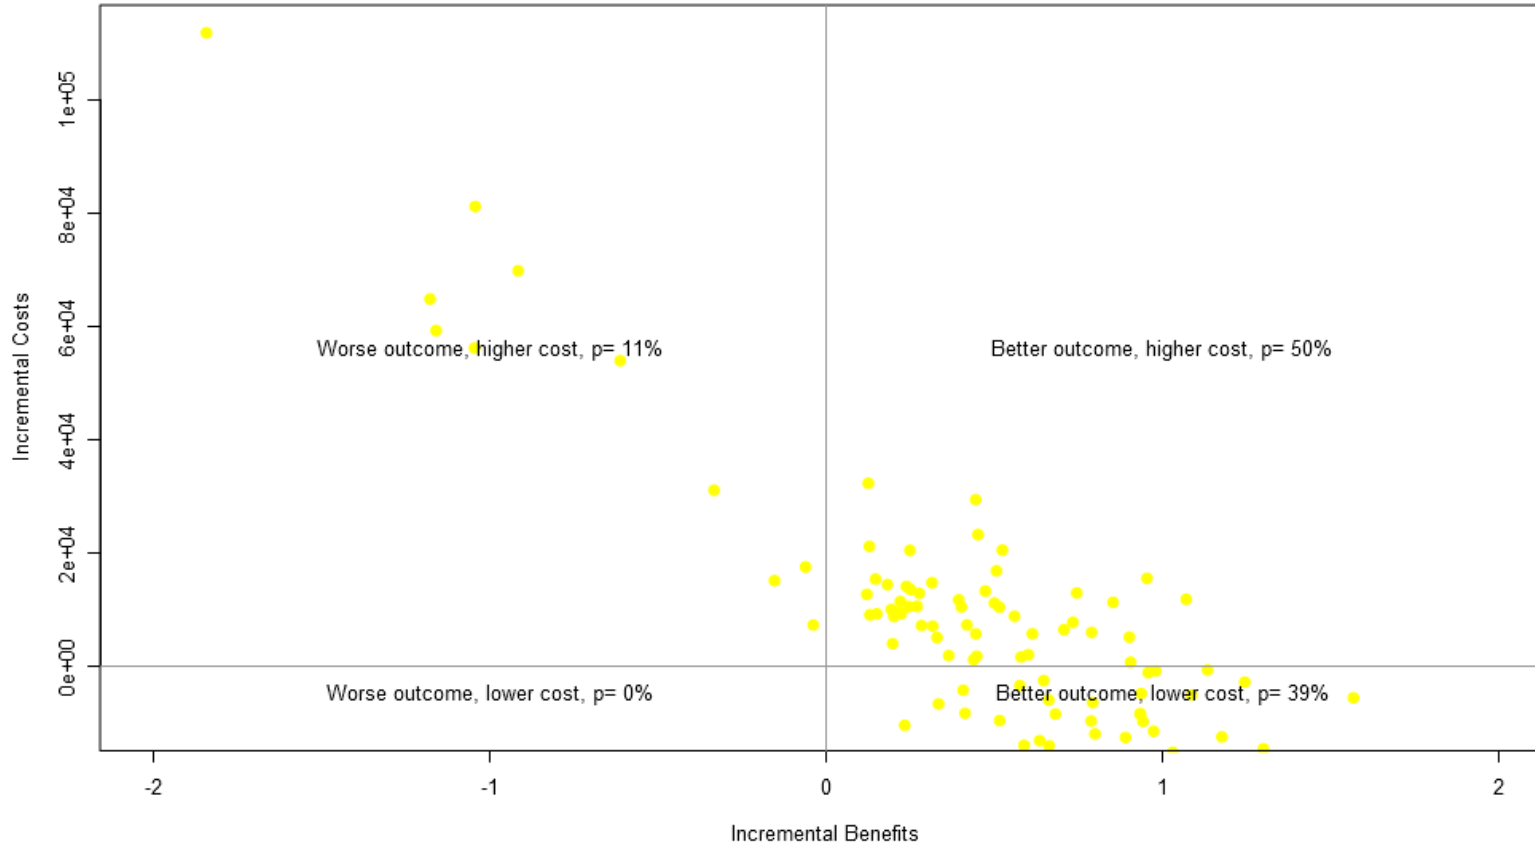

1  
2  
3  
4  
5  
6  
7  
8  
9  
10  
11  
12  
13  
14  
15  
16  
17  
18  
19  
20  
21  
22  
23  
24  
25  
26  
27  
28  
29  
30  
31  
32  
33  
34  
35  
36  
37  
38  
39  
40  
41  
42  
43  
44  
45  
46  
47

c)

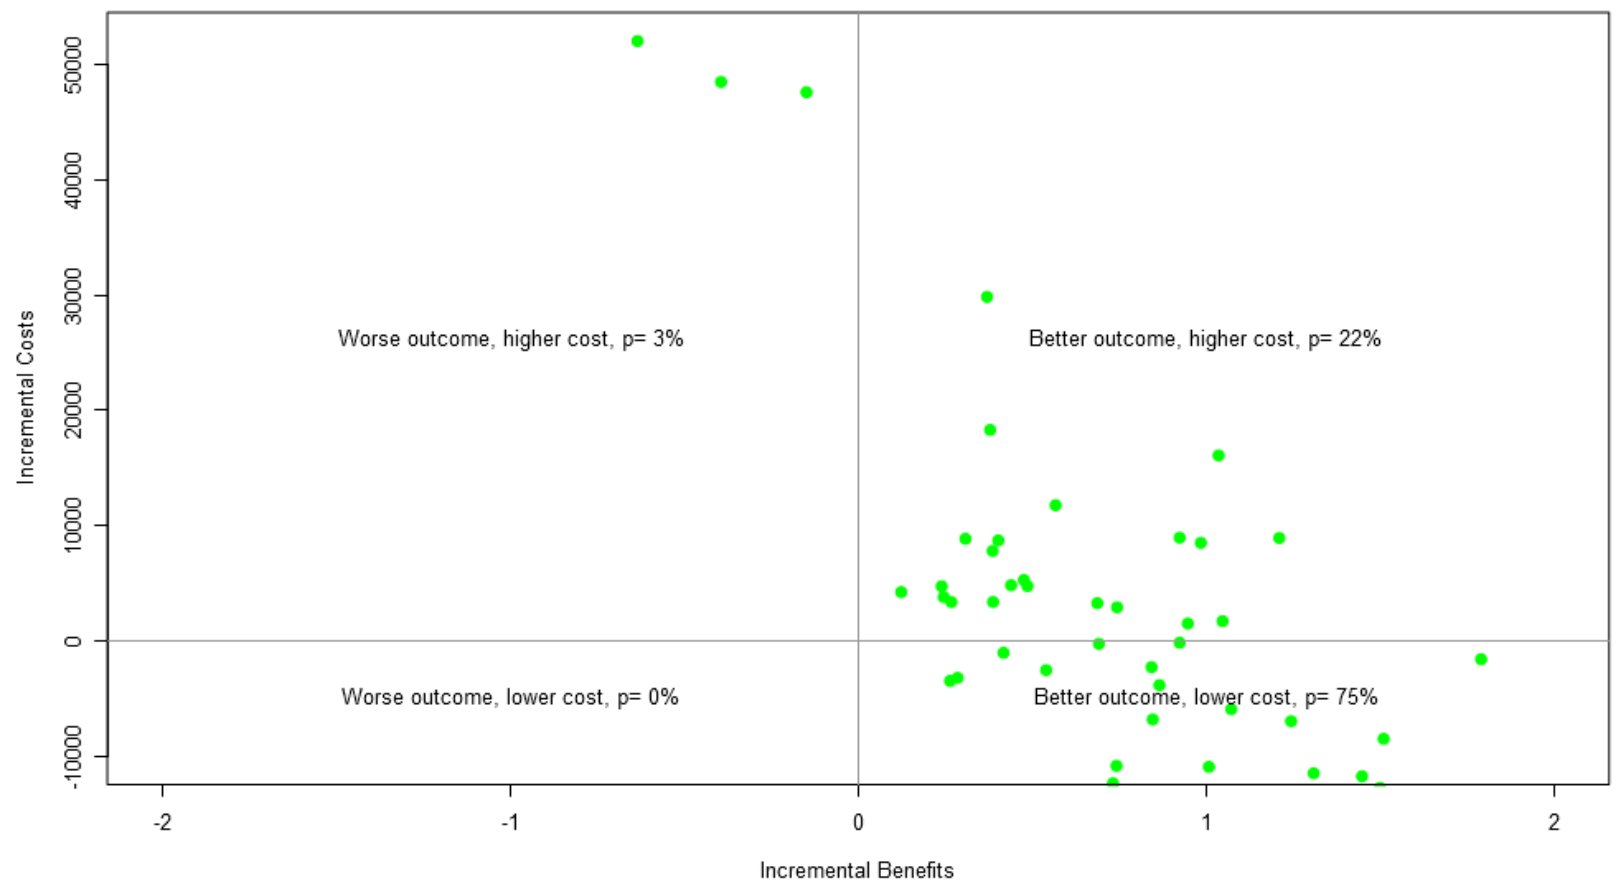

1  
2  
3  
4  
5  
6  
7  
8  
9  
10  
11  
12  
13  
14  
15  
16  
17  
18  
19  
20  
21  
22  
23  
24  
25  
26  
27  
28  
29  
30  
31  
32  
33  
34  
35  
36  
37  
38  
39  
40  
41  
42  
43  
44  
45  
46  
47

1  
2  
3 **Supplementary Figure S4** Results of probabilistic sensitivity analysis. Cost-effectiveness plane shows the incremental health benefits (infections avoided)  
4 and costs for Screening and contact precautions (Strategy 5). relative to horizontal strategies: A) Hand hygiene improvement to 80%/80% (Strategy 2); B)  
5 Hand hygiene improvement to 55%/80% (Strategy 3); C) Antibiotic reduction (Strategy 4). The frequency that the Strategy 6 was in one of four quadrant of  
6 CE plane is represented by “p”.

7  
8  
9 **A)**

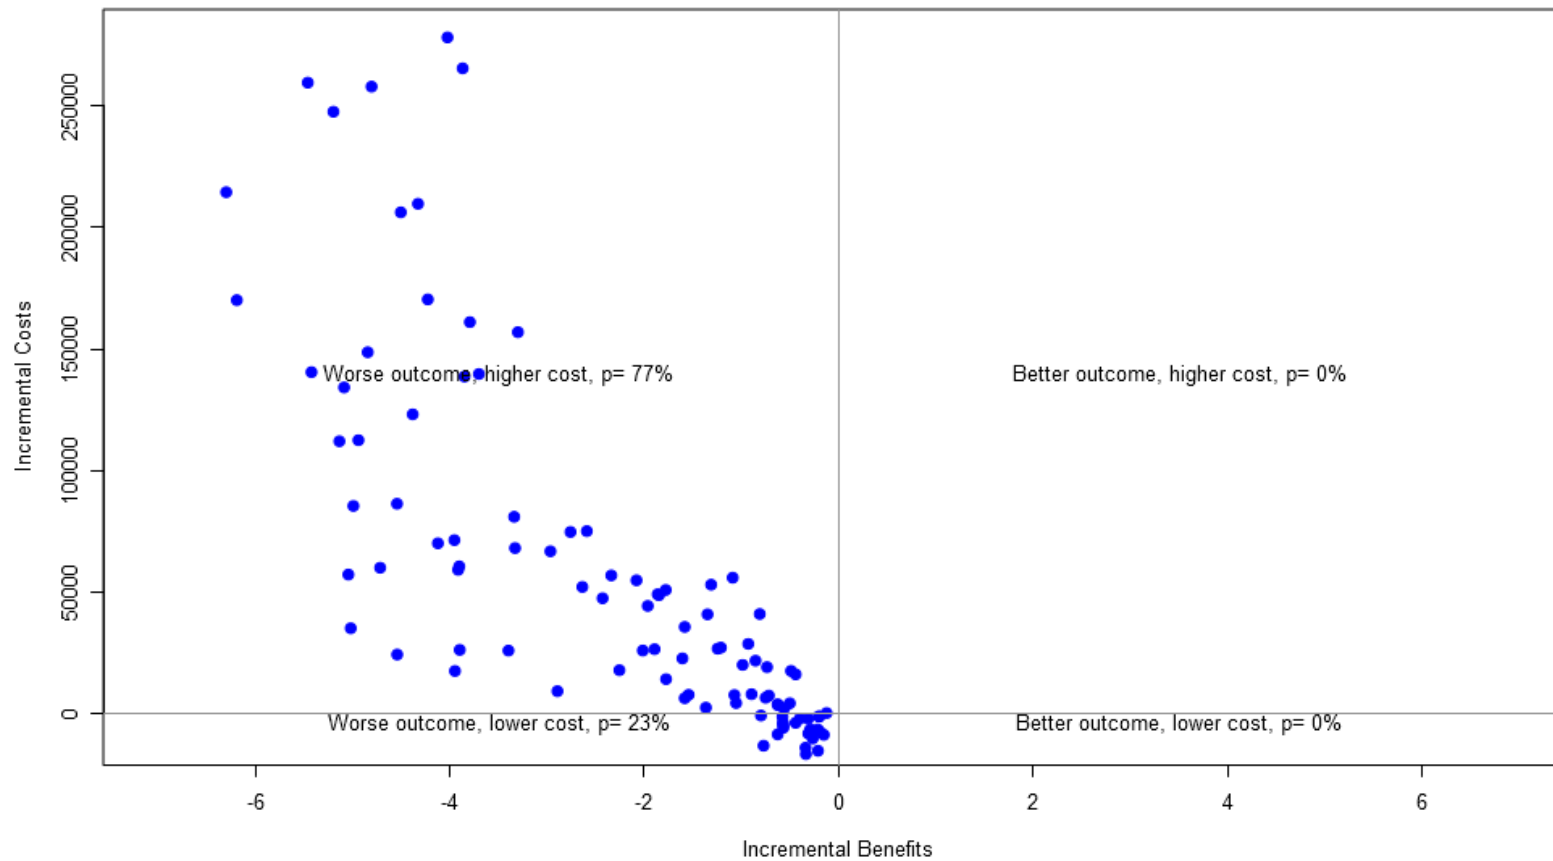

1  
2  
3  
4  
5  
6  
7  
8  
9  
10  
11  
12  
13  
14  
15  
16  
17  
18  
19  
20  
21  
22  
23  
24  
25  
26  
27  
28  
29  
30  
31  
32  
33  
34  
35  
36  
37  
38  
39  
40  
41  
42  
43  
44  
45  
46  
47

B)

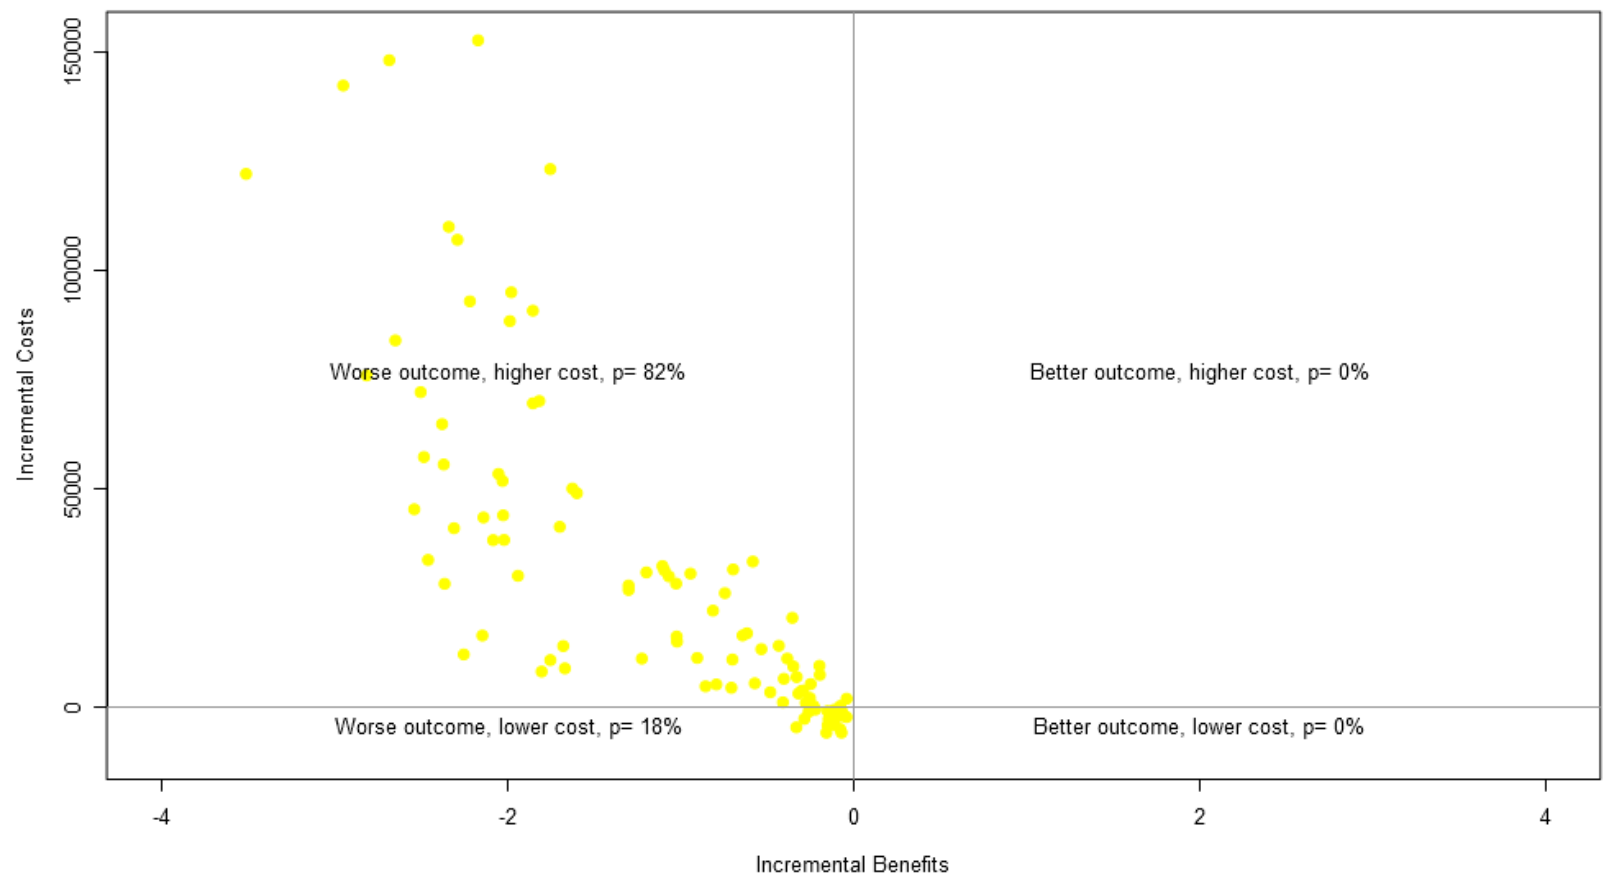

c)

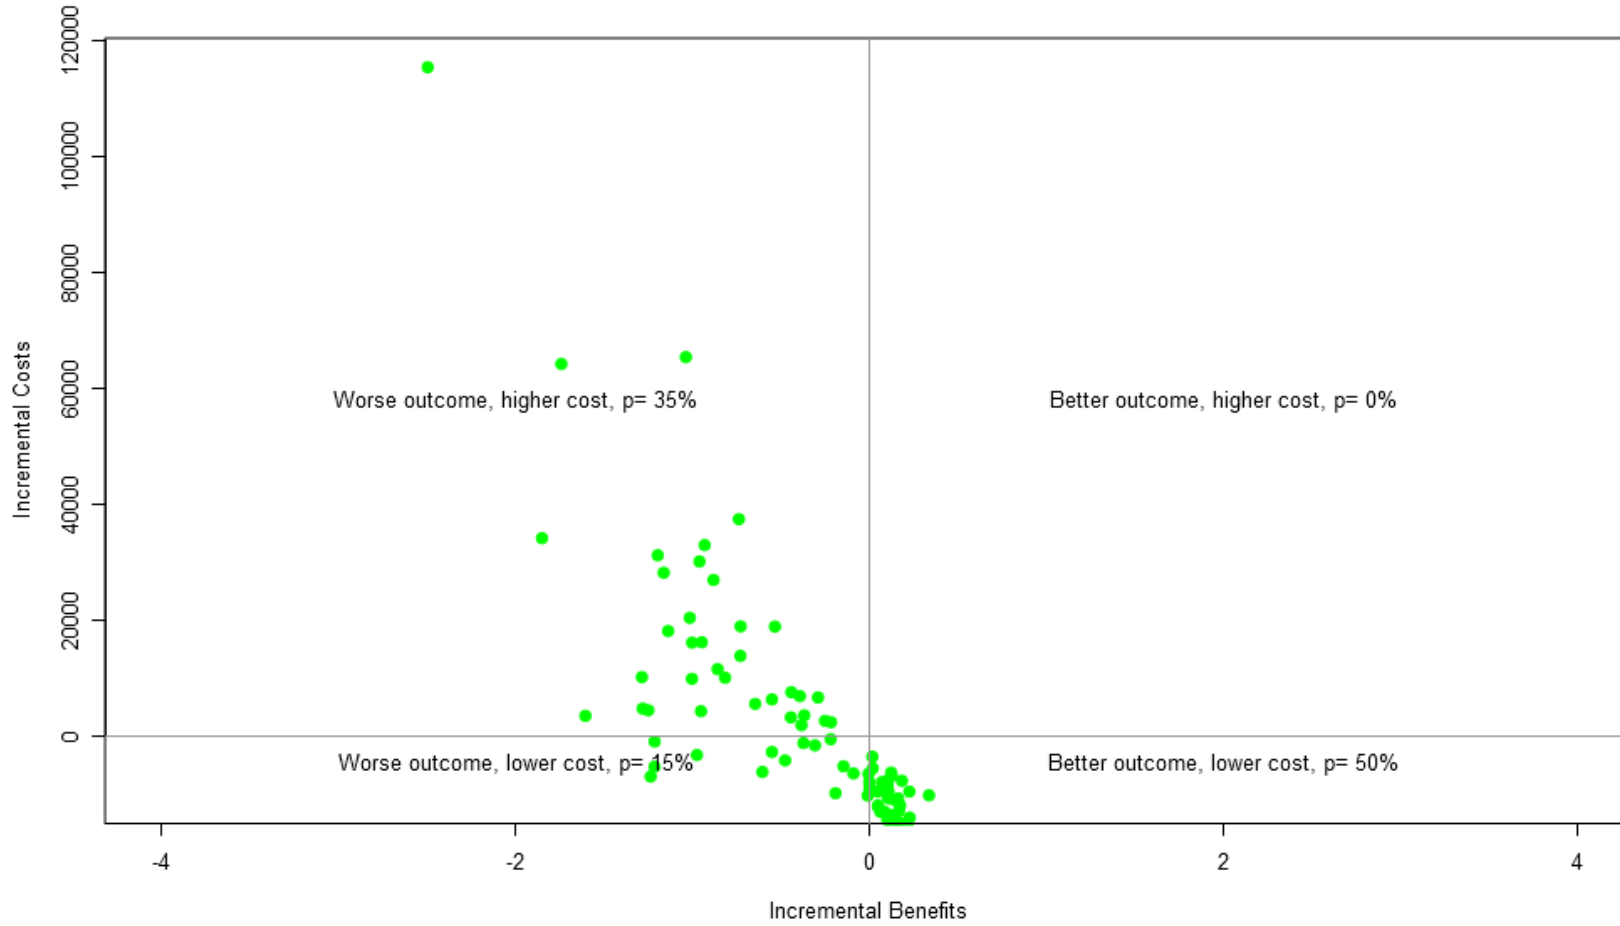

## CHEERS Checklist

## Items to include when reporting economic evaluations of health interventions

The **ISPOR CHEERS Task Force Report**, *Consolidated Health Economic Evaluation Reporting Standards (CHEERS)—Explanation and Elaboration: A Report of the ISPOR Health Economic Evaluations Publication Guidelines Good Reporting Practices Task Force*, provides examples and further discussion of the 24-item CHEERS Checklist and the CHEERS Statement. It may be accessed via the *Value in Health* or via the ISPOR Health Economic Evaluation Publication Guidelines – CHEERS: Good Reporting Practices webpage: <http://www.ispor.org/TaskForces/EconomicPubGuidelines.asp>

| Section/item                    | Item No | Recommendation                                                                                                                                                                             | Reported on page No/line No                   |
|---------------------------------|---------|--------------------------------------------------------------------------------------------------------------------------------------------------------------------------------------------|-----------------------------------------------|
| <b>Title and abstract</b>       |         |                                                                                                                                                                                            |                                               |
| Title                           | 1       | Identify the study as an economic evaluation or use more specific terms such as “cost-effectiveness analysis”, and describe the interventions compared.                                    | Page 1                                        |
| Abstract                        | 2       | Provide a structured summary of objectives, perspective, setting, methods (including study design and inputs), results (including base case and uncertainty analyses), and conclusions.    | Page 2                                        |
| <b>Introduction</b>             |         |                                                                                                                                                                                            |                                               |
| Background and objectives       | 3       | Provide an explicit statement of the broader context for the study.<br>Present the study question and its relevance for health policy or practice decisions.                               | Page 4-5                                      |
| <b>Methods</b>                  |         |                                                                                                                                                                                            |                                               |
| Target population and subgroups | 4       | Describe characteristics of the base case population and subgroups analysed, including why they were chosen.                                                                               | Page 5 and Supplementary Text S1              |
| Setting and location            | 5       | State relevant aspects of the system(s) in which the decision(s) need(s) to be made.                                                                                                       | Page 7- "Costs" section                       |
| Study perspective               | 6       | Describe the perspective of the study and relate this to the costs being evaluated.                                                                                                        | Page 6 "Inf. control strategies" section      |
| Comparators                     | 7       | Describe the interventions or strategies being compared and state why they were chosen.                                                                                                    | Page 5- "The model" section.                  |
| Time horizon                    | 8       | State the time horizon(s) over which costs and consequences are being evaluated and say why appropriate.                                                                                   | Not applicable- one-year time horizon         |
| Discount rate                   | 9       | Report the choice of discount rate(s) used for costs and outcomes and say why appropriate.                                                                                                 | Page 5- "The model" section and Supp. Text S1 |
| Choice of health outcomes       | 10      | Describe what outcomes were used as the measure(s) of benefit in the evaluation and their relevance for the type of analysis performed.                                                    | ---                                           |
| Measurement of effectiveness    | 11a     | <i>Single study-based estimates:</i> Describe fully the design features of the single effectiveness study and why the single study was a sufficient source of clinical effectiveness data. | ---                                           |

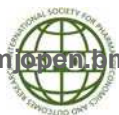

|    |                         |     |                                                                                                                                                                                                                                                                                                                                                       |                                                                                  |
|----|-------------------------|-----|-------------------------------------------------------------------------------------------------------------------------------------------------------------------------------------------------------------------------------------------------------------------------------------------------------------------------------------------------------|----------------------------------------------------------------------------------|
| 1  |                         | 11b | <i>Synthesis-based estimates:</i> Describe fully the methods used for identification of included studies and synthesis of clinical effectiveness data.                                                                                                                                                                                                | Supp.Text S1                                                                     |
| 2  |                         |     |                                                                                                                                                                                                                                                                                                                                                       |                                                                                  |
| 3  |                         |     |                                                                                                                                                                                                                                                                                                                                                       |                                                                                  |
| 4  |                         |     |                                                                                                                                                                                                                                                                                                                                                       |                                                                                  |
| 5  | Measurement and         | 12  | If applicable, describe the population and methods used to elicit preferences for outcomes.                                                                                                                                                                                                                                                           | ---                                                                              |
| 6  | valuation of preference |     |                                                                                                                                                                                                                                                                                                                                                       |                                                                                  |
| 7  | based outcomes          |     |                                                                                                                                                                                                                                                                                                                                                       |                                                                                  |
| 8  |                         |     |                                                                                                                                                                                                                                                                                                                                                       |                                                                                  |
| 9  | Estimating resources    | 13a | <i>Single study-based economic evaluation:</i> Describe approaches used to estimate resource use associated with the alternative interventions. Describe primary or secondary research methods for valuing each resource item in terms of its unit cost. Describe any adjustments made to approximate to opportunity costs.                           | ---                                                                              |
| 10 | and costs               |     |                                                                                                                                                                                                                                                                                                                                                       |                                                                                  |
| 11 |                         |     |                                                                                                                                                                                                                                                                                                                                                       |                                                                                  |
| 12 |                         | 13b | <i>Model-based economic evaluation:</i> Describe approaches and data sources used to estimate resource use associated with model health states. Describe primary or secondary research methods for valuing each resource item in terms of its unit cost. Describe any adjustments made to approximate to opportunity costs.                           | Page 7-<br>"Costs" section<br>and<br>Supplementary<br>Text S1-page 7             |
| 13 |                         |     |                                                                                                                                                                                                                                                                                                                                                       |                                                                                  |
| 14 |                         |     |                                                                                                                                                                                                                                                                                                                                                       |                                                                                  |
| 15 |                         |     |                                                                                                                                                                                                                                                                                                                                                       |                                                                                  |
| 16 |                         |     |                                                                                                                                                                                                                                                                                                                                                       |                                                                                  |
| 17 |                         |     |                                                                                                                                                                                                                                                                                                                                                       |                                                                                  |
| 18 |                         |     |                                                                                                                                                                                                                                                                                                                                                       |                                                                                  |
| 19 |                         |     |                                                                                                                                                                                                                                                                                                                                                       |                                                                                  |
| 20 |                         |     |                                                                                                                                                                                                                                                                                                                                                       |                                                                                  |
| 21 |                         |     |                                                                                                                                                                                                                                                                                                                                                       |                                                                                  |
| 22 |                         |     |                                                                                                                                                                                                                                                                                                                                                       |                                                                                  |
| 23 | Currency, price date,   | 14  | Report the dates of the estimated resource quantities and unit costs. Describe methods for adjusting estimated unit costs to the year of reported costs if necessary. Describe methods for converting costs into a common currency base and the exchange rate.                                                                                        | Page 7- "Costs"<br>section,<br>Table 1 and<br>Suppl.Text S1, p.5                 |
| 24 | and conversion          |     |                                                                                                                                                                                                                                                                                                                                                       |                                                                                  |
| 25 |                         |     |                                                                                                                                                                                                                                                                                                                                                       |                                                                                  |
| 26 |                         |     |                                                                                                                                                                                                                                                                                                                                                       |                                                                                  |
| 27 |                         |     |                                                                                                                                                                                                                                                                                                                                                       |                                                                                  |
| 28 |                         |     |                                                                                                                                                                                                                                                                                                                                                       |                                                                                  |
| 29 | Choice of model         | 15  | Describe and give reasons for the specific type of decision-analytical model used. Providing a figure to show model structure is strongly recommended.                                                                                                                                                                                                | Page 5- The model<br>section, Figure 1<br>and Suppl.Text S1                      |
| 30 |                         |     |                                                                                                                                                                                                                                                                                                                                                       |                                                                                  |
| 31 |                         |     |                                                                                                                                                                                                                                                                                                                                                       |                                                                                  |
| 32 |                         |     |                                                                                                                                                                                                                                                                                                                                                       |                                                                                  |
| 33 | Assumptions             | 16  | Describe all structural or other assumptions underpinning the decision-analytical model.                                                                                                                                                                                                                                                              | Suppl.Text S1                                                                    |
| 34 |                         |     |                                                                                                                                                                                                                                                                                                                                                       |                                                                                  |
| 35 | Analytical methods      | 17  | Describe all analytical methods supporting the evaluation. This could include methods for dealing with skewed, missing, or censored data; extrapolation methods; methods for pooling data; approaches to validate or make adjustments (such as half cycle corrections) to a model; and methods for handling population heterogeneity and uncertainty. | Page 8-<br>"Sensitivity<br>analysis"<br>section and<br>Suppl.Text S1-<br>Table 1 |
| 36 |                         |     |                                                                                                                                                                                                                                                                                                                                                       |                                                                                  |
| 37 |                         |     |                                                                                                                                                                                                                                                                                                                                                       |                                                                                  |
| 38 |                         |     |                                                                                                                                                                                                                                                                                                                                                       |                                                                                  |
| 39 |                         |     |                                                                                                                                                                                                                                                                                                                                                       |                                                                                  |
| 40 |                         |     |                                                                                                                                                                                                                                                                                                                                                       |                                                                                  |
| 41 |                         |     |                                                                                                                                                                                                                                                                                                                                                       |                                                                                  |
| 42 |                         |     |                                                                                                                                                                                                                                                                                                                                                       |                                                                                  |
| 43 | <b>Results</b>          |     |                                                                                                                                                                                                                                                                                                                                                       |                                                                                  |
| 44 | Study parameters        | 18  | Report the values, ranges, references, and, if used, probability distributions for all parameters. Report reasons or sources for distributions used to represent uncertainty where appropriate. Providing a table to show the input values is strongly recommended.                                                                                   | Table 1<br>and<br>Suppl.Text S1-<br>Table 1                                      |
| 45 |                         |     |                                                                                                                                                                                                                                                                                                                                                       |                                                                                  |
| 46 |                         |     |                                                                                                                                                                                                                                                                                                                                                       |                                                                                  |
| 47 |                         |     |                                                                                                                                                                                                                                                                                                                                                       |                                                                                  |
| 48 |                         |     |                                                                                                                                                                                                                                                                                                                                                       |                                                                                  |
| 49 |                         |     |                                                                                                                                                                                                                                                                                                                                                       |                                                                                  |
| 50 | Incremental costs and   | 19  | For each intervention, report mean values for the main categories of estimated costs and outcomes of interest, as well as mean differences between the comparator groups. If applicable, report incremental cost-effectiveness ratios.                                                                                                                | Table 2                                                                          |
| 51 | outcomes                |     |                                                                                                                                                                                                                                                                                                                                                       |                                                                                  |
| 52 |                         |     |                                                                                                                                                                                                                                                                                                                                                       |                                                                                  |
| 53 |                         |     |                                                                                                                                                                                                                                                                                                                                                       |                                                                                  |
| 54 |                         |     |                                                                                                                                                                                                                                                                                                                                                       |                                                                                  |
| 55 | Characterising          | 20a | <i>Single study-based economic evaluation:</i> Describe the effects of sampling uncertainty for the estimated incremental cost and incremental effectiveness parameters, together with the impact                                                                                                                                                     | ---                                                                              |
| 56 | uncertainty             |     |                                                                                                                                                                                                                                                                                                                                                       |                                                                                  |
| 57 |                         |     |                                                                                                                                                                                                                                                                                                                                                       |                                                                                  |
| 58 |                         |     |                                                                                                                                                                                                                                                                                                                                                       |                                                                                  |
| 59 |                         |     |                                                                                                                                                                                                                                                                                                                                                       |                                                                                  |
| 60 |                         |     |                                                                                                                                                                                                                                                                                                                                                       |                                                                                  |





|    |                       |                                                                      |                |
|----|-----------------------|----------------------------------------------------------------------|----------------|
| 1  |                       | of methodological assumptions (such as discount rate, study          | _____          |
| 2  |                       | perspective).                                                        | _____          |
| 3  |                       |                                                                      |                |
| 4  | 20b                   | <i>Model-based economic evaluation</i> : Describe the effects on the | Page 11 and    |
| 5  |                       | results of uncertainty for all input parameters, and uncertainty     | Suppl. Text S2 |
| 6  |                       | related to the structure of the model and assumptions.               | _____          |
| 7  | Characterising        | 21                                                                   |                |
| 8  | heterogeneity         |                                                                      |                |
| 9  |                       | If applicable, report differences in costs, outcomes, or cost-       | ---            |
| 10 |                       | effectiveness that can be explained by variations between            |                |
| 11 |                       | subgroups of patients with different baseline characteristics or     |                |
| 12 |                       | other observed variability in effects that are not reducible by      |                |
| 13 |                       | more information.                                                    | _____          |
| 14 | <b>Discussion</b>     |                                                                      |                |
| 15 | Study findings,       | 22                                                                   |                |
| 16 | limitations,          |                                                                      | Pages 12–17    |
| 17 | generalisability, and | Summarise key study findings and describe how they support           |                |
| 18 | current knowledge     | the conclusions reached. Discuss limitations and the                 |                |
| 19 |                       | generalisability of the findings and how the findings fit with       |                |
| 20 |                       | current knowledge.                                                   | _____          |
| 21 | <b>Other</b>          |                                                                      |                |
| 22 | Source of funding     | 23                                                                   |                |
| 23 |                       |                                                                      | Page 18        |
| 24 |                       | Describe how the study was funded and the role of the funder         |                |
| 25 | Conflicts of interest | 24                                                                   |                |
| 26 |                       |                                                                      | Page 18        |
| 27 |                       | Describe any potential for conflict of interest of study             |                |
| 28 |                       | contributors in accordance with journal policy. In the absence       |                |
| 29 |                       | of a journal policy, we recommend authors comply with                |                |
| 30 |                       | International Committee of Medical Journal Editors                   |                |
| 31 |                       | recommendations.                                                     | _____          |

For consistency, the CHEERS Statement checklist format is based on the format of the CONSORT statement checklist

The **ISPOR CHEERS Task Force Report** provides examples and further discussion of the 24-item CHEERS Checklist and the CHEERS Statement. It may be accessed via the *Value in Health* link or via the ISPOR Health Economic Evaluation Publication Guidelines – CHEERS: Good Reporting Practices webpage: <http://www.ispor.org/TaskForces/EconomicPubGuidelines.asp>

The citation for the CHEERS Task Force Report is:

Husereau D, Drummond M, Petrou S, et al. Consolidated health economic evaluation reporting standards (CHEERS)—Explanation and elaboration: A report of the ISPOR health economic evaluations publication guidelines good reporting practices task force. *Value Health* 2013;16:231-50.



Supplement: bmjopen-2017-017402.draft_revisions.pdf [file bmjopen-2017-017402.draft_revisions.pdf]
