# Supplementary material for: Universal or targeted approach to prevent the transmission of extended-spectrum beta-lactamase-producing Enterobacteriaceae in intensive care units: a cost-effectiveness analysis
Source: PubMed Central journal article supplement — BMJ Open. 2017 Nov 3;7(11):e017402. doi: 10.1136/bmjopen-2017-017402 (PMC5722099; doi:10.1136/bmjopen-2017-017402), 2017-11-03

## Supplementary material

### Supplementary Text S2- Sensitivity analyses

#### 1. Impact of prevalence on admission on health outcomes and costs

The prevalence of ESBL-PE carriage on ICU admission highly influenced health outcomes and costs (**Supplementary Figure S1**) as well as the ranking of the strategies (**Supplementary Table S1**). However, improvement of HH to 80%/80% (Strategy 2) remained the most cost saving strategy, if the prevalence on admission was from 5% to 50%. If 50% of patients carried ESBL-PE on ICU admission, Strategy 2 was dominated by screening + cohorting (Strategy 6).

**Figure S1** Impact of prevalence on admission on the number of ESBL-PE infections and total cost of strategies for: (1) Base Case (reference strategy with no control intervention and hand hygiene compliance of 55%/60% before/after patient contact); (2) Hand hygiene improvement to 80%/80%; (6) Screening of all admissions and cohorting of identified carriers; (7) Hand hygiene improvement to 80%/80% and Antibiotic reduction; (10) Screening of all admissions, cohorting of identified carriers and Antibiotic reduction.

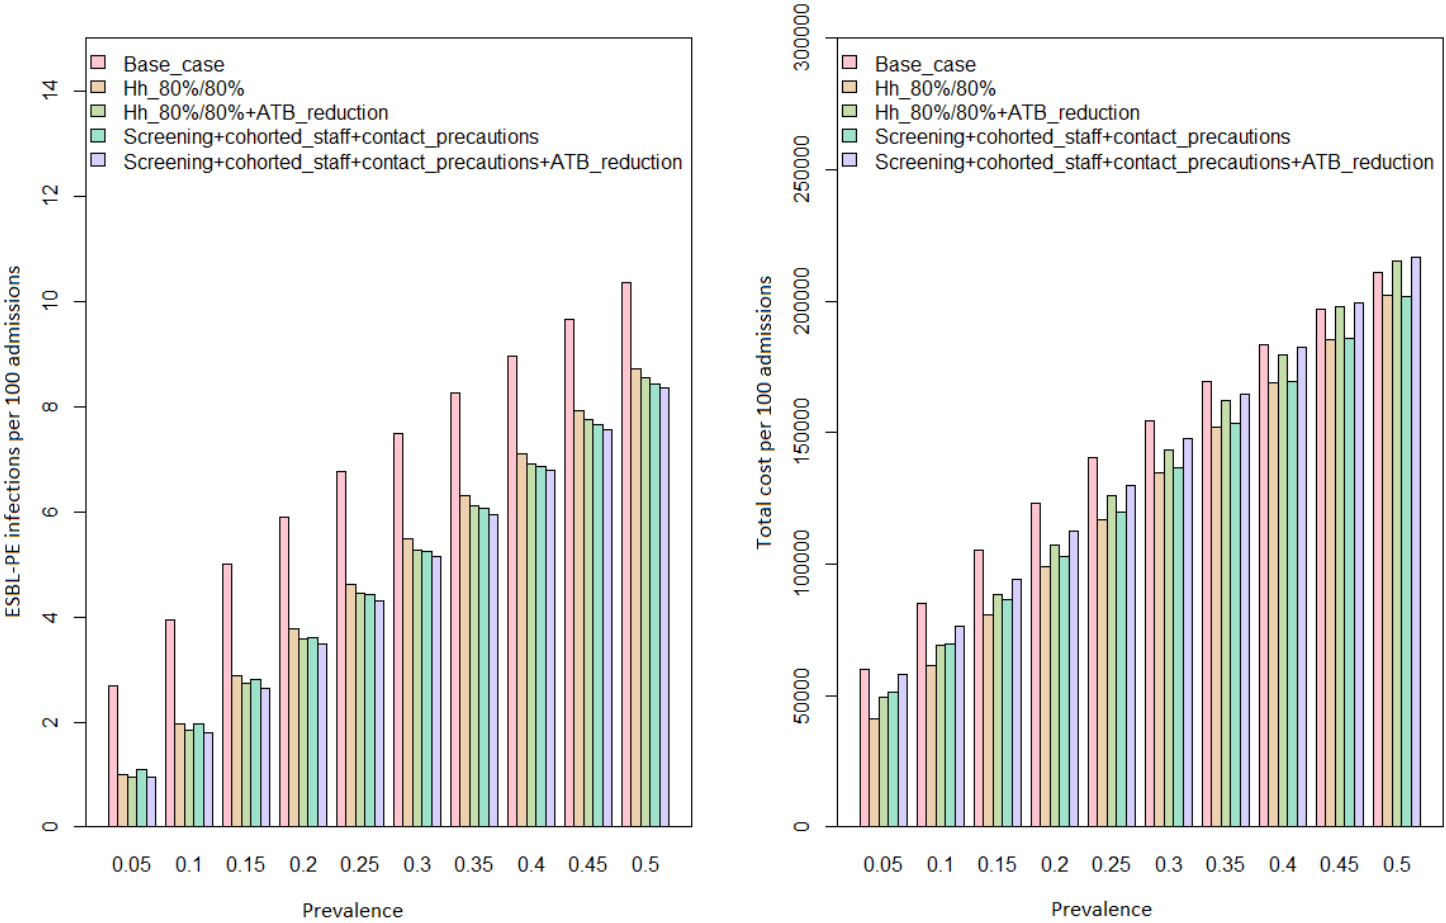

When the prevalence on admission was less than 15% the improvement of hand hygiene to 80%/80% (Strategy 2) was the most cost-saving strategy. The second strategy on the efficiency frontier was the combination of hand hygiene 80%/80% with antibiotic reduction (Strategy 7). When the prevalence was 15% the Strategy 10 (Screening + cohorting + ATB reduction) joined the efficiency frontier too. When the prevalence varied from 20% to 45%. Hand hygiene 80%/80% was always on the top of the ranking. followed by Screening + cohorting (Strategy 6) and Screening + cohorting + ATB reduction (Strategy 10). Finally, when 50% of patients carried ESBL-PE on ICU admission. hand hygiene was dominated by screening + cohorting (Strategy6).

**Supplementary Table S1.** Results of sensitivity analysis. Cost-effectiveness of strategies under **different levels of ESBL-PE carriage on admission**. The prevalence on admission varied from 0.05 to 0.5.

| Strategy                                  | Prevalence on admission | Total cost/ 100 admissions (€) | Infections/ 100 admissions | Incremental cost/100 admissions (ΔC) (€) | Incremental effect (ΔE) (infections avoided/100 admissions) | ICER (ΔC/ΔE) (€ / infection avoided) |
|-------------------------------------------|-------------------------|--------------------------------|----------------------------|------------------------------------------|-------------------------------------------------------------|--------------------------------------|
| <b>2: Hh 80%/80%</b>                      | 0.05                    | 41 225                         | 1.01                       |                                          |                                                             |                                      |
| 7: Hh 80%/80% + ATB reduction             |                         | 49 639                         | 0.94                       | 8 414                                    | 0.07                                                        | 120 200                              |
| 6: Screening + cohorting                  |                         | 51 542                         | 1.09                       |                                          |                                                             | Dominated                            |
| 10: Screening + cohorting + ATB reduction |                         | 58 218                         | 0.94                       |                                          |                                                             | Dominated by extended dominance      |
| 1: Base case                              |                         | 60 031                         | 2.68                       |                                          |                                                             | Dominated                            |
| <b>2: Hh 80%/80%</b>                      | 0.15                    | 80 556                         | 2.89                       |                                          |                                                             |                                      |
| 7: Hh 80%/80% + ATB reduction             |                         | 88 498                         | 2.73                       | 7 942                                    | 0.16                                                        | 49 638                               |
| 10: Screening + cohorting + ATB reduction |                         | 94 313                         | 2.63                       | 5 815                                    | 0.09                                                        | 64 611                               |
| 6: Screening + cohorting                  |                         | 86 713                         | 2.80                       |                                          |                                                             | Dominated by extended dominance      |
| 1: Base case                              |                         | 105 344                        | 4.99                       |                                          |                                                             | Dominated                            |

|                                           |     |         |       |        |      |                                 |
|-------------------------------------------|-----|---------|-------|--------|------|---------------------------------|
| <b>2: Hh 80%/80%</b>                      | 0.2 | 98 843  | 3.77  |        |      |                                 |
| 6: Screening + cohorting                  |     | 103 075 | 3.61  | 4 232  | 0.16 | 26 450                          |
| 10: Screening + cohorting + ATB reduction |     | 112 565 | 3.49  | 9 490  | 0.12 | 79 083                          |
| 7: Hh 80%/80% + ATB reduction             |     | 107 275 | 3.59  |        |      | Dominated by extended dominance |
| 1: Base case                              |     | 123 231 | 5.90  |        |      | Dominated                       |
| <b>6: Screening + cohorting</b>           | 0.5 | 201 668 | 8.43  |        |      |                                 |
| 10: Screening + cohorting + ATB reduction |     | 216 470 | 8.36  | 14 802 | 0.07 | 211 457                         |
| 2: Hh 80%/80%                             |     | 202 288 | 8.72  |        |      | Dominated                       |
| 1: Base case                              |     | 210 957 | 10.35 |        |      | Dominated                       |
| 7: Hh 80%/80% + ATB reduction             |     | 215 102 | 8.54  |        |      | Dominated                       |

2. Impact of **probability of infection** in patients colonized with ESBL-PE.

Results of sensitivity analysis for a lower and higher probability of infection in colonized ESBL-PE patients versus the basecase analysis are presented in **Supplementary Table S2 A and B**. Overall main results of our analysis were robust to variation in the probability of infection of colonized patients (8% or 30% vs. 16% in our central analysis).

**Supplementary Table S2A** Results of sensitivity analysis. Cost-effectiveness of strategies when **the probability of infection was set at 0.08**.

| Strategy                                           | Total cost/<br>100<br>admissions<br>(€) | Infections/<br>100<br>admissions | Incremental<br>cost/100<br>admissions<br>(ΔC) (€) | Incremental<br>effect (ΔE)<br>(infections<br>avoided/100<br>admissions) | ICER (ΔC/ΔE) (€ / infection avoided) |
|----------------------------------------------------|-----------------------------------------|----------------------------------|---------------------------------------------------|-------------------------------------------------------------------------|--------------------------------------|
| <b>3: Hh 55%/80%</b>                               | 50 550                                  | 1.71                             |                                                   |                                                                         |                                      |
| 2: Hh 80%/80%                                      | 52 428                                  | 1.41                             | 1 878                                             | 0.304                                                                   | 6 178                                |
| 7: Hh 80%/80% + ATB reduction                      | 61 945                                  | 1.33                             | 9 517                                             | 0.079                                                                   | 120 468                              |
| 10: Screening + cohorting + ATB reduction          | 68 673                                  | 1.29                             | 6 728                                             | 0.046                                                                   | 146 261                              |
| 5: Screening + contact precautions                 | 54 930                                  | 2.10                             |                                                   |                                                                         | Dominated                            |
| 1: Base case                                       | 56 792                                  | 2.43                             |                                                   |                                                                         | Dominated                            |
| 8: Hh 55%/80% + ATB reduction                      | 58 173                                  | 1.53                             |                                                   |                                                                         | Dominated by extended dominance      |
| 6: Screening + cohorting                           | 59 424                                  | 1.37                             |                                                   |                                                                         | Dominated by extended dominance      |
| 9: Screening + contact precautions + ATB reduction | 59 706                                  | 1.74                             |                                                   |                                                                         | Dominated                            |
| 4: ATB reduction                                   | 60 360                                  | 1.99                             |                                                   |                                                                         | Dominated                            |

**Supplementary Table S2B** Results of sensitivity analysis. Cost-effectiveness of strategies when **the probability of infection was set at 0.30**.

| Strategy                                           | Total cost/ 100 admissions (€) | Infections/ 100 admissions | Incremental cost/100 admissions ( $\Delta C$ ) (€) | Incremental effect ( $\Delta E$ ) (infections avoided/100 admissions) | ICER ( $\Delta C/\Delta E$ ) (€ / infection avoided) |
|----------------------------------------------------|--------------------------------|----------------------------|----------------------------------------------------|-----------------------------------------------------------------------|------------------------------------------------------|
| <b>2: Hh 80%/80%</b>                               | 126 096                        | 5.29                       |                                                    |                                                                       |                                                      |
| 7: Hh 80%/80% + ATB reduction                      | 131 487                        | 4.99                       | 5 391                                              | 0.300                                                                 | 17 970                                               |
| 10: Screening + cohorting + ATB reduction          | 135 825                        | 4.82                       | 4 338                                              | 0.170                                                                 | 25 518                                               |
| 6: Screening + cohorting                           | 130 896                        | 5.13                       |                                                    |                                                                       | Dominated by extended dominance                      |
| 8: Hh 55%/80% + ATB reduction                      | 137 917                        | 5.72                       |                                                    |                                                                       | Dominated                                            |
| 3: Hh 55%/80%                                      | 140 124                        | 6.43                       |                                                    |                                                                       | Dominated                                            |
| 9: Screening + contact precautions + ATB reduction | 150 335                        | 6.50                       |                                                    |                                                                       | Dominated                                            |
| 5: Screening + contact precautions                 | 164 370                        | 7.85                       |                                                    |                                                                       | Dominated                                            |
| 4: ATB reduction                                   | 164 513                        | 7.48                       |                                                    |                                                                       | Dominated                                            |
| 1: Base case                                       | 183 951                        | 9.13                       |                                                    |                                                                       | Dominated                                            |

3. Impact of **lower compliance with HH** than in the base case scenario.

If the baseline compliance with HH was lower than in our core analysis. e.g. 20% before and 40% after patient contact. HH improvement. e.g. to 50%/60% was confirmed to be cost-saving. Screening + cohorting was the second strategy with an ICER of €3 236/infection avoided vs. HH improvement (**Supplementary Table S3A**).

**Supplementary Table S3A** Results of sensitivity analysis. Cost-effectiveness of strategies when the baseline compliance with **Hand hygiene was set to 20%/40% (instead of 55%/60%)**.

| Strategy                                           | Total cost/ 100 admissions (€) | Infections/ 100 admissions | Incremental cost/100 admissions (ΔC) (€) | Incremental effect (ΔE) (infections avoided/100 admissions) | ICER (ΔC/ΔE) (€ / infection avoided) |
|----------------------------------------------------|--------------------------------|----------------------------|------------------------------------------|-------------------------------------------------------------|--------------------------------------|
| 2: Hh 50%/60%                                      | 81 676                         | 3.14                       |                                          |                                                             |                                      |
| 6: Screening + cohorting                           | 82 867                         | 2.772                      | 1 191                                    | 0.368                                                       | 3 236                                |
| 10: Screening + cohorting + ATB reduction          | 91 134                         | 2.632                      | 8 267                                    | 0.14                                                        | 59 050                               |
| 3: Hh 20%/60%                                      | 85 059                         | 3.758                      |                                          |                                                             | Dominated                            |
| 8: Hh 20%/60% + ATB reduction                      | 87 440                         | 3.284                      |                                          |                                                             | Dominated                            |
| 7: Hh 50%/60% + ATB reduction                      | 88 144                         | 2.891                      |                                          |                                                             | Dominated by extended dominance      |
| 9: Screening + contact precautions + ATB reduction | 93 552                         | 3.741                      |                                          |                                                             | Dominated                            |
| 4: ATB reduction                                   | 95 195                         | 4.075                      |                                          |                                                             | Dominated                            |
| 5: Screening + contact precautions                 | 97 350                         | 4.571                      |                                          |                                                             | Dominated                            |
| 1: Base case Hh 20% 40%                            | 100 905                        | 5.02                       |                                          |                                                             | Dominated                            |

If the baseline compliance with HH was 40% before and 50% after patient contact. HH improvement. e.g. to 60%/70% was confirmed to be cost-saving. Screening + cohorting was the second strategy with an ICER of €546/infection avoided vs. HH improvement (**Supplementary Table S3B**).

**Supplementary Table S3B** Results of sensitivity analysis. Cost-effectiveness of strategies when the baseline compliance with **Hand hygiene was set to 40%/50% (instead of 55%/60%)**.

| Strategy                                                             | Total cost/ 100 admissions (€) | Infections/ 100 admissions | Incremental cost/100 admissions (ΔC) (€) | Incremental effect (ΔE) (infections avoided/100 admissions) | ICER (ΔC/ΔE) (€ / infection avoided) |
|----------------------------------------------------------------------|--------------------------------|----------------------------|------------------------------------------|-------------------------------------------------------------|--------------------------------------|
| 2: Hh 60%/70%                                                        | 84 331                         | 3.191                      |                                          |                                                             |                                      |
| 6: Screening + cohorted staff + contact precautions                  | 84 561                         | 2.77                       | 230                                      | 0.421                                                       | 546                                  |
| 10: Screening + cohorted staff + contact precautions + ATB reduction | 92 803                         | 2.629                      | 8 242                                    | 0.141                                                       | 58 454                               |
| 3: Hh 40%/70%                                                        | 86 359                         | 3.698                      | 0                                        | 0                                                           | Dominated                            |
| 8: Hh 40%/70% + ATB reduction                                        | 89 451                         | 3.26                       | 0                                        | 0                                                           | Dominated                            |
| 7: Hh 60%/70% + ATB reduction                                        | 91 171                         | 2.96                       | 0                                        | 0                                                           | Dominated by extended dominance      |
| 9: Screening + contact precautions + ATB reduction                   | 96 676                         | 3.78                       | 0                                        | 0                                                           | Dominated                            |
| 4: ATB reduction                                                     | 98 264                         | 4.099                      | 0                                        | 0                                                           | Dominated                            |
| 5: Screening + contact precautions                                   | 98 308                         | 4.495                      | 0                                        | 0                                                           | Dominated                            |
| 1: Base case Hh 40%/50%                                              | 102 292                        | 4.949                      | 0                                        | 0                                                           | Dominated                            |



4. Impact of lower **sensitivity to detect ESBL-PE carriage** in screening strategies.

If the sensitivity to detect ESBL-PE on ICU admission was lower than in our core analysis and varied from 80% to 95%. HH 80%/80% (Strategy 2) and HH 80%/80% and antibiotic reduction (Strategy 7) always dominated the screening strategies (Strategy 6 and 10) (**Supplementary Figure S2**).

**Figure S2** Cost-effectiveness plane showing the incremental health benefits (infections avoided) and costs of screening and cohorting strategies relative to the Strategy 2. The sensitivity of detection of ESBL carriers at ICU admission in screening and isolation strategies varied from 80% to 95%. Strategies are: (2) Hand hygiene improvement to 80%/80%; (6) Screening of all admissions and cohorting of identified carriers; (7) Hand hygiene improvement to 80%/80% and Antibiotic reduction; (10) Screening of all admissions. cohorting of identified carriers and Antibiotic reduction.

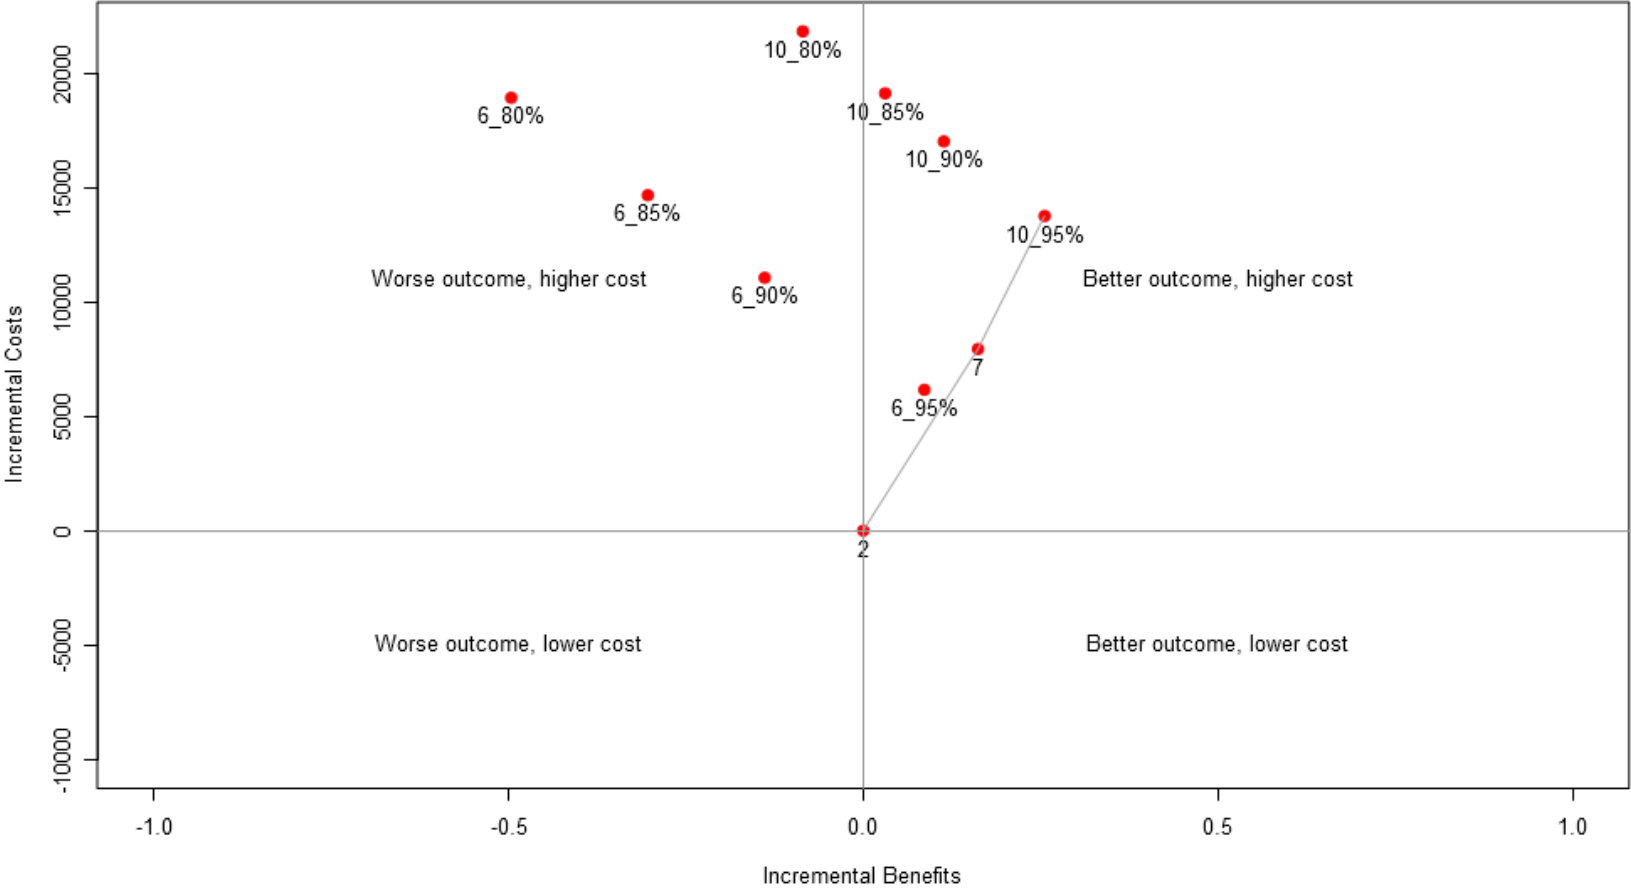

**Supplementary Table S4** Impact of a lower, 30% reduction in antibiotic prescribing.

| Strategy                                                                 | Total cost/ 100 admissions (€) | Infections/ 100 admissions | Incremental cost/100 admissions (ΔC) (€) | Incremental effect (ΔE) (infections avoided/100 admissions) | ICER (ΔC/ΔE) (€ / infection avoided) |
|--------------------------------------------------------------------------|--------------------------------|----------------------------|------------------------------------------|-------------------------------------------------------------|--------------------------------------|
| 2: Hh 80%/80%                                                            | 80 556                         | 2.890                      | 0                                        |                                                             |                                      |
| 7: Hh 80%/80% + ATB reduction 30%                                        | 89 254                         | 2.761                      | 8 698                                    | 0.129                                                       | 67 426                               |
| 10: Screening + cohorted staff + contact precautions + ATB reduction 30% | 95 343                         | 2.680                      | 6 089                                    | 0.081                                                       | 75 173                               |
| 3: Hh 55%/80%                                                            | 84 751                         | 3.514                      | 0                                        |                                                             |                                      |
| 6: Screening + cohorted staff + contact precautions                      | 86 713                         | 2.804                      | 0                                        |                                                             |                                      |
| 8: Hh 55%/80% + ATB reduction 30%                                        | 91 059                         | 3.242                      | 0                                        |                                                             |                                      |
| 5: Screening + contact precautions                                       | 96 716                         | 4.294                      | 0                                        |                                                             |                                      |
| 9: Screening + contact precautions + ATB reduction 30%                   | 97 620                         | 3.720                      | 0                                        |                                                             |                                      |
| 4: ATB reduction 30%                                                     | 104 271                        | 4.285                      | 0                                        |                                                             |                                      |
| 1: Base case                                                             | 105 344                        | 4.989                      | 0                                        |                                                             |                                      |

**Supplementary Table S5A** Impact of infection control nurse’s time working on the hand hygiene program and the level of hand hygiene achieved on model predictions compared to the Base case strategy. The cost-effective ratio (CER) was calculated when the hand hygiene strategy was more expensive but more effective than the base case.

| Level of hand hygiene before contact with patient (%) | Level of hand hygiene after contact with patient (%) | Mean increase in hand hygiene from baseline (%) | Number of infections /100 admissions | Total cost /100 admissions (€) | CER (vs base case)                     |
|-------------------------------------------------------|------------------------------------------------------|-------------------------------------------------|--------------------------------------|--------------------------------|----------------------------------------|
| <b>Base case</b>                                      |                                                      |                                                 |                                      |                                |                                        |
| 55                                                    | 60                                                   | -                                               | 4.99                                 | 105 344                        | -                                      |
| <b>ICN working on Hh program at 1/4 time</b>          |                                                      |                                                 |                                      |                                |                                        |
| 55                                                    | 60                                                   | 0.0                                             | 4.99                                 | 112 783                        | Hh strategy dominated by the Base case |
| 60                                                    | 60                                                   | 2.5                                             | 4.65                                 | 106 497                        | 3 433                                  |
| 55                                                    | 65                                                   | 2.5                                             | 4.64                                 | 106 366                        | 2 965                                  |
| 60                                                    | 65                                                   | <b>5.0</b>                                      | 4.29                                 | 99 722                         | Base case dominated by the Hh strategy |
| ⋮                                                     | ⋮                                                    | ⋮                                               | ⋮                                    | ⋮                              | Base case dominated by the Hh strategy |
| 80                                                    | 80                                                   | 22.5                                            | 2.89                                 | 74 103                         | Base case dominated by the Hh strategy |
| <b>ICN working on Hh strategy at 1/2 time</b>         |                                                      |                                                 |                                      |                                |                                        |
| 55                                                    | 60                                                   | 0.0                                             | 4.99                                 | 120 222                        | Hh strategy dominated by the Base case |
| 60                                                    | 60                                                   | 2.5                                             | 4.65                                 | 113 789                        | 25 146                                 |
| 55                                                    | 65                                                   | 2.5                                             | 4.64                                 | 113 675                        | 24 160                                 |
| 60                                                    | 65                                                   | 5.0                                             | 4.29                                 | 106 861                        | 2 182                                  |
| 65                                                    | 65                                                   | <b>7.5</b>                                      | 4.02                                 | 101 484                        | Base case dominated by the Hh strategy |
| ⋮                                                     | ⋮                                                    | ⋮                                               | ⋮                                    | ⋮                              | Base case dominated by the Hh strategy |
| 80                                                    | 80                                                   | 22.5                                            | 2.89                                 | 80 556                         | Base case dominated by the Hh strategy |
| <b>ICN working on Hh strategy at full time</b>        |                                                      |                                                 |                                      |                                |                                        |
| 55                                                    | 60                                                   | 0.0                                             | 4.99                                 | 135 100                        | Hh strategy dominated by the Base case |
| 60                                                    | 60                                                   | 2.5                                             | 4.65                                 | 128 375                        | 68 573                                 |
| 55                                                    | 65                                                   | 2.5                                             | 4.64                                 | 128 292                        | 66 551                                 |
| 60                                                    | 65                                                   | 5.0                                             | 4.29                                 | 121 137                        | 22 712                                 |
| 65                                                    | 65                                                   | 7.5                                             | 4.02                                 | 115 442                        | 10 397                                 |

|    |    |             |      |         |                                        |
|----|----|-------------|------|---------|----------------------------------------|
| 55 | 70 | 5.0         | 4.22 | 119 423 | 18 278                                 |
| 60 | 70 | 7.5         | 3.98 | 114 488 | 9 029                                  |
| 65 | 70 | 10.0        | 3.75 | 110 092 | 3 823                                  |
| 70 | 70 | 12.5        | 3.53 | 105 942 | 411                                    |
| 55 | 75 | 7.5         | 3.85 | 111 932 | 5 806                                  |
| 60 | 75 | 10.0        | 3.68 | 108 574 | 2 468                                  |
| 65 | 75 | 12.5        | 3.51 | 105 357 | 9                                      |
| 70 | 75 | <b>15.0</b> | 3.32 | 101 754 | Base case dominated by the Hh strategy |
| ⋮  | ⋮  | ⋮           | ⋮    | ⋮       | Base case dominated by the Hh strategy |
| 80 | 80 | 22.5        | 2.89 | 93 462  | Base case dominated by the Hh strategy |

**Supplementary Table S5B** Impact of infection control nurse's time working on the hand hygiene strategy and the level of hand hygiene achieved on model predictions compared to the Screening and cohorting strategy. The cost-effective ratio (CER) was calculated when the screening and cohorting strategy was more expensive but more effective than the hand hygiene.

| Level of hand hygiene before contact with patient (%) | Level of hand hygiene after contact with patient (%) | Mean increase in hand hygiene from baseline (%) | Number of infections/100 admissions | Total cost/100 admissions (€) | CER (vs Hand hygiene strategy)                   |
|-------------------------------------------------------|------------------------------------------------------|-------------------------------------------------|-------------------------------------|-------------------------------|--------------------------------------------------|
| <b>Screening and cohorting</b>                        |                                                      |                                                 |                                     |                               |                                                  |
| 55 (with non cohorted patients)                       | 60 (with non cohorted patients)                      |                                                 | 2.80                                | 86 713                        |                                                  |
| <b>ICN working on Hh strategy at 1/4 time</b>         |                                                      |                                                 |                                     |                               |                                                  |
| 55                                                    | 60                                                   | 0.0                                             | 4.99                                | 112 783                       | Hh strategy dominated by Screening and cohorting |
| ⋮                                                     | ⋮                                                    | ⋮                                               | ⋮                                   | ⋮                             | Hh strategy dominated by Screening and cohorting |
| 70                                                    | 70                                                   | 12.5                                            | 3.53                                | 85 621                        | 1 496                                            |
| 55                                                    | 75                                                   | 7.5                                             | 3.85                                | 91 212                        | Hh strategy dominated by Screening and cohorting |
| 60                                                    | 75                                                   | 10.0                                            | 3.68                                | 88 104                        | Hh strategy dominated by Screening and cohorting |
| 65                                                    | 75                                                   | 12.5                                            | 3.51                                | 85 102                        | 2 283                                            |
| 70                                                    | 75                                                   | 15.0                                            | 3.32                                | 81 748                        | 9 554                                            |
| 75                                                    | 75                                                   | 17.5                                            | 3.15                                | 78 568                        | 23 561                                           |
| 55                                                    | 80                                                   | 10.0                                            | 3.51                                | 84 751                        | 2 763                                            |
| 60                                                    | 80                                                   | 12.5                                            | 3.38                                | 82 408                        | 7 507                                            |
| 65                                                    | 80                                                   | 15.0                                            | 3.24                                | 79 993                        | 15 442                                           |
| 70                                                    | 80                                                   | 17.5                                            | 3.12                                | 77 946                        | 28 012                                           |
| 75                                                    | 80                                                   | 20.0                                            | 2.99                                | 75 742                        | 58 203                                           |
| 80                                                    | 80                                                   | 22.5                                            | 2.89                                | 74 103                        | 146 278                                          |
| <b>ICN working on Hh strategy at 1/2 time</b>         |                                                      |                                                 |                                     |                               |                                                  |
| 55                                                    | 60                                                   | 0.0                                             | 4.99                                | 120 222                       | Hh strategy dominated by Screening and cohorting |
| ⋮                                                     | ⋮                                                    | ⋮                                               | ⋮                                   | ⋮                             | Hh strategy dominated by Screening and cohorting |
| 75                                                    | 75                                                   | 17.5                                            | 3.15                                | 85 136                        | 4 561 €                                          |

|                                                |    |      |      |         |                                                  |
|------------------------------------------------|----|------|------|---------|--------------------------------------------------|
| 55                                             | 80 | 10.0 | 3.51 | 91 498  | Hh strategy dominated by Screening and cohorting |
| 60                                             | 80 | 12.5 | 3.38 | 89 094  | Hh strategy dominated by Screening and cohorting |
| 65                                             | 80 | 15.0 | 3.24 | 86 608  | Hh strategy dominated by Screening and cohorting |
| 70                                             | 80 | 17.5 | 3.12 | 84 516  | 7 023 €                                          |
| 75                                             | 80 | 20.0 | 2.99 | 82 227  | 23 801 €                                         |
| 80                                             | 80 | 22.5 | 2.89 | 80 556  | 71 424 €                                         |
| <b>ICN working on Hh strategy at full time</b> |    |      |      |         |                                                  |
| 55                                             | 60 | 0.0  | 4.99 | 135 100 | Hh strategy dominated by Screening and cohorting |
| ⋮                                              | ⋮  | ⋮    | ⋮    | ⋮       | Hh strategy dominated by Screening and cohorting |
| 80                                             | 80 | 22.5 | 2.89 | 93 462  | Hh strategy dominated by Screening and cohorting |

**Supplementary Figure S3** Results of probabilistic sensitivity analysis. Cost-effectiveness plane shows the incremental health benefits (infections avoided) and costs for Screening and cohorting (Strategy 6). relative to horizontal strategies: A) Hand hygiene improvement to 80%/80% (Strategy 2); B) Hand hygiene improvement to 55%/80% (Strategy3); C) Antibiotic reduction (Strategy 4). The frequency that the Strategy 6 was in one of four quadrant of CE plane is represented by “p”.

A)

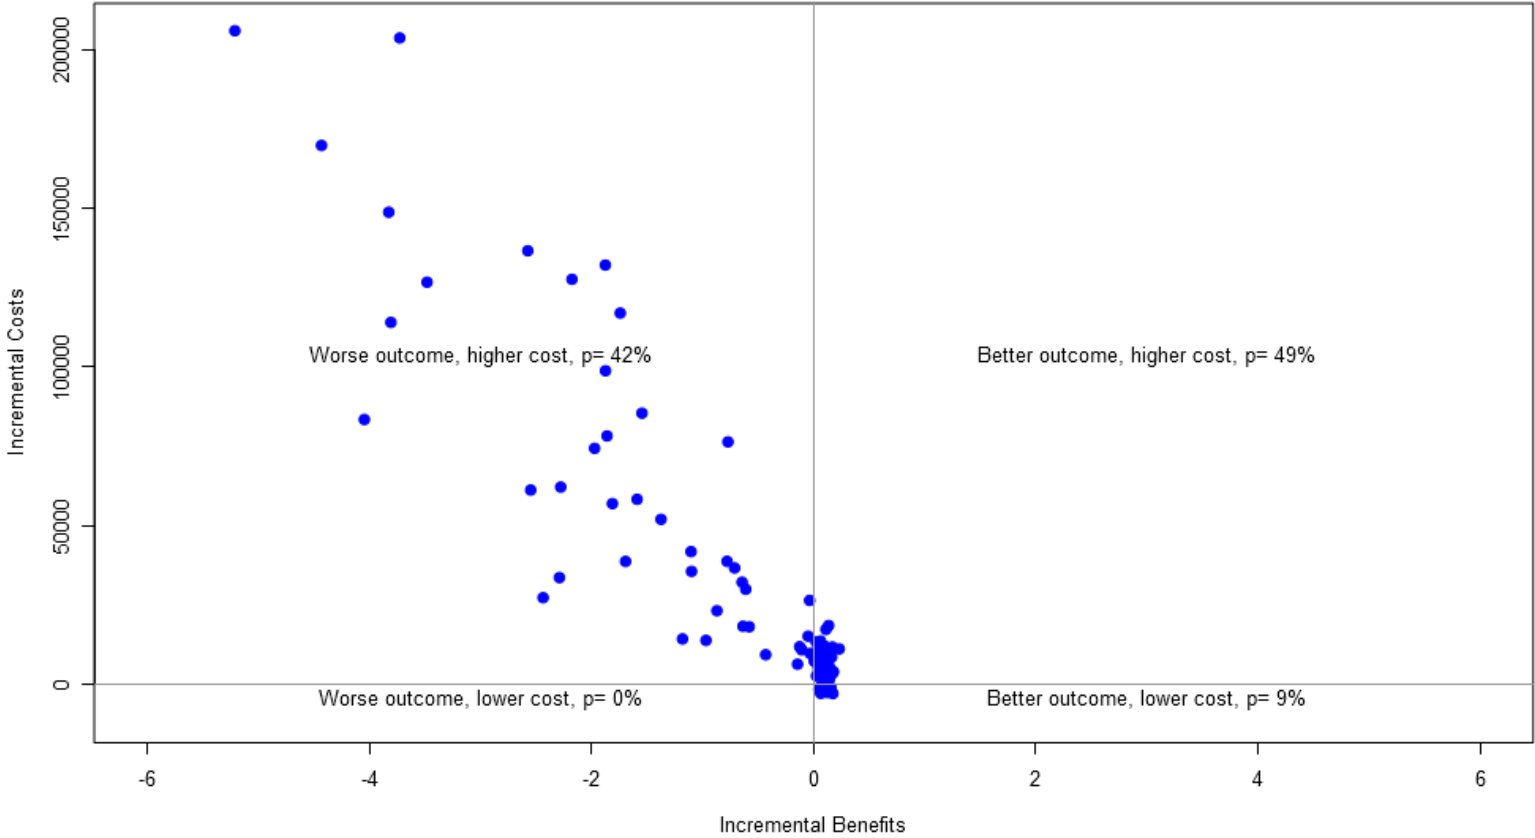



B)

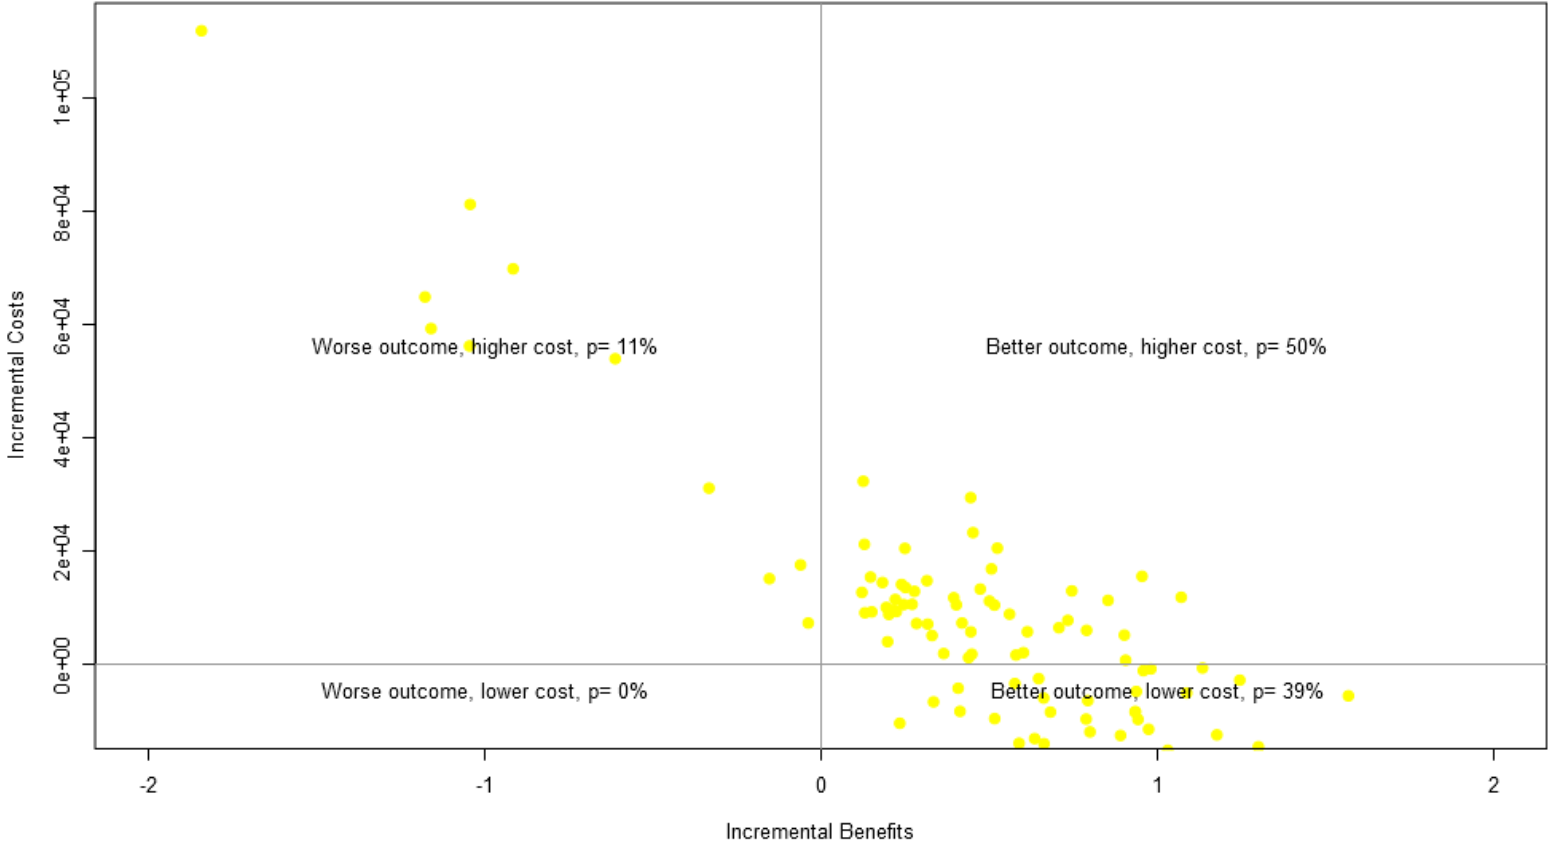

c)

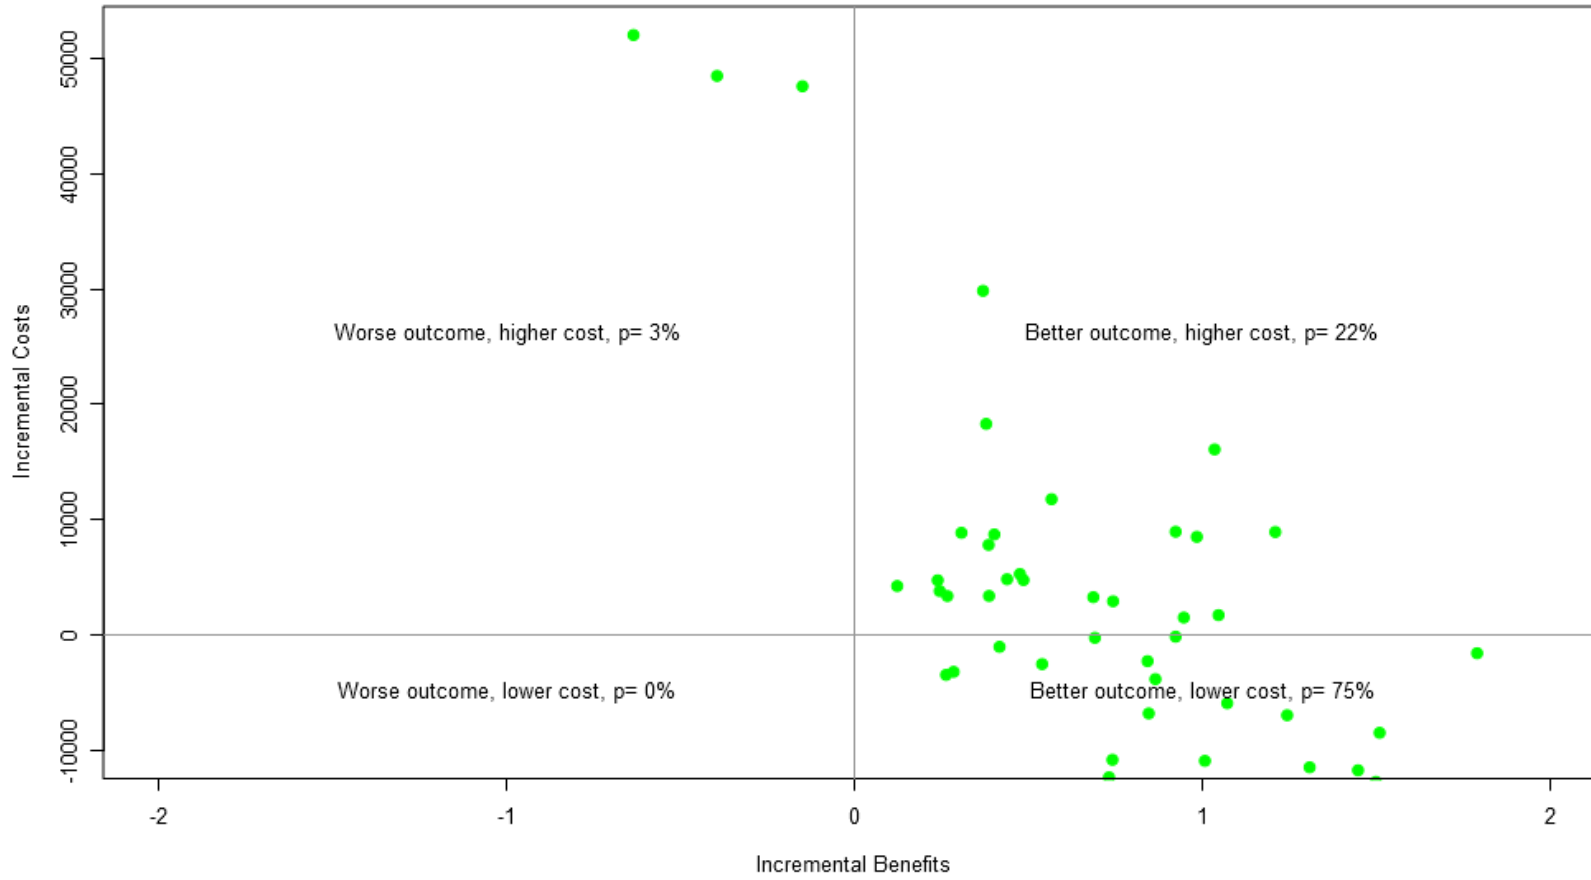

**Supplementary Figure S4** Results of probabilistic sensitivity analysis. Cost-effectiveness plane shows the incremental health benefits (infections avoided) and costs for Screening and contact precautions (Strategy 5). relative to horizontal strategies: A) Hand hygiene improvement to 80%/80% (Strategy 2); B) Hand hygiene improvement to 55%/80% (Strategy3); C) Antibiotic reduction (Strategy 4). The frequency that the Strategy 6 was in one of four quadrant of CE plane is represented by “p”.

A)

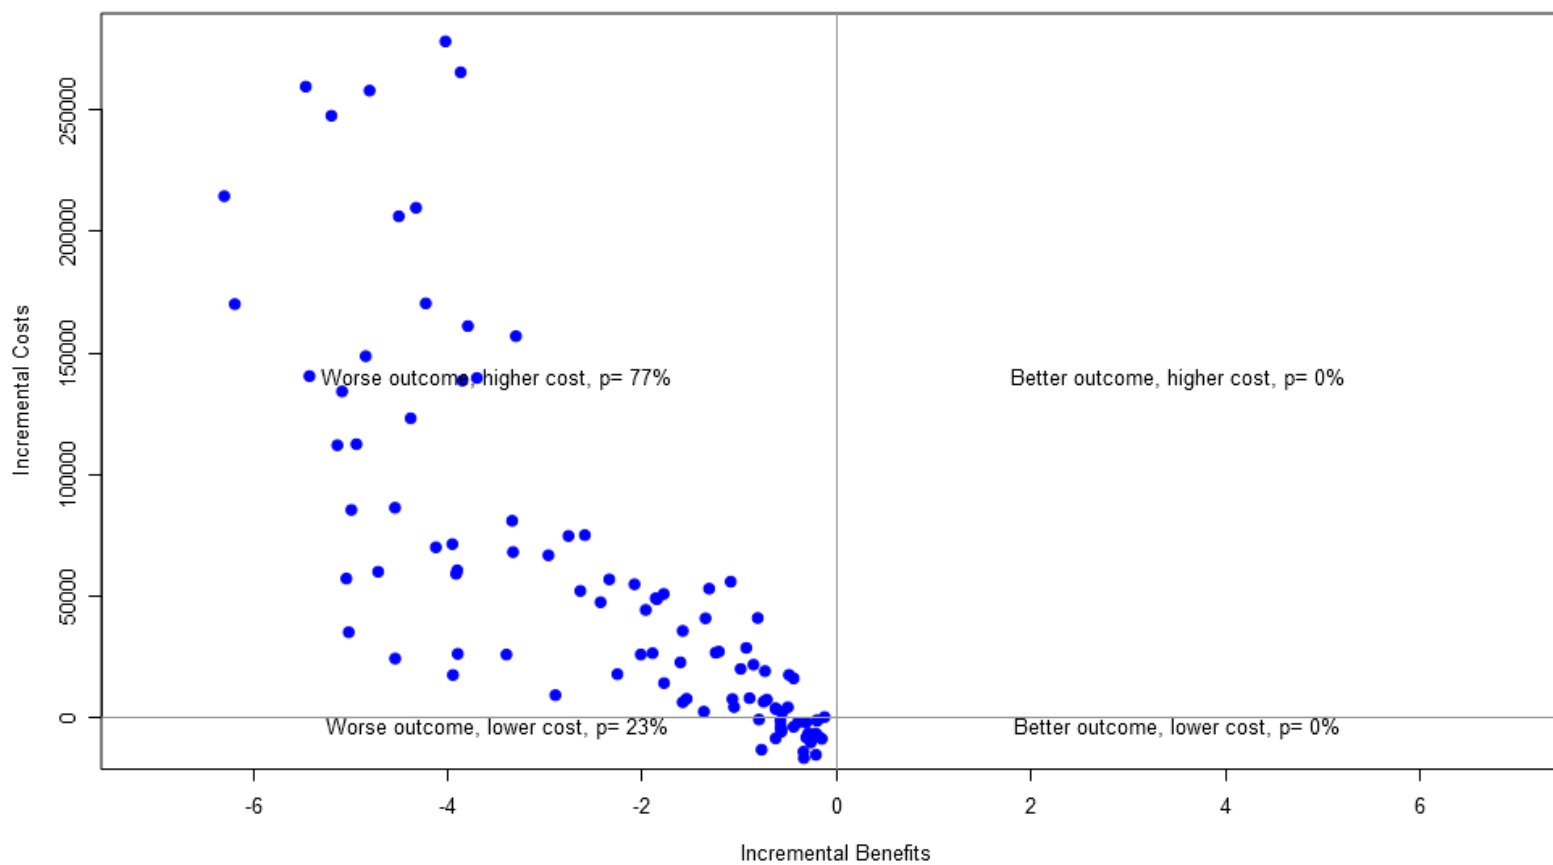

B)

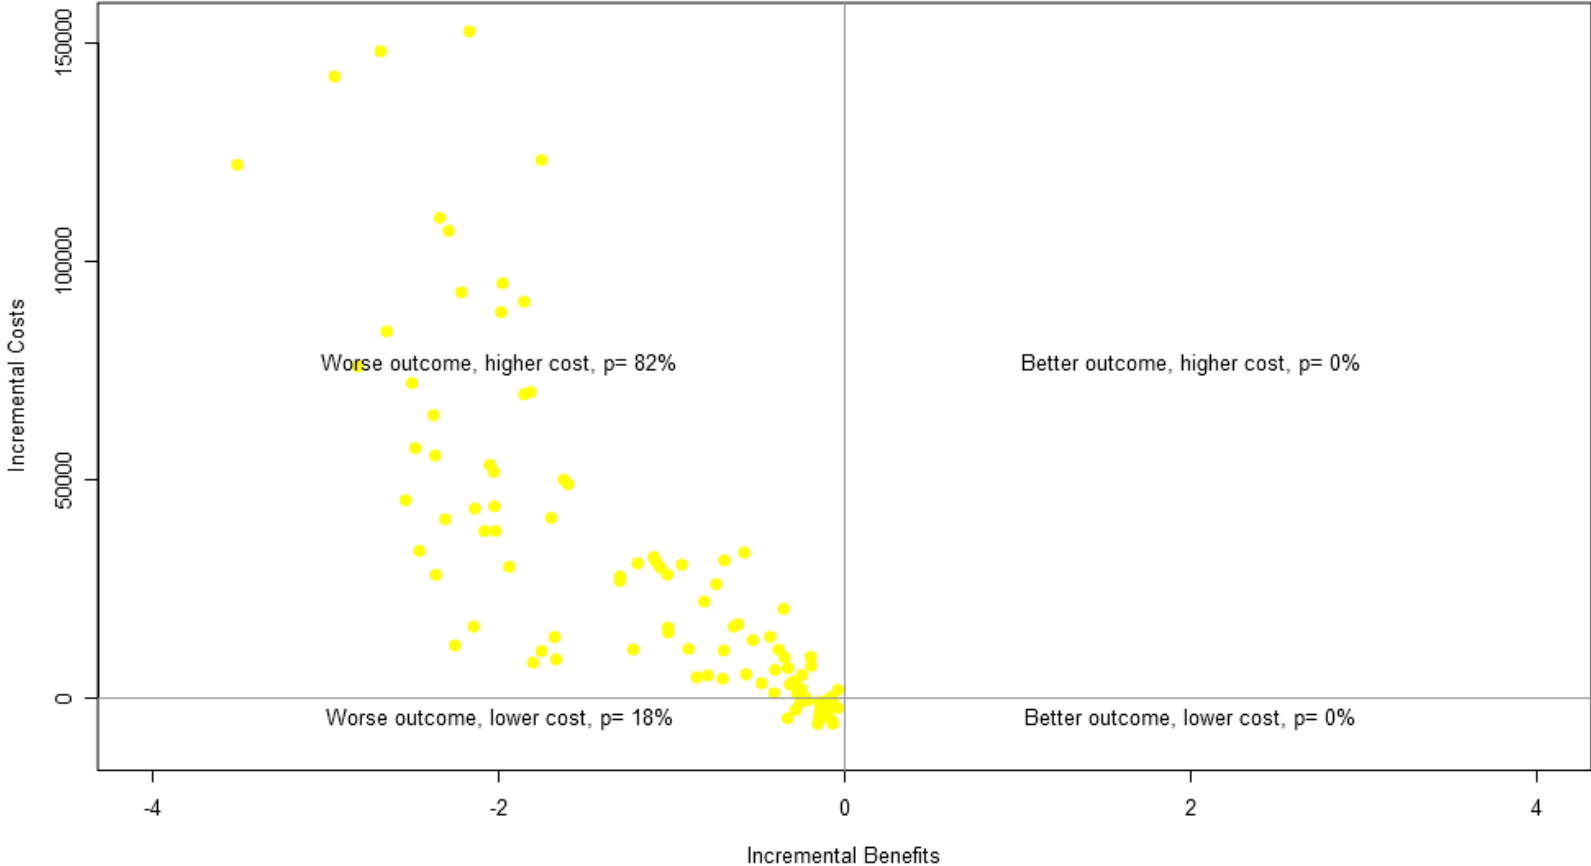

c)

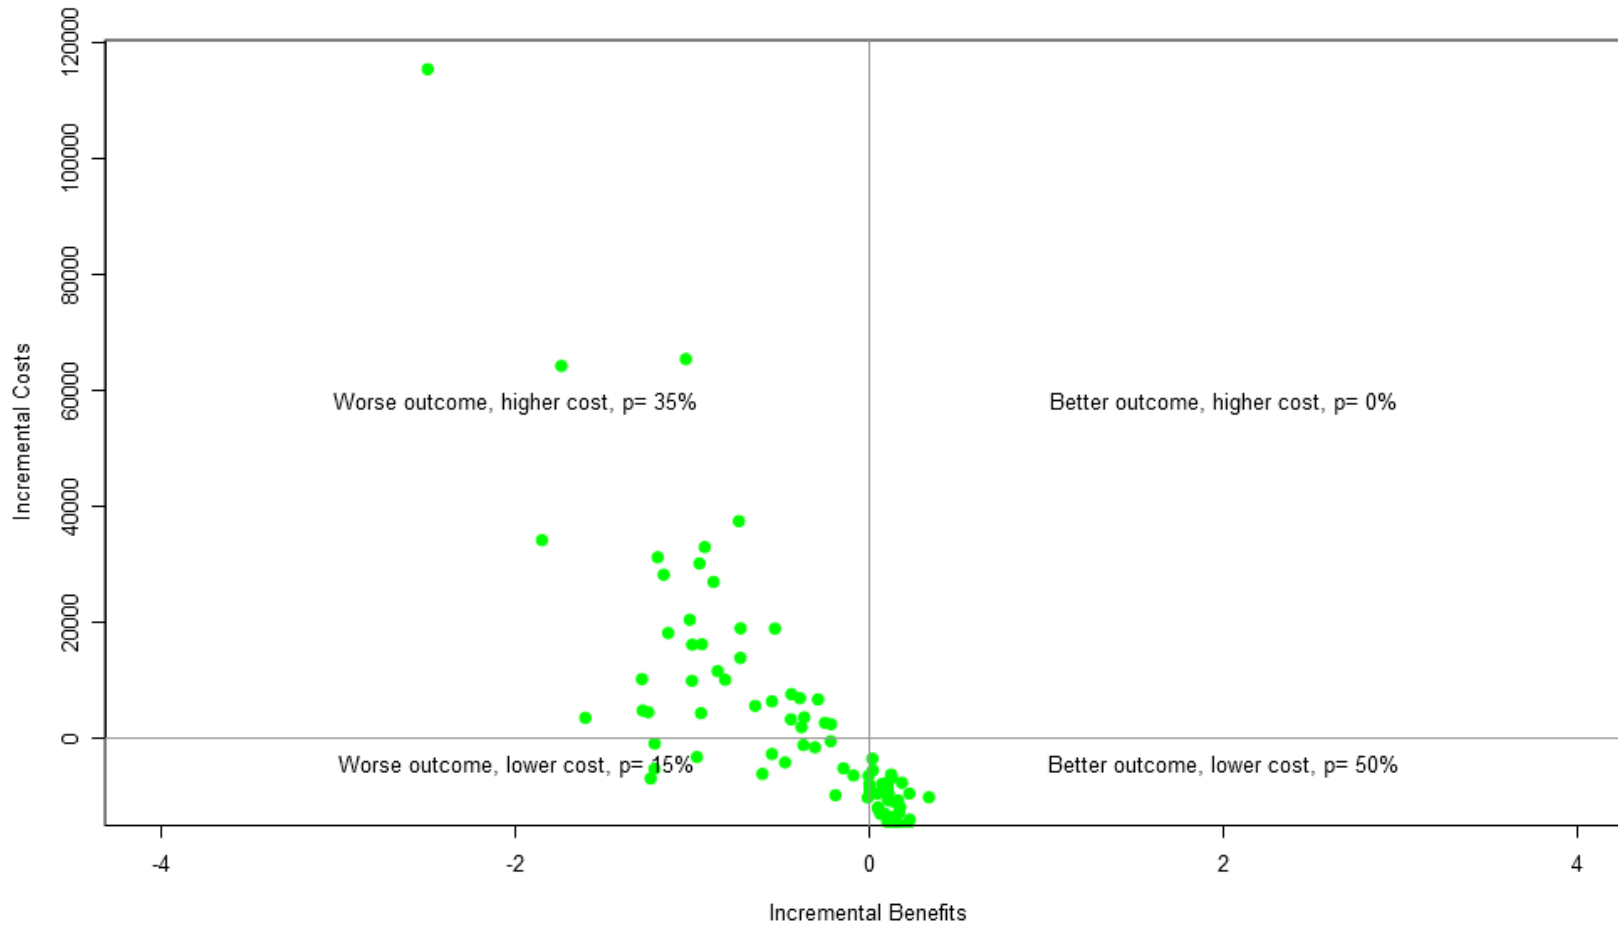

Supplement: bmjopen-2017-017402supp002.pdf [file bmjopen-2017-017402supp002.pdf]
