# Supplementary material for: Universal or targeted approach to prevent the transmission of extended-spectrum beta-lactamase-producing Enterobacteriaceae in intensive care units: a cost-effectiveness analysis
Source: PubMed Central journal article supplement — BMJ Open. 2017 Nov 3;7(11):e017402. doi: 10.1136/bmjopen-2017-017402 (PMC5722099; doi:10.1136/bmjopen-2017-017402), 2017-11-03
Supplement: bmjopen-2017-017402supp001.pdf [file bmjopen-2017-017402supp001.pdf]

## Supplementary material

### Supplementary Text S1

| <b>Defining the objectives, scope and policy context of a model.</b> |                                                                                                                                                                                                          |
|----------------------------------------------------------------------|----------------------------------------------------------------------------------------------------------------------------------------------------------------------------------------------------------|
| Decision objective                                                   | To evaluate ESBL-PE control strategies                                                                                                                                                                   |
| Policy context                                                       | This analysis was used to support decision makers in choosing the best strategy for controlling ESBL-PE                                                                                                  |
| Funding source                                                       | PREPS Program*, Inserm**                                                                                                                                                                                 |
| Disease                                                              | ESBL-PE infections                                                                                                                                                                                       |
| Perspective                                                          | Hospital perspective                                                                                                                                                                                     |
| Target population                                                    | ICU patients                                                                                                                                                                                             |
| Health benefits                                                      | Reduction in ESBL-PE infections                                                                                                                                                                          |
| Strategies                                                           | Universal strategies (hand hygiene improvement or antibiotic reduction)<br><br>Targeted strategies (screening of patients on ICU admission and contact precaution in contact with carriers or cohorting) |
| Resources/costs                                                      | Staff time working on the program, materials                                                                                                                                                             |
| Time horizon                                                         | 1 year                                                                                                                                                                                                   |
| *PREPS - French government's program on Care System Performance      |                                                                                                                                                                                                          |
| **Inserm- National Institute for Health and Medical Research         |                                                                                                                                                                                                          |

## Transmission model

We have used an extended version of a previously developed compartmental, dynamic, stochastic model to simulate the transmission of ESBL-PE in a hypothetical ICU with 10 single-bed rooms among patients through contacts with healthcare workers (HCWs)<sup>1</sup>.

For each simulation, we introduced a single unidentified ESBL-PE carrier receiving antibiotics within the ward and simulated the ESBL-PE dynamics for one year. In this version of the model, following the first admitted colonized patient,  $\phi$  was the fraction of admitted patients assumed to be colonized with ESBL-PE. Patients are discharged at rate  $\gamma$  or die at rate  $\nu$  but bed occupancy is assumed to be 100% (the population of patients in the ward is constant).

Patients may or may not receive antibiotics at admission; antibiotics are initiated during the patient's stay at rate  $\tau$  per day and antibiotics are discontinued at rate  $\theta$  per day.

In the model, all patients were classified as 1) uncolonized receiving antibiotics ( $S_{p,a}$ ) or not ( $S_{p,n}$ ), 2) unidentified ESBL-PE carriers receiving antibiotics ( $C_{p,a}$ ) or not ( $C_{p,n}$ ) (**Figure 1A**). Antibiotics in the model acted in two ways: 1) increased the risk of becoming colonized for uncolonized patients receiving antibiotics; and 2) increased the risk of transmission from colonized patients receiving antibiotics.

Initially uncontaminated HCWs ( $S_h$ ) can become transiently contaminated (and go to the compartment  $C_h$ ) after contact with a colonized patient ( $C_{p,n}$  or  $C_{p,a}$ ).

### Mathematical model under targeted infection control measures

The model was modified to account for the effect of targeted control measures. To detect ESBL-PE carriers, we simulated the screening of patients at ICU admission. We assumed that the screening method had 95% sensitivity and 100% specificity. Thus in the model, all patients were classified as 1) uncolonized receiving antibiotics ( $S_{p,a}$ ) or not ( $S_{p,n}$ ), 2) unidentified ESBL-PE carriers receiving antibiotics ( $C_{p,a}$ ) or not ( $C_{p,n}$ ), and 3) identified ESBL-PE carriers receiving antibiotics ( $I_{p,a}$ ) or not ( $I_{p,n}$ ) (**Figure 1B**).

### Model parameters

Exposure to antibiotics has been associated with increased probability of colonization for uncolonized patients<sup>2,3</sup> and of transmission from colonized patients to HCWs<sup>4-6</sup>. Thus, we hypothesized that: 1) the colonization probability after contact with a contaminated HCW was higher in patients on antibiotics than in untreated patients ( $b_{p,a} > b_{p,n}$ ), 2) the probability of contamination of an HCW through contact with a colonized patient was higher if the patient was treated with antibiotics ( $b_{h,a} > b_{h,n}$ ).

The transmission parameter  $\beta$  depends on the rate of HCW visits followed by contacts with the patient ( $a$ ), the probability of ESBL-PE bacteria transmission per infectious contact ( $b_{..}$ ), and the compliance with hand hygiene (HH) ( $p_p$  and  $p_h$ ).

The risk of transmission from an unidentified ESBL-PE carrier to n HCW might differ from that of an identified ESBL-PE carrier, because of the implementation of targeted control measures.

Firstly, we modelled the implementation of contact precautions (improvement of HH) in contacts with identified ESBL-PE carriers. HH for other patients was maintained at baseline level.

The transmission parameters were defined as follows:

$$\begin{array}{ll}
 \beta_{p,a} = a \cdot b_{p,a} \cdot (1 - p_p) & \left. \vphantom{\beta_{p,a}} \right\} \\
 \beta_{p,n} = a \cdot b_{p,n} \cdot (1 - p_p) & \text{Transmission from contaminated HCWs to} \\
 & \text{uncolonized patients (receiving antibiotics or not)} \\
 \\
 \beta_{h,a} = a \cdot b_{h,a} \cdot (1 - p_h) & \left. \vphantom{\beta_{h,a}} \right\} \\
 \beta_{h,n} = a \cdot b_{h,n} \cdot (1 - p_h) & \text{Transmission from non-identified, colonized} \\
 & \text{patients (receiving antibiotics or not) to HCWs} \\
 \\
 \beta_{h,a,I} = a \cdot b_{h,a,I} \cdot (1 - p_{h,I,S}) & \left. \vphantom{\beta_{h,a,I}} \right\} \\
 \beta_{h,n,I} = a \cdot b_{h,n,I} \cdot (1 - p_{h,I,S}) & \text{Transmission from identified, colonized} \\
 & \text{patients (receiving antibiotics or not) to HCWs}
 \end{array}$$

Secondly, we modelled the introduction of a dedicated HCW to interact only with identified, colonized patients. The transmission parameters were defined as follows:

$$\begin{array}{ll}
 \beta_{p,a} = a \cdot b_{p,a} \cdot (1 - p_p) & \left. \vphantom{\beta_{p,a}} \right\} \\
 \beta_{p,n} = a \cdot b_{p,n} \cdot (1 - p_p) & \text{Transmission from contaminated HCWs to} \\
 & \text{uncolonized patients (receiving antibiotics or not)} \\
 \\
 \beta_{h,a} = a \cdot b_{h,a} \cdot (1 - p_h) & \left. \vphantom{\beta_{h,a}} \right\} \\
 \beta_{h,n} = a \cdot b_{h,n} \cdot (1 - p_h) & \text{Transmission from non-identified, colonized} \\
 & \text{patients (receiving antibiotics or not) to HCWs} \\
 \\
 \beta_{h,a,I} = 0 & \left. \vphantom{\beta_{h,a,I}} \right\} \\
 \beta_{h,n,I} = 0 & \text{Transmission from identified, colonized} \\
 & \text{patients (receiving antibiotics or not) to HCWs} \\
 & \text{(other than the dedicated HCW)}
 \end{array}$$

Once colonized, patients do not clear ESBL-PE colonization before discharge. HCWs are transiently contaminated and they become decontaminated either by performing HH or after a mean waiting time of one hour.

The model parameters and their values are presented in **Supplementary Table 1**. Parameter values were derived from multicentre studies if available, and by default based on best evidence from the literature or expert opinion.

We modelled an ICU with 10 single-rooms with continuous presence of 6 HCWs<sup>8</sup>. We assumed 100% bed occupancy. Consequently, a shorter length of stay (LOS) implies a higher turnover and possible admission of colonized patients<sup>9</sup>. As reported recently, the ICU LOS of ESBL-PE carriers is longer (13 days) than uncolonized patients (5 days)<sup>10</sup>. The extended LOS in ESBL-PE carriers increases the colonization pressure in the ICU, consequently increasing the risk of cross-transmission.

When targeted control strategies were used, colonization was detected using a screening method assuming that screening results were instantaneous. We assumed that the sensitivity of the screening method was 95%<sup>11</sup>. Screening results had 100% specificity.

### **Costs of control strategies**

We estimated the costs of control strategies over the one-year simulation period. See **Table 1** for details on cost parameters.

We used gamma distribution to represent uncertainty in cost parameters. Cost data are constrained to be non-negative and gamma distribution is often used in decision modelling. To estimate the parameters of the gamma distribution to cost data, we used the method of moments.

When data were available from the hospital data base, e.g. cost of ICU bed-day, we performed a

goodness of fit test (Kolmogorov-Smirnov) to assure that a random sample comes from a gamma distribution. The test was performed using **R** software.

The cost of the base case strategy (reference strategy) was considered to be the cost of HH at baseline level, namely cost of the alcohol-based hand rub and costs associated with the time HCWs required for hand disinfection.

As reported recently, the highest cost of an HH program arose from the time people spent working on the program<sup>12</sup>. We therefore assumed that the cost of an HH improvement strategy included the cost of HH (hand-rub and HCWs' time) and the cost of an infection control nurse working on the program, i.e. HH education, observation and feedback<sup>12,13</sup>. We assumed (based on expert opinion) that improving hand HH compliance to 55/80% and to 80/80% required respectively a quarter and a half of the working time of an infection control nurse. In accordance with staffing practices common in the European Union, we assumed that one staff position requires the recruitment of three nurses<sup>14</sup>.

Antibiotic stewardship programs (ASPs) have proven efficient in reducing antibiotic use and antibiotic duration in hospitals<sup>15-17</sup>. Interventions included in ASPs require additional resources associated with higher costs<sup>18</sup>. One of the resources needed and associated with the highest costs is the staff time<sup>19</sup>. We calculated the cost of an action to reduce antibiotic use as the cost of a half-time infectious disease physician working on the ASP. This assumption was based on expert opinion. The cost of antibiotics is considered to be marginal and was not considered in our study<sup>17</sup>.

The cost of screening was first based on the cost of testing materials and on the cost of laboratory technician time spend on a rapid screening test (e.g. PCR).

For the strategy in which screening at admission was combined with contact precautions for identified ESBL-PE carriers, we also included the cost of contact precautions such as the cost of improved HH (i.e. the cost of the alcohol-based hand rub), and the costs associated with the time HCWs required for hand disinfection. Here we did not consider the cost of an infection control nurse. We hypothesized that knowing that the patient is an ESBL-PE carrier, HCWs would adhere more easily to HH.

For the strategy in which screening on admission was combined with cohorting of identified ESBL-PE patients, the cost of cohorting was the cost of contact precautions and the cost of additional HCWs caring for cohorted patients (based on expert opinion). For screening interventions, the cost of HH in non-carriers and unidentified carriers was considered to be identical to the costs of the baseline level.

#### **Cost of hospital-acquired infections**

The mean cost of an ICU bed-day was estimated at €1,583 (based on the average amount paid in 2015 for ICUs in Paris public hospitals (AP-HP). This amount is based on French Diagnosis-Related Groups and complementary revenues specific to ICU units and divided by the mean length of stay in ICUs in 2015<sup>20</sup>. Based on published reports, the cost per day of a patient with ESBL-PE infection was 50% higher than the cost of an uninfected patient<sup>21,22</sup>. The cost of an ESBL-PE infection was estimated using the ESBL-PE-attributable LOS and the cost of a hospital bed-day for infected patients<sup>23,24</sup>.

## Model calibration

The model was simulated stochastically. We calibrated the colonization and contamination parameters using Monte Carlo methods in order to reproduce the observed 12.9% acquisition rate in an ICU after a 6-month period<sup>7</sup>.

## Model simulations and outcomes

Simulations of the model were performed using Gillespie's method and programmed in C++ language. The outcomes were calculated after a period of 1 year and averaged over the 1,000 Monte Carlo simulations. Cost-effectiveness analysis and graphics were performed in R<sup>25</sup>.

## TABLES

**Supplementary Table 1.** Base case values and ranges for probabilistic sensitivity analysis of input parameters used in the compartmental model of ESBL-PE transmission.

**Comment.** As can be seen, for some parameters the ranges for a sensitivity analysis are omitted (e.g.  $d_{ATB,S}$ ). This is because these parameters are specific to a strategy (e.g. Atb reduction) and must be fixed in sensitivity analysis to allow the comparison of outcomes with other strategies.

| Parameter | Description                                                                   | Value | Source           | Sensitivity analysis                            |                         |
|-----------|-------------------------------------------------------------------------------|-------|------------------|-------------------------------------------------|-------------------------|
|           |                                                                               |       |                  | Range                                           | Distribution            |
| $N_p$     | Number of beds                                                                | 10    | <sup>26</sup>    |                                                 |                         |
| $N_h$     | Number of HCWs                                                                | 6     | <sup>27</sup>    |                                                 |                         |
| $C_p$     | Number of HCW visits associated with at least one aseptic contact per patient | 81    | <sup>28-30</sup> | 13.8 <sup>31</sup> -<br>160 <sup>28,32,33</sup> | triangular (peak at 81) |



|           |                                                                                                                         |        |                                                    |                    |                             |
|-----------|-------------------------------------------------------------------------------------------------------------------------|--------|----------------------------------------------------|--------------------|-----------------------------|
|           | per day                                                                                                                 |        |                                                    |                    |                             |
| a         | Number of HCW visits associated with at least one aseptic contact per HCW per day                                       | 13.5   | $c_p/N_h$                                          |                    |                             |
| $b_{p,n}$ | Colonization probability for patients not receiving antibiotics                                                         | 0.0127 | Calibrated, consistent with data from <sup>7</sup> | 0-0.1              | triangular (peak at 0.0127) |
| $b_{p,a}$ | Colonization probability for patients receiving antibiotics                                                             | 0.0530 |                                                    | $b_{p,n}-0.5$      | uniform                     |
| $b_{h,n}$ | Probability of contamination of an HCW with ESBL-PE during a contact with a colonized patient not receiving antibiotics | 0.0379 | Calibrated, consistent with data from <sup>7</sup> | 0-0.6              | triangular (peak at 0.0379) |
| $b_{h,a}$ | Probability of contamination of an HCW during a contact with a colonized patient receiving antibiotics                  | 0.3198 | Calibrated, consistent with data from <sup>7</sup> | $b_{h,n}-0.8$      | uniform                     |
| $d_s$     | Mean length of stay of uncolonized patients (days)                                                                      | 5      | <sup>10</sup>                                      | 3-9 <sup>10</sup>  | triangular (peak at 5)      |
| $d_c$     | Mean length of stay of colonized patients (days)                                                                        | 13     | <sup>10</sup>                                      | 6-26 <sup>10</sup> | triangular (peak at 13)     |
|           |                                                                                                                         |        |                                                    |                    |                             |

|             |                                                                        |        |                  |                    |                             |
|-------------|------------------------------------------------------------------------|--------|------------------|--------------------|-----------------------------|
| $d_{Is}$    | Mean length of stay of isolated patients (days)                        | 13     | <sup>10</sup>    | 6-26 <sup>10</sup> | triangular (peak at 13)     |
| $\gamma_s$  | Discharge rate of uncolonized patients (/day)                          | 0.2    | $1/d_s$          |                    |                             |
| $\gamma_c$  | Discharge rate of colonized patients (/day)                            | 0.0154 | $1/d_c$          |                    |                             |
| $\nu$       | Death rate of patients (/day)                                          | 0.0027 | <sup>10</sup>    | 0.00135-0.0054     | triangular (peak at 0.0027) |
| $\mu_0$     | Natural decontamination rate for HCW (i.e. not by hand hygiene) (/day) | 24     | <sup>31,34</sup> | 12-48              | triangular (peak at 24)     |
| $\psi$      | Prevalence of antibiotic therapy among admitted patients               | 0.56   | <sup>35,36</sup> | 0.2-0.9            | triangular (peak at 0.56)   |
| $\tau$      | Antibiotic initiation rate (/day)                                      | 0.1    | assumed          | 0.05-0.2           | triangular (peak at 0.1)    |
| $d_{ATB,S}$ | Antibiotic therapy duration for uncolonized patients (days)            | 8      | <sup>36</sup>    |                    |                             |
| $d_{ATB,C}$ | Antibiotic therapy duration                                            | 18     | <sup>36</sup>    |                    |                             |

|            |                                                                                                 |         |               |          |                           |
|------------|-------------------------------------------------------------------------------------------------|---------|---------------|----------|---------------------------|
|            | for colonized patients (days)                                                                   |         |               |          |                           |
| $\theta_s$ | Antibiotic therapy discontinuation rate for uncolonized patients (/day)                         | 0.125   | $1/dATB_s$    |          |                           |
| $\theta_c$ | Antibiotic therapy discontinuation rate for colonized patients (/day)                           | 0.05556 | $1/dATB_c$    |          |                           |
| $p_p$      | Probability of hand hygiene before contact with patient (uncolonized or colonized unidentified) | 0.55    | <sup>37</sup> |          |                           |
| $p_h$      | Probability of hand hygiene after contact with patient(uncolonized or colonized unidentified)   | 0.6     | <sup>37</sup> |          |                           |
| $p_{pls}$  | Probability of hand hygiene before contact with isolated patient                                | 0.8     | assumed       |          |                           |
| $p_{hls}$  | Probability of hand hygiene after contact with isolated patient                                 | 0.8     | assumed       |          |                           |
| $\varphi$  | Prevalence of ESBL-PE carriage among admitted patients                                          | 0.15    | <sup>23</sup> | 0.07-0.3 | triangular (peak at 0.15) |

|       |                                                 |       |               |            |                            |
|-------|-------------------------------------------------|-------|---------------|------------|----------------------------|
| $p_i$ | Probability of infection in colonized patient   | 0.164 | <sup>10</sup> | 0.08- 0.32 | triangular (peak at 0.164) |
| $d_i$ | Mean length of stay of infected patients (days) | 13    | <sup>10</sup> | 6-29 [12]  | triangular (peak at 13)    |
| $s_b$ | Sensitivity of the screening method (%)         | 95    | <sup>11</sup> |            |                            |
| $s_p$ | Specificity of the screening method (%)         | 100   | assumed       |            |                            |

## REFERENCES

- 1 Pelat C, Kardaś-Słoma L, Birgand G, *et al.* Hand Hygiene, Cohorting, or Antibiotic Restriction to Control Outbreaks of Multidrug-Resistant Enterobacteriaceae. *Infect Control Hosp Epidemiol* 2016; **37**: 272–80.
- 2 Nicolas-Chanoine M-H, Jarlier V, Robert J, *et al.* Patient’s origin and lifestyle associated with CTX-M-producing Escherichia coli: a case-control-control study. *PLoS One* 2012; **7**: e30498.
- 3 Colodner R, Rock W, Chazan B, *et al.* Risk factors for the development of extended-spectrum beta-lactamase-producing bacteria in nonhospitalized patients. *Eur J Clin Microbiol Infect Dis Off Publ Eur Soc Clin Microbiol* 2004; **23**: 163–7.
- 4 Ruppé E, Andremont A. Causes, consequences, and perspectives in the variations of intestinal density of colonization of multidrug-resistant enterobacteria. *Front Microbiol* 2013; **4**. DOI:10.3389/fmicb.2013.00129.
- 5 Lerner A, Adler A, Abu-Hanna J, Cohen Percia S, Kazma Matalon M, Carmeli Y. Spread of KPC-producing carbapenem-resistant Enterobacteriaceae: the importance of super-spreaders and rectal KPC concentration. *Clin Microbiol Infect Off Publ Eur Soc Clin Microbiol Infect Dis* 2015; **21**: 470.e1-7.
- 6 Pultz MJ, Donskey CJ. Effects of Imipenem-Cilastatin, Ertapenem, Piperacillin-Tazobactam, and Ceftriaxone Treatments on Persistence of Intestinal Colonization by Extended-Spectrum- $\beta$ -Lactamase-Producing *Klebsiella pneumoniae* Strains in Mice. *Antimicrob Agents Chemother* 2007; **51**: 3044–5.

- 7 Derde LPG, Cooper BS, Goossens H, *et al.* Interventions to reduce colonisation and transmission of antimicrobial-resistant bacteria in intensive care units: an interrupted time series study and cluster randomised trial. *Lancet Infect Dis* 2014; **14**: 31–9.
- 8 French Ministry, of Health website. Décret n°2002-466 du 5 avril 2002 relatif aux conditions techniques de fonctionnement auxquelles doivent satisfaire les établissements de santé pour pratiquer les activités de réanimation, de soins intensifs et de surveillance continue et modifiant le code de la santé publique (troisième partie : Décrets simples). 2002.
- 9 Cooper BS, Medley GF, Scott GM. Preliminary analysis of the transmission dynamics of nosocomial infections: stochastic and management effects. *J Hosp Infect* 1999; **43**: 131–47.
- 10 Barbier F, Pommier C, Essaïed W, *et al.* Colonization and infection with extended-spectrum  $\beta$ -lactamase-producing Enterobacteriaceae in ICU patients: what impact on outcomes and carbapenem exposure? *J Antimicrob Chemother* 2016; **71**: 1088–97.
- 11 Chavada R, Maley M. Evaluation of a Commercial Multiplex PCR for Rapid Detection of Multi Drug Resistant Gram Negative Infections. *Open Microbiol J* 2015; **9**: 125–35.
- 12 Page K, Barnett AG, Campbell M, *et al.* Costing the Australian National Hand Hygiene Initiative. *J Hosp Infect* 2014; **88**: 141–8.
- 13 World Health Organization. WHO Guidelines on Hand Hygiene in Health Care. 2009. [http://apps.who.int/iris/bitstream/10665/44102/1/9789241597906\\_eng.pdf](http://apps.who.int/iris/bitstream/10665/44102/1/9789241597906_eng.pdf) (accessed Sept 6, 2016).
- 14 Ferrer J, Boelle P-Y, Salomon J, *et al.* Management of nurse shortage and its impact on pathogen dissemination in the intensive care unit. *Epidemics* 2014; **9**: 62–9.
- 15 Roger P-M, Farhad R, Pulcini C, *et al.* [Elderly patients presenting with fever and respiratory problems in an intensive care unit. Diagnostic, therapeutic and prognostic impact of a systematic infectious disease consultation]. *Presse Medicale Paris Fr* 1983 2003; **32**: 1699–704.
- 16 Davey P, Brown E, Charani E, *et al.* Interventions to improve antibiotic prescribing practices for hospital inpatients. *Cochrane Database Syst Rev* 2013; : CD003543.
- 17 Rimawi RH, Mazer MA, Siraj DS, Gooch M, Cook PP. Impact of regular collaboration between infectious diseases and critical care practitioners on antimicrobial utilization and patient outcome. *Crit Care Med* 2013; **41**: 2099–107.
- 18 Dik J-WH, Vemer P, Friedrich AW, *et al.* Financial evaluations of antibiotic stewardship programs-a systematic review. *Front Microbiol* 2015; **6**: 317.
- 19 Page K, Graves N, Halton K, Barnett AG. Humans, ‘things’ and space: costing hospital infection control interventions. *J Hosp Infect* 2013; **84**: 200–5.
- 20 Assistance publique – Hôpitaux de Paris (AP-HP). Base de données PMSI. 2015.
- 21 Vasudevan A, Memon BI, Mukhopadhyay A, Li J, Tambyah PA. The costs of nosocomial resistant gram negative intensive care unit infections among patients with the systemic inflammatory response syndrome- a propensity matched case control study. *Antimicrob Resist Infect Control* 2015; **4**: 3.

- 22 MacVane SH, Tuttle LO, Nicolau DP. Impact of extended-spectrum  $\beta$ -lactamase-producing organisms on clinical and economic outcomes in patients with urinary tract infection. *J Hosp Med* 2014; **9**: 232–8.
- 23 Razazi K, Derde LPG, Verachten M, Legrand P, Lesprit P, Brun-Buisson C. Clinical impact and risk factors for colonization with extended-spectrum  $\beta$ -lactamase-producing bacteria in the intensive care unit. *Intensive Care Med* 2012; **38**: 1769–78.
- 24 Viau R, Frank KM, Jacobs MR, *et al.* Intestinal Carriage of Carbapenemase-Producing Organisms: Current Status of Surveillance Methods. *Clin Microbiol Rev* 2016; **29**: 1–27.
- 25 R Core Team. R: The R Project for Statistical Computing. <https://www.r-project.org/> (accessed Sept 15, 2016).
- 26 The French Intensive Care Society. SRLF. <http://www.srlf.org/en/the-french-intensive-care-society/> (accessed Sept 15, 2016).
- 27 French Ministry, of Health website. Décret n° 2002-466 du 5 avril 2002 relatif aux conditions techniques de fonctionnement auxquelles doivent satisfaire les établissements de santé pour pratiquer les activités de réanimation, de soins intensifs et de surveillance continue et modifiant le code de la santé publique (troisième partie : Décrets simples). 2002.
- 28 Steed C, Kelly JW, Blackhurst D, *et al.* Hospital hand hygiene opportunities: where and when (HOW2)? The HOW2 Benchmark Study. *Am J Infect Control* 2011; **39**: 19–26.
- 29 Beggs CB, Noakes CJ, Shepherd SJ, Kerr KG, Sleight PA, Banfield K. The influence of nurse cohorting on hand hygiene effectiveness. *Am J Infect Control* 2006; **34**: 621–6.
- 30 Guyot, J.M. Etude sur l'évaluation des pratiques dans le cadre de la lutte contre les infections nosocomiales sur les « frictions hydro-alcooliques par spécialités médico-chirurgicales ». Lot n°2 : Enquête sur le nombre d'opportunités d'hygiène des mains par spécialité médico-chirurgicale: 2008.
- 31 Austin DJ, Bonten MJ, Weinstein RA, Slaughter S, Anderson RM. Vancomycin-resistant enterococci in intensive-care hospital settings: transmission dynamics, persistence, and the impact of infection control programs. *Proc Natl Acad Sci U S A* 1999; **96**: 6908–13.
- 32 McArdle FI, Lee RJ, Gibb AP, Walsh TS. How much time is needed for hand hygiene in intensive care? A prospective trained observer study of rates of contact between healthcare workers and intensive care patients. *J Hosp Infect* 2006; **62**: 304–10.
- 33 Scheithauer S, Haefner H, Schwanz T, *et al.* Compliance with hand hygiene on surgical, medical, and neurologic intensive care units: direct observation versus calculated disinfectant usage. *Am J Infect Control* 2009; **37**: 835–41.
- 34 Sypsa V, Psychogiou M, Bouzala G-A, Hadjihannas L, Hatzakis A, Daikos GL. Transmission dynamics of carbapenemase-producing *Klebsiella pneumoniae* and anticipated impact of infection control strategies in a surgical unit. *PLoS One* 2012; **7**: e41068.
- 35 REA-Raisin network. Surveillance des infections nosocomiales en réanimation adulte / 2012 / Maladies infectieuses / Rapports et synthèses / Publications et outils / Accueil. <http://invs.santepubliquefrance.fr/Publications-et-outils/Rapports-et-syntheses/Maladies-infectieuses/2012/Surveillance-des-infections-nosocomiales-en-reanimation-adulte> (accessed Sept 15, 2016).

- 36 Robert J, Péan Y, Varon E, *et al.* Point prevalence survey of antibiotic use in French hospitals in 2009. *J Antimicrob Chemother* 2012; **67**: 1020–6.
- 37 Venier AG, Zaro-Goni D, Pefau M, *et al.* Performance of hand hygiene in 214 healthcare facilities in South-Western France. *J Hosp Infect* 2009; **71**: 280–2.
